# Supplementary material for: Antimicrobial resistance among Streptococcus equi subspecies zooepidemicus and Rhodococcus equi isolated from equine specimens submitted to a diagnostic laboratory in Kentucky, USA
Source: PeerJ. 2022 Sep 21;10:e13682. doi: 10.7717/peerj.13682 (PMC9508889; doi:10.7717/peerj.13682)
Supplement: Supplemental Information 1 [file peerj-10-13682-s001.xlsx]

## Sheet: rhodequi_export
SpecSite	intAmikacin	intAmpicill	intAzithrom	intCefazoli	intCeftazid	intCeftiofu	intChloramp	intClarithr	intDoxycycl	intEnroflox	intErythrom	intGentamic	intImipenem	intOxacilli	intPenicill	intRifampin	intTetracyc	intTicarcil	intTicarCla	intTMS	SubmittedDate	Species	Breed	Age	AgeType	Sex	ProcedureName	SpecimenSource	SpecimenType	yr	mt	dy	Amikacin	Ampicillin	Cefazolin	Ceftazidime	Chloramphenicol	Clarithromycin	Doxycycline	Enrofloxacin	Erythromycin	Gentamicin	Imipenem	Oxacillin	Penicillin	Rifampin	Tetracycline	Ticarcillin	TicarClav
Lung	Susceptible	Resistant	No Interpretation	Resistant	Resistant	No Interpretation	Intermediate	Susceptible	Susceptible	Intermediate	Susceptible	Susceptible	Susceptible	Resistant	Resistant	Susceptible	Susceptible	Resistant			2015-08-05 11:04:14	Equine	Thoroughbred	2	Months	Male	Sensitivity	Lung	Bacterium	2015	8	5	0	1	1	1	1	0	0	1	0	0	0	1	1	0	0	1
Lung	Susceptible	Intermediate	No Interpretation	Resistant	Resistant	No Interpretation	Susceptible	Susceptible	Susceptible	Intermediate	Susceptible	Susceptible	Susceptible	Resistant	Resistant	Susceptible	Susceptible	Intermediate	Intermediate	Susceptible	2016-09-13 12:00:59	Equine	Saddlebred, American	3	Months	Male	Sensitivity	Lung	Bacterium	2016	9	13	0	1	1	1	0	0	0	1	0	0	0	1	1	0	0	1	1
Lung	Susceptible	Resistant	No Interpretation	Resistant	Resistant	No Interpretation	Susceptible	Susceptible	Susceptible	Intermediate	Susceptible	Susceptible	Susceptible	Resistant	Resistant	Susceptible	Susceptible	Resistant	Resistant	Resistant	2013-03-16 10:35:00	Equine	Thoroughbred	1.5	Months	Female	Sensitivity	Lung	Bacterium	2013	3	16	0	1	1	1	0	0	0	1	0	0	0	1	1	0	0	1	1
Lung	Susceptible	Resistant	No Interpretation	Resistant	Resistant	No Interpretation	Susceptible	Susceptible	Susceptible	Intermediate	Susceptible	Susceptible	Susceptible	Resistant	Resistant	Susceptible	Susceptible	Resistant	Resistant	Susceptible	2017-04-25 11:02:09	Equine	Thoroughbred	3	Months	NULL	Sensitivity	Lung	Bacterium	2017	4	25	0	1	1	1	0	0	0	1	0	0	0	1	1	0	0	1	1
Abscess	Susceptible	Resistant	No Interpretation	Resistant	Resistant	No Interpretation	Intermediate	Resistant	Susceptible	Susceptible	Resistant	Susceptible	Susceptible	Susceptible	Resistant	Resistant	Susceptible	Resistant	Susceptible	Susceptible	2013-04-18 12:55:01	Equine	Thoroughbred	1.5	Months	Male	Sensitivity	Abscess	Bacterium	2013	4	18	0	1	1	1	1	1	0	0	1	0	0	0	1	1	0	1	0
Lung	Susceptible	Resistant	No Interpretation	Resistant	Resistant	No Interpretation	Intermediate	Susceptible	Susceptible	Intermediate	Susceptible	Susceptible	Susceptible	Resistant	Resistant	Susceptible	Susceptible	Resistant	Resistant	Susceptible	2016-05-11 09:12:33	Equine	Thoroughbred	NULL	NULL	NULL	Sensitivity	Lung	Bacterium	2016	5	11	0	1	1	1	1	0	0	1	0	0	0	1	1	0	0	1	1
Lung	Susceptible	Resistant	No Interpretation	Resistant	Resistant	No Interpretation	Susceptible	Susceptible	Susceptible	Intermediate	Susceptible	Susceptible	Susceptible	Resistant	Resistant	Susceptible	Susceptible	Resistant	Resistant	Resistant	2015-06-13 16:53:50	Equine	Saddlebred, American	2	Months	Male	Sensitivity	Lung	Bacterium	2015	6	13	0	1	1	1	0	0	0	1	0	0	0	1	1	0	0	1	1
Lung	Susceptible	Resistant	No Interpretation	Resistant	Resistant	No Interpretation	Susceptible	Susceptible	Susceptible	Intermediate	Susceptible	Intermediate	Susceptible	Resistant	Resistant	Susceptible	Susceptible	Resistant	Resistant	Resistant	2017-06-02 08:55:13	Equine	Thoroughbred	NULL	NULL	NULL	Sensitivity	Lung	Bacterium	2017	6	2	0	1	1	1	0	0	0	1	0	1	0	1	1	0	0	1	1
Lung	Susceptible	Resistant	No Interpretation	Resistant	Resistant	No Interpretation	Resistant	Resistant	Susceptible	Intermediate	Resistant	Susceptible	Susceptible	Resistant	Resistant	Resistant	Resistant	Resistant	Resistant	Resistant	2014-06-20 14:31:21	Equine	Thoroughbred	3	Months	Male	Sensitivity	Lung	Bacterium	2014	6	20	0	1	1	1	1	1	0	1	1	0	0	1	1	1	1	1	1
Lung	Resistant	Resistant	No Interpretation	Intermediate	Resistant	No Interpretation	Susceptible	Susceptible	Susceptible	Susceptible	Susceptible	Susceptible	Susceptible	Resistant	Resistant	Intermediate	Intermediate	Intermediate	Resistant	Susceptible	2013-05-31 09:02:20	Equine	Thoroughbred	90	Days	Female	Sensitivity	Lung	Bacterium	2013	5	31	1	1	1	1	0	0	0	0	0	0	0	1	1	1	1	1	1
Lung	Susceptible	Resistant	No Interpretation	Resistant	Resistant	No Interpretation	Susceptible	Susceptible	Susceptible	Susceptible	Susceptible	Susceptible	Susceptible	Resistant	Resistant	Susceptible	Intermediate	Resistant	Resistant	Resistant	2012-06-29 08:00:00	Equine	Thoroughbred	1	Months	Female	Sensitivity	Lung	Bacterium	2012	6	29	0	1	1	1	0	0	0	0	0	0	0	1	1	0	1	1	1
	Susceptible	Intermediate	No Interpretation	Intermediate	Resistant	No Interpretation	Susceptible	Susceptible	Susceptible	Susceptible	Susceptible	Susceptible	Susceptible	Resistant	Resistant	Susceptible	Susceptible	Intermediate	Intermediate	Susceptible	2016-07-13 16:12:20	Equine	Thoroughbred	4	Months	Male	Sensitivity	NULL	Bacterium	2016	7	13	0	1	1	1	0	0	0	0	0	0	0	1	1	0	0	1	1
Joint	Susceptible	Intermediate	No Interpretation	Intermediate	Resistant	No Interpretation	Susceptible	Susceptible	Susceptible	Susceptible	Susceptible	Susceptible	Susceptible	Resistant	Resistant	Susceptible	Susceptible	Intermediate	Intermediate	Susceptible	2013-07-17 15:59:55	Equine	Thoroughbred	NULL	NULL	NULL	Sensitivity	Joint	Bacterium	2013	7	17	0	1	1	1	0	0	0	0	0	0	0	1	1	0	0	1	1
Lung	Susceptible	Resistant	No Interpretation	Resistant	Resistant	No Interpretation	Susceptible	Susceptible	Susceptible	Intermediate	Susceptible	Susceptible	Susceptible	Resistant	Resistant	Susceptible	Susceptible	Resistant	Resistant	Susceptible	2017-07-13 10:01:30	Equine	Thoroughbred	2	Months	Male	Sensitivity	Lung	Bacterium	2017	7	13	0	1	1	1	0	0	0	1	0	0	0	1	1	0	0	1	1
Lung	Susceptible	Resistant	No Interpretation	Resistant	Resistant	No Interpretation	Susceptible	Susceptible	Susceptible	Susceptible	Susceptible	Susceptible	Susceptible	Resistant	Resistant	Susceptible	Susceptible	Resistant	Resistant	Resistant	2013-07-19 12:05:48	Equine	Mixed Breed	3	Weeks	Female	Sensitivity	Lung	Bacterium	2013	7	19	0	1	1	1	0	0	0	0	0	0	0	1	1	0	0	1	1
Abscess	Susceptible	Resistant	No Interpretation	Resistant	Resistant	No Interpretation	Resistant	Resistant	Susceptible	Intermediate	Resistant	Susceptible	Susceptible	Resistant	Resistant	Resistant	Susceptible	Resistant	Resistant	Susceptible	2017-07-13 13:36:58	Equine	Thoroughbred	4	Months	Female	Sensitivity	Abscess	Bacterium	2017	7	13	0	1	1	1	1	1	0	1	1	0	0	1	1	1	0	1	1
Abscess	Susceptible	Resistant	No Interpretation	Resistant	Resistant	No Interpretation	Susceptible	Susceptible	Susceptible	Resistant	Susceptible	Susceptible	Susceptible	Susceptible	Resistant	Susceptible	Susceptible	Intermediate	Resistant	Susceptible	2016-07-19 12:32:24	Equine	Thoroughbred	5	Months	Male	Sensitivity	Abscess	Bacterium	2016	7	19	0	1	1	1	0	0	0	1	0	0	0	0	1	0	0	1	1
Mesentery	Susceptible	Intermediate	No Interpretation	Intermediate	Resistant	No Interpretation	Susceptible	Susceptible	Susceptible	Susceptible	Susceptible	Susceptible	Susceptible	Resistant	Resistant	Susceptible	Susceptible	Intermediate	Intermediate	Susceptible	2013-07-25 14:22:13	Equine	Thoroughbred	4	Months	NULL	Sensitivity	Mesentery	Bacterium	2013	7	25	0	1	1	1	0	0	0	0	0	0	0	1	1	0	0	1	1
Lung	Susceptible	Intermediate	No Interpretation	Resistant	Resistant	No Interpretation	Susceptible	Susceptible	Susceptible	Resistant	Susceptible	Susceptible	Susceptible	Resistant	Resistant	Susceptible	Susceptible	Intermediate	Intermediate	Resistant	2017-07-18 13:17:30	Equine	Mixed Breed	NULL	NULL	Male	Sensitivity	Lung	Bacterium	2017	7	18	0	1	1	1	0	0	0	1	0	0	0	1	1	0	0	1	1
Lung	Susceptible	Resistant	No Interpretation	Resistant	Resistant	No Interpretation	Susceptible	Susceptible	Susceptible	Intermediate	Susceptible	Susceptible	Susceptible	Resistant	Resistant	Susceptible	Susceptible	Intermediate	Intermediate	Susceptible	2016-07-21 09:18:20	Equine	Thoroughbred	2	Months	Female	Sensitivity	Lung	Bacterium	2016	7	21	0	1	1	1	0	0	0	1	0	0	0	1	1	0	0	1	1
Vertebral column	Susceptible	Resistant	No Interpretation	Resistant	Resistant	No Interpretation	Resistant	Resistant	Susceptible	Intermediate	Resistant	Susceptible	Susceptible	Resistant	Resistant	Resistant	Susceptible	Resistant	Intermediate	Susceptible	2016-07-23 12:44:18	Equine	Thoroughbred	3	Months	Male	Sensitivity	Vertebral column	Bacterium	2016	7	23	0	1	1	1	1	1	0	1	1	0	0	1	1	1	0	1	1
Abscess	Susceptible	Resistant	No Interpretation	Resistant	Resistant	No Interpretation	Intermediate	Susceptible	Susceptible	Intermediate	Susceptible	Susceptible	Susceptible	Resistant	Resistant	Susceptible	Resistant	Resistant	Resistant	Susceptible	2016-07-25 09:22:26	Equine	Thoroughbred	4	Months	Female	Sensitivity	Abscess	Bacterium	2016	7	25	0	1	1	1	1	0	0	1	0	0	0	1	1	0	1	1	1
Abscess	Susceptible	Resistant	No Interpretation	Resistant	Resistant	No Interpretation	Susceptible	Susceptible	Susceptible	Intermediate	Susceptible	Susceptible	Susceptible	Resistant	Resistant	Susceptible	Susceptible	Resistant	Resistant	Resistant	2016-07-25 12:37:10	Equine	Thoroughbred	8	Months	Male	Sensitivity	Abscess	Bacterium	2016	7	25	0	1	1	1	0	0	0	1	0	0	0	1	1	0	0	1	1
Abscess	Susceptible	Resistant	No Interpretation	Resistant	Resistant	No Interpretation	Susceptible	Susceptible	Susceptible	Intermediate	Susceptible	Susceptible	Susceptible	Resistant	Resistant	Susceptible	Susceptible	Resistant	Resistant	Susceptible	2016-07-25 13:57:18	Equine	Thoroughbred	NULL	NULL	NULL	Sensitivity	Abscess	Bacterium	2016	7	25	0	1	1	1	0	0	0	1	0	0	0	1	1	0	0	1	1
Liver	Susceptible	Resistant	No Interpretation	Resistant	Resistant	No Interpretation	Susceptible	Susceptible	Susceptible	Intermediate	Susceptible	Susceptible	Susceptible	Resistant	Resistant	Susceptible	Susceptible	Intermediate	Intermediate	Susceptible	2016-07-27 12:48:54	Equine	Thoroughbred	2	Months	Female	Sensitivity	Liver	Bacterium	2016	7	27	0	1	1	1	0	0	0	1	0	0	0	1	1	0	0	1	1
Abscess	Susceptible	Resistant	No Interpretation	Resistant	Resistant	No Interpretation	Intermediate	Resistant	Susceptible	Intermediate	Resistant	Susceptible	Susceptible	Resistant	Resistant	Resistant	Susceptible	Intermediate	Intermediate	Susceptible	2016-07-28 12:06:00	Equine	Thoroughbred	6	Months	Male	Sensitivity	Abscess	Bacterium	2016	7	28	0	1	1	1	1	1	0	1	1	0	0	1	1	1	0	1	1
Joint	Susceptible	Resistant	No Interpretation	Resistant	Resistant	No Interpretation	Susceptible	Susceptible	Susceptible	Susceptible	Susceptible	Susceptible	Susceptible	Resistant	Resistant	Susceptible	Susceptible	Resistant	Resistant	Susceptible	2016-07-29 15:45:01	Equine	Thoroughbred	4	Months	Female	Sensitivity	Joint	Bacterium	2016	7	29	0	1	1	1	0	0	0	0	0	0	0	1	1	0	0	1	1
Lung	Susceptible	Intermediate	No Interpretation	Intermediate	Resistant	No Interpretation	Susceptible	Susceptible	Susceptible	Resistant	Susceptible	Susceptible	Susceptible	Resistant	Resistant	Susceptible	Susceptible	Intermediate	Intermediate	Susceptible	2015-08-24 09:00:37	Equine	Thoroughbred	6	Months	Male	Sensitivity	Lung	Bacterium	2015	8	24	0	1	1	1	0	0	0	1	0	0	0	1	1	0	0	1	1
Abscess	Susceptible	Resistant	No Interpretation	Resistant	Resistant	No Interpretation	Susceptible	Susceptible	Susceptible	Intermediate	Susceptible	Susceptible	Susceptible	Resistant	Resistant	Susceptible	Susceptible	Resistant	Resistant	Resistant	2012-07-27 09:22:00	Equine	Thoroughbred	5	Months	Male	Sensitivity	Abscess	Bacterium	2012	7	27	0	1	1	1	0	0	0	1	0	0	0	1	1	0	0	1	1
Lung	Susceptible	Resistant	No Interpretation	Resistant	Resistant	No Interpretation	Intermediate	Susceptible	Susceptible	Intermediate	Susceptible	Susceptible	Susceptible	Resistant	Resistant	Susceptible	Susceptible	Intermediate	Intermediate	Susceptible	2016-01-21 12:31:13	Equine	Tennessee Walking Horse	1.5	Years	Male	Sensitivity	Lung	Bacterium	2016	1	21	0	1	1	1	1	0	0	1	0	0	0	1	1	0	0	1	1
Abscess	Susceptible	Intermediate	No Interpretation	Resistant	Resistant	No Interpretation	Intermediate	Susceptible	Susceptible	Resistant	Susceptible	Susceptible	Susceptible	Resistant	Resistant	Resistant	Susceptible	Resistant	Resistant	Susceptible	2014-09-19 08:54:08	Equine	Thoroughbred	6	Months	Female	Sensitivity	Abscess	Bacterium	2014	9	19	0	1	1	1	1	0	0	1	0	0	0	1	1	1	0	1	1
	Susceptible	Resistant	No Interpretation	Resistant	Resistant	No Interpretation	Susceptible	Resistant	Susceptible	Intermediate	Resistant	Susceptible	Susceptible	Resistant	Resistant	Resistant	Resistant	Resistant	Resistant	Resistant	2016-08-20 16:31:39	Equine	Thoroughbred	NULL	NULL	NULL	Sensitivity	NULL	Bacterium	2016	8	20	0	1	1	1	0	1	0	1	1	0	0	1	1	1	1	1	1
Abdomen	Susceptible	Resistant	No Interpretation	Resistant	Resistant	No Interpretation	Resistant	Resistant	Susceptible	Intermediate	Resistant	Susceptible	Susceptible	Resistant	Resistant	Resistant	Susceptible	Resistant	Resistant	Susceptible	2017-08-17 09:50:48	Equine	Thoroughbred	6	Months	Male	Sensitivity	Abdomen	Bacterium	2017	8	17	0	1	1	1	1	1	0	1	1	0	0	1	1	1	0	1	1
Abscess	Susceptible	Resistant	No Interpretation	Intermediate	Resistant	No Interpretation	Susceptible	Susceptible	Susceptible	Intermediate	Susceptible	Susceptible	Susceptible	Resistant	Resistant	Intermediate	Susceptible	Intermediate	Intermediate	Susceptible	2017-08-21 11:27:57	Equine	Thoroughbred	14	Weeks	Female	Sensitivity	Abscess	Bacterium	2017	8	21	0	1	1	1	0	0	0	1	0	0	0	1	1	1	0	1	1
Lung	Susceptible	Resistant	No Interpretation	Resistant	Resistant	No Interpretation	Intermediate	Resistant	Susceptible	Intermediate	Resistant	Susceptible	Susceptible	Resistant	Resistant	Resistant	Resistant	Resistant	Resistant	Resistant	2012-08-23 09:38:24	Equine	Thoroughbred	NULL	NULL	Male	Sensitivity	Lung	Bacterium	2012	8	23	0	1	1	1	1	1	0	1	1	0	0	1	1	1	1	1	1
Abscess	Susceptible	Intermediate	No Interpretation	Intermediate	Resistant	No Interpretation	Susceptible	Susceptible	Susceptible	Susceptible	Susceptible	Susceptible	Susceptible	Resistant	Resistant	Susceptible	Susceptible	Intermediate	Intermediate	Susceptible	2016-09-02 11:09:34	Equine	Thoroughbred	NULL	NULL	Male	Sensitivity	Abscess	Bacterium	2016	9	2	0	1	1	1	0	0	0	0	0	0	0	1	1	0	0	1	1
Liver	Resistant	Resistant	No Interpretation	Resistant	Resistant	No Interpretation	Resistant	Resistant	Resistant	Resistant	Resistant	Resistant	Resistant	Resistant	Resistant	Resistant	Resistant	Resistant	Resistant	Resistant	2015-09-24 13:11:04	Equine	Thoroughbred	4	Months	Male	Sensitivity	Liver	Bacterium	2015	9	24	1	1	1	1	1	1	1	1	1	1	1	1	1	1	1	1	1
Lung	Susceptible	Resistant	No Interpretation	Resistant	Resistant	No Interpretation	Intermediate	Resistant	Susceptible	Intermediate	Resistant	Susceptible	Susceptible	Resistant	Resistant	Resistant	Susceptible	Resistant	Resistant	Susceptible	2016-09-15 13:50:05	Equine	Thoroughbred	NULL	NULL	Female	Sensitivity	Lung	Bacterium	2016	9	15	0	1	1	1	1	1	0	1	1	0	0	1	1	1	0	1	1
Abscess	Susceptible	Resistant	No Interpretation	Resistant	Resistant	No Interpretation	Intermediate	Resistant	Susceptible	Intermediate	Resistant	Susceptible	Susceptible	Resistant	Resistant	Resistant	Resistant	Resistant	Resistant	Resistant	2016-09-15 13:50:05	Equine	Thoroughbred	NULL	NULL	Female	Sensitivity	Abscess	Bacterium	2016	9	15	0	1	1	1	1	1	0	1	1	0	0	1	1	1	1	1	1
Lymph node	Susceptible	Resistant	No Interpretation	Resistant	Resistant	No Interpretation	Intermediate	Susceptible	Susceptible	Intermediate	Susceptible	Susceptible	Susceptible	Resistant	Resistant	Susceptible	Susceptible	Resistant	Resistant	Resistant	2017-09-25 16:04:04	Equine	Thoroughbred	6	Months	Female	Sensitivity	Lymph node	Bacterium	2017	9	25	0	1	1	1	1	0	0	1	0	0	0	1	1	0	0	1	1
Lung	Susceptible	Intermediate	No Interpretation	Intermediate	Resistant	No Interpretation	Susceptible	Susceptible	Susceptible	Intermediate	Susceptible	Susceptible	Susceptible	Resistant	Resistant	Susceptible	Susceptible	Intermediate	Intermediate	Susceptible	2015-10-26 12:46:01	Equine	Thoroughbred	7	Months	Male	Sensitivity	Lung	Bacterium	2015	10	26	0	1	1	1	0	0	0	1	0	0	0	1	1	0	0	1	1
Lung	Susceptible	Resistant	No Interpretation	Resistant	Resistant	No Interpretation	Susceptible	Susceptible	Susceptible	Intermediate	Intermediate	Susceptible	Susceptible	Susceptible	Resistant	Susceptible	Susceptible	Resistant	Intermediate	Susceptible	2013-11-13 11:01:55	Equine	Thoroughbred	7	Months	Female	Sensitivity	Lung	Bacterium	2013	11	13	0	1	1	1	0	0	0	1	1	0	0	0	1	0	0	1	1
Lung	Susceptible	Resistant	No Interpretation	Resistant	Resistant	No Interpretation	Susceptible	Susceptible	Susceptible	Intermediate	Susceptible	Susceptible	Susceptible	Resistant	Resistant	Susceptible	Susceptible	Resistant	Resistant	Resistant	2013-01-03 16:23:19	Equine	Thoroughbred	NULL	NULL	NULL	Sensitivity	Lung	Bacterium	2013	1	3	0	1	1	1	0	0	0	1	0	0	0	1	1	0	0	1	1
Abscess	Susceptible	Resistant	No Interpretation	Resistant	Resistant	No Interpretation	Intermediate	Susceptible	Susceptible	Resistant	Susceptible	Susceptible	Susceptible	Resistant	Resistant	Resistant	Resistant	Resistant	Resistant	Resistant	2014-12-16 13:53:59	Equine	Thoroughbred	NULL	NULL	Female	Sensitivity	Abscess	Bacterium	2014	12	16	0	1	1	1	1	0	0	1	0	0	0	1	1	1	1	1	1
Lung	Susceptible	Resistant	No Interpretation	Resistant	Resistant	No Interpretation	Resistant	Susceptible	Susceptible	Resistant	Susceptible	Susceptible	Susceptible	Resistant	Resistant	Resistant	Intermediate	Resistant	Resistant	Resistant	2014-12-16 10:40:07	Equine	Thoroughbred	NULL	NULL	Male	Sensitivity	Lung	Bacterium	2014	12	16	0	1	1	1	1	0	0	1	0	0	0	1	1	1	1	1	1
Joint	Susceptible	Resistant	No Interpretation	Resistant	Resistant	No Interpretation	Susceptible	Susceptible	Susceptible	Resistant	Susceptible	Susceptible	Susceptible	Resistant	Resistant	Resistant	Susceptible	Resistant	Resistant	Susceptible	2017-10-17 10:48:17	Equine	Thoroughbred	NULL	NULL	Male	Sensitivity	Joint	Bacterium	2017	10	17	0	1	1	1	0	0	0	1	0	0	0	1	1	1	0	1	1
Abscess	Susceptible	No Interpretation	No Interpretation	Resistant	No Interpretation	No Interpretation	Susceptible	Susceptible	Intermediate	No Interpretation	No Interpretation	Susceptible	Susceptible	No Interpretation	No Interpretation	No Interpretation	No Interpretation	No Interpretation	No Interpretation	Susceptible	2017-11-14 10:08:04	Equine	Thoroughbred	NULL	NULL	NULL	Sensitivity	Abscess	Bacterium	2017	11	14	0		1		0	0	1			0	0
Abscess	Susceptible	Resistant	No Interpretation	Resistant	Resistant	No Interpretation	Susceptible	Susceptible	Susceptible	Intermediate	Susceptible	Susceptible	Susceptible	Resistant	Resistant	Susceptible	Susceptible	Resistant	Resistant	Susceptible	2016-12-29 10:49:04	Equine	Thoroughbred	NULL	NULL	NULL	Sensitivity	Abscess	Bacterium	2016	12	29	0	1	1	1	0	0	0	1	0	0	0	1	1	0	0	1	1
Lung	Susceptible	Resistant	No Interpretation	Resistant	Resistant	No Interpretation	Susceptible	Susceptible	Susceptible	Intermediate	Susceptible	Susceptible	Susceptible	Resistant	Resistant	Susceptible	Susceptible	Resistant	Resistant	Resistant	2015-03-03 13:28:36	Equine	Thoroughbred	1.5	Months	Male	Sensitivity	Lung	Bacterium	2015	3	3	0	1	1	1	0	0	0	1	0	0	0	1	1	0	0	1	1
Abscess	Susceptible	Resistant	No Interpretation	Resistant	Resistant	No Interpretation	Susceptible	Susceptible	Susceptible	Susceptible	Susceptible	Susceptible	Susceptible	Resistant	Resistant	Susceptible	Susceptible	Resistant	Intermediate	Resistant	2012-01-07 12:00:00	Equine	Thoroughbred	10	Months	Female	Sensitivity	Abscess	Bacterium	2012	1	7	0	1	1	1	0	0	0	0	0	0	0	1	1	0	0	1	1
Lung	Susceptible	Intermediate	No Interpretation	Resistant	Resistant	No Interpretation	Susceptible	Susceptible	Susceptible	Intermediate	Susceptible	Susceptible	Susceptible	Resistant	Resistant	Susceptible	Susceptible	Intermediate	Intermediate	Susceptible	2017-03-15 12:52:28	Equine	Thoroughbred	NULL	NULL	Female	Sensitivity	Lung	Bacterium	2017	3	15	0	1	1	1	0	0	0	1	0	0	0	1	1	0	0	1	1
Abdomen	Susceptible	Resistant	No Interpretation	Resistant	Resistant	No Interpretation	Intermediate	Intermediate	Susceptible	Intermediate	Intermediate	Susceptible	Susceptible	Resistant	Resistant	Resistant	Susceptible	Intermediate	Intermediate	Susceptible	2016-09-15 13:50:05	Equine	Thoroughbred	NULL	NULL	Female	Sensitivity	Abdomen	Swab	2016	9	15	0	1	1	1	1	1	0	1	1	0	0	1	1	1	0	1	1
Placenta	Susceptible	Resistant	No Interpretation	Resistant	Resistant	No Interpretation	Susceptible	Susceptible	Susceptible	Intermediate	Susceptible	Susceptible	Susceptible	Resistant	Resistant	Susceptible	Susceptible	Intermediate	Intermediate	Resistant	2012-03-21 09:30:40	Equine	Thoroughbred	8	Years	Female	Sensitivity	Placenta	Bacterium	2012	3	21	0	1	1	1	0	0	0	1	0	0	0	1	1	0	0	1	1
Lung	Susceptible	Resistant	No Interpretation	Resistant	Resistant	No Interpretation	Intermediate	Resistant	Susceptible	Intermediate	Resistant	Susceptible	Susceptible	Resistant	Resistant	Resistant	Susceptible	Intermediate	Intermediate	Susceptible	2016-03-22 09:47:12	Equine	Thoroughbred	6	Weeks	Male	Sensitivity	Lung	Bacterium	2016	3	22	0	1	1	1	1	1	0	1	1	0	0	1	1	1	0	1	1
Lung	Susceptible	Resistant	No Interpretation	Resistant	Resistant	No Interpretation	Susceptible	Susceptible	Susceptible	Resistant	Susceptible	Susceptible	Susceptible	Resistant	Resistant	Susceptible	Susceptible	Resistant	Resistant	Susceptible	2014-04-04 10:20:12	Equine	Thoroughbred	30	Days	NULL	Sensitivity	Lung	Bacterium	2014	4	4	0	1	1	1	0	0	0	1	0	0	0	1	1	0	0	1	1
Lung	Susceptible	Resistant	No Interpretation	Resistant	Resistant	No Interpretation	Intermediate	Susceptible	Susceptible	Intermediate	Susceptible	Susceptible	Susceptible	Resistant	Resistant	Resistant	Resistant	Resistant	Resistant	Resistant	2015-04-15 10:05:11	Equine	Thoroughbred	NULL	NULL	NULL	Sensitivity	Lung	Bacterium	2015	4	15	0	1	1	1	1	0	0	1	0	0	0	1	1	1	1	1	1
Lung	Susceptible	Resistant	No Interpretation	Resistant	Resistant	No Interpretation	Susceptible	Susceptible	Susceptible	Susceptible	Susceptible	Susceptible	Susceptible	Resistant	Resistant	Susceptible	Susceptible	Resistant	Intermediate	Susceptible	2014-04-08 17:00:11	Equine	Standardbred	5	Weeks	NULL	Sensitivity	Lung	Bacterium	2014	4	8	0	1	1	1	0	0	0	0	0	0	0	1	1	0	0	1	1
Liver	Susceptible	Resistant	No Interpretation	Resistant	Resistant	No Interpretation	Susceptible	Susceptible	Susceptible	Susceptible	Susceptible	Susceptible	Susceptible	Resistant	Resistant	Susceptible	Intermediate	Intermediate	Resistant	Resistant	2015-04-16 14:15:14	Equine	NULL	4	Years	Neutered	Sensitivity	Liver	Bacterium	2015	4	16	0	1	1	1	0	0	0	0	0	0	0	1	1	0	1	1	1
Lung	Susceptible	Intermediate	No Interpretation	Resistant	Resistant	No Interpretation	Susceptible	Susceptible	Susceptible	Intermediate	Susceptible	Susceptible	Susceptible	Resistant	Resistant	Susceptible	Susceptible	Intermediate	Intermediate	Susceptible	2016-04-02 12:49:10	Equine	Thoroughbred	8	Weeks	Female	Sensitivity	Lung	Bacterium	2016	4	2	0	1	1	1	0	0	0	1	0	0	0	1	1	0	0	1	1
Lung	Susceptible	Resistant	No Interpretation	Resistant	Resistant	No Interpretation	Intermediate	Susceptible	Susceptible	Intermediate	Susceptible	Susceptible	Susceptible	Resistant	Resistant	Susceptible	Susceptible	Resistant	Resistant	Resistant	2017-04-06 13:45:41	Equine	Thoroughbred	6	Weeks	Female	Sensitivity	Lung	Bacterium	2017	4	6	0	1	1	1	1	0	0	1	0	0	0	1	1	0	0	1	1
Joint	Susceptible	Resistant	No Interpretation	Resistant	Resistant	No Interpretation	Resistant	Susceptible	Susceptible	Intermediate	Susceptible	Susceptible	Susceptible	Resistant	Resistant	Resistant	Susceptible	Resistant	Resistant	Resistant	2015-04-18 12:40:40	Equine	Thoroughbred	12	Weeks	Male	Sensitivity	Joint	Bacterium	2015	4	18	0	1	1	1	1	0	0	1	0	0	0	1	1	1	0	1	1
Lung	Susceptible	Resistant	No Interpretation	Resistant	Resistant	No Interpretation	Susceptible	Intermediate	Susceptible	Intermediate	Resistant	Susceptible	Susceptible	Resistant	Resistant	Resistant	Resistant	Resistant	Resistant	Resistant	2014-04-12 16:37:01	Equine	Thoroughbred	NULL	NULL	Female	Sensitivity	Lung	Bacterium	2014	4	12	0	1	1	1	0	1	0	1	1	0	0	1	1	1	1	1	1
Lung	Susceptible	Intermediate	No Interpretation	Resistant	Resistant	No Interpretation	Susceptible	Susceptible	Susceptible	Susceptible	Susceptible	Susceptible	Susceptible	Resistant	Resistant	Susceptible	Susceptible	Intermediate	Intermediate	Susceptible	2016-04-09 16:34:23	Equine	Thoroughbred	2	Months	NULL	Sensitivity	Lung	Bacterium	2016	4	9	0	1	1	1	0	0	0	0	0	0	0	1	1	0	0	1	1
Lung	Susceptible	Resistant	No Interpretation	Resistant	Resistant	No Interpretation	Susceptible	Susceptible	Susceptible	Susceptible	Susceptible	Susceptible	Susceptible	Resistant	Resistant	Susceptible	Susceptible	Resistant	Resistant	Susceptible	2014-04-18 11:10:31	Equine	Thoroughbred	2	Months	Female	Sensitivity	Lung	Bacterium	2014	4	18	0	1	1	1	0	0	0	0	0	0	0	1	1	0	0	1	1
Lung	Susceptible	Intermediate	No Interpretation	Resistant	Resistant	No Interpretation	Susceptible	Susceptible	Susceptible	Susceptible	Susceptible	Susceptible	Susceptible	Resistant	Resistant	Susceptible	Susceptible	Intermediate	Intermediate	Susceptible	2016-04-11 09:22:04	Equine	Thoroughbred	5	Weeks	Female	Sensitivity	Lung	Bacterium	2016	4	11	0	1	1	1	0	0	0	0	0	0	0	1	1	0	0	1	1
Lung	Susceptible	Resistant	No Interpretation	Resistant	Resistant	No Interpretation	Susceptible	Susceptible	Susceptible	Susceptible	Susceptible	Susceptible	Susceptible	Resistant	Resistant						2014-04-21 08:36:05	Equine	Thoroughbred	NULL	NULL	Female	Sensitivity	Lung	Bacterium	2014	4	21	0	1	1	1	0	0	0	0	0	0	0	1	1
Lung	Susceptible	Resistant	No Interpretation	Resistant	Resistant	No Interpretation	Susceptible	Susceptible	Susceptible	Resistant	Susceptible	Susceptible	Susceptible	Resistant	Resistant	Susceptible	Susceptible	Resistant	Resistant	Susceptible	2014-04-23 09:31:58	Equine	Thoroughbred	2	Months	NULL	Sensitivity	Lung	Bacterium	2014	4	23	0	1	1	1	0	0	0	1	0	0	0	1	1	0	0	1	1
Lung	Intermediate	Resistant	No Interpretation	Resistant	Resistant	No Interpretation	Susceptible	Susceptible	Intermediate	Intermediate	Susceptible	Intermediate	Susceptible	Resistant	Resistant	Susceptible	Resistant	Resistant	Resistant	Susceptible	2017-04-19 10:49:41	Equine	Thoroughbred	2	Months	Male	Sensitivity	Lung	Bacterium	2017	4	19	1	1	1	1	0	0	1	1	0	1	0	1	1	0	1	1	1
Abscess	Susceptible	Resistant	No Interpretation	Resistant	Resistant	No Interpretation	Susceptible	Susceptible	Susceptible	Susceptible	Susceptible	Susceptible	Susceptible	Resistant	Resistant	Susceptible	Susceptible	Resistant	Resistant	Susceptible	2016-04-15 15:18:20	Equine	Thoroughbred	2	Months	NULL	Sensitivity	Abscess	Bacterium	2016	4	15	0	1	1	1	0	0	0	0	0	0	0	1	1	0	0	1	1
Abscess	Susceptible	Resistant	No Interpretation	Resistant	Resistant	No Interpretation	Susceptible	Susceptible	Susceptible	Intermediate	Susceptible	Susceptible	Susceptible	Resistant	Resistant	Susceptible	Susceptible	Intermediate	Intermediate	Susceptible	2014-04-26 14:43:03	Equine	Mixed Breed	4	Months	Male	Sensitivity	Abscess	Bacterium	2014	4	26	0	1	1	1	0	0	0	1	0	0	0	1	1	0	0	1	1
Lung	Susceptible	Resistant	No Interpretation	Resistant	Resistant	No Interpretation	Resistant	Susceptible	Susceptible	Resistant	Susceptible	Susceptible	Susceptible	Resistant	Resistant	Susceptible	Susceptible	Resistant	Resistant	Susceptible	2017-04-20 09:26:48	Equine	Thoroughbred	6	Weeks	Female	Sensitivity	Lung	Bacterium	2017	4	20	0	1	1	1	1	0	0	1	0	0	0	1	1	0	0	1	1
Abscess	Susceptible	Resistant	No Interpretation	Resistant	Resistant	No Interpretation	Susceptible	Susceptible	Susceptible	Intermediate	Susceptible	Susceptible	Susceptible	Resistant	Resistant	Susceptible	Susceptible	Intermediate	Intermediate	Susceptible	2014-04-29 09:10:44	Equine	Thoroughbred	2	Months	Female	Sensitivity	Abscess	Bacterium	2014	4	29	0	1	1	1	0	0	0	1	0	0	0	1	1	0	0	1	1
Lymph node	Susceptible	Resistant	No Interpretation	Resistant	Resistant	No Interpretation	Susceptible	Susceptible	Susceptible	Intermediate	Susceptible	Susceptible	Susceptible	Resistant	Resistant	Susceptible	Susceptible	Resistant	Resistant	Susceptible	2014-04-30 12:05:01	Equine	Thoroughbred	NULL	NULL	Male	Sensitivity	Lymph node	Bacterium	2014	4	30	0	1	1	1	0	0	0	1	0	0	0	1	1	0	0	1	1
Lung	Susceptible	Intermediate	No Interpretation	Resistant	Resistant	No Interpretation	Susceptible	Susceptible	Susceptible	Intermediate	Susceptible	Susceptible	Susceptible	Susceptible	Resistant	Susceptible	Susceptible	Intermediate	Intermediate	Susceptible	2013-04-17 10:35:20	Equine	Thoroughbred	3	Months	Male	Sensitivity	Lung	Bacterium	2013	4	17	0	1	1	1	0	0	0	1	0	0	0	0	1	0	0	1	1
Lung	Susceptible	Resistant	No Interpretation	Resistant	Resistant	No Interpretation	Susceptible	Susceptible	Susceptible	Intermediate	Susceptible	Susceptible	Susceptible	Resistant	Resistant	Susceptible	Susceptible	Intermediate	Intermediate	Susceptible	2016-04-25 09:07:37	Equine	Thoroughbred	3	Weeks	Male	Sensitivity	Lung	Bacterium	2016	4	25	0	1	1	1	0	0	0	1	0	0	0	1	1	0	0	1	1
Lung	Susceptible	Resistant	No Interpretation	Resistant	Resistant	No Interpretation	Susceptible	Susceptible	Susceptible	Intermediate	Susceptible	Susceptible	Susceptible	Resistant	Resistant	Susceptible	Susceptible	Resistant	Resistant	Susceptible	2014-05-04 14:16:20	Equine	Thoroughbred	NULL	NULL	NULL	Sensitivity	Lung	Bacterium	2014	5	4	0	1	1	1	0	0	0	1	0	0	0	1	1	0	0	1	1
Lung	Susceptible	Intermediate	No Interpretation	Resistant	Resistant	No Interpretation	Susceptible	Susceptible	Susceptible	Resistant	Susceptible	Susceptible	Susceptible	Resistant	Resistant	Susceptible	Susceptible	Intermediate	Intermediate	Susceptible	2012-04-17 15:24:21	Equine	NULL	2	Months	NULL	Sensitivity	Lung	Bacterium	2012	4	17	0	1	1	1	0	0	0	1	0	0	0	1	1	0	0	1	1
Lung	Susceptible	Intermediate	No Interpretation	Resistant	Resistant	No Interpretation	Susceptible	Susceptible	Susceptible	Intermediate	Susceptible	Susceptible	Susceptible	Resistant	Resistant	Susceptible	Susceptible	Intermediate	Intermediate	Susceptible	2014-05-06 08:35:55	Equine	Thoroughbred	6	Weeks	Male	Sensitivity	Lung	Bacterium	2014	5	6	0	1	1	1	0	0	0	1	0	0	0	1	1	0	0	1	1
Lung	Susceptible	Resistant	No Interpretation	Resistant	Resistant	No Interpretation	Resistant	Susceptible	Susceptible	Intermediate	Susceptible	Susceptible	Susceptible	Resistant	Resistant	Susceptible	Susceptible	Resistant	Resistant	Susceptible	2013-04-23 08:50:00	Equine	Thoroughbred	NULL	NULL	Female	Sensitivity	Lung	Bacterium	2013	4	23	0	1	1	1	1	0	0	1	0	0	0	1	1	0	0	1	1
Lung	Susceptible	Intermediate	No Interpretation	Resistant	Resistant	No Interpretation	Susceptible	Susceptible	Susceptible	Susceptible	Susceptible	Susceptible	Susceptible	Resistant	Resistant	Susceptible	Susceptible	Intermediate	Intermediate	Susceptible	2017-04-30 16:37:17	Equine	NULL	60	Days	Female	Sensitivity	Lung	Bacterium	2017	4	30	0	1	1	1	0	0	0	0	0	0	0	1	1	0	0	1	1
Lung	Susceptible	Resistant	No Interpretation	Resistant	Resistant	No Interpretation	Intermediate	Susceptible	Susceptible	Susceptible	Susceptible	Susceptible	Susceptible	Resistant	Resistant	Susceptible	Susceptible	Intermediate	Intermediate	Resistant	2015-05-18 09:30:03	Equine	Thoroughbred	1	Months	Female	Sensitivity	Lung	Bacterium	2015	5	18	0	1	1	1	1	0	0	0	0	0	0	1	1	0	0	1	1
Lung	Susceptible	Resistant	No Interpretation	Resistant	Resistant	No Interpretation	Susceptible	Susceptible	Susceptible	Resistant	Susceptible	Susceptible	Susceptible	Resistant	Resistant	Susceptible	Intermediate	Resistant	Resistant	Resistant	2015-05-18 12:12:43	Equine	Thoroughbred	45	Days	NULL	Sensitivity	Lung	Bacterium	2015	5	18	0	1	1	1	0	0	0	1	0	0	0	1	1	0	1	1	1
Lung	Susceptible	Intermediate	No Interpretation	Resistant	Resistant	No Interpretation	Susceptible	Susceptible	Susceptible	Susceptible	Susceptible	Susceptible	Susceptible	Susceptible	Resistant	Susceptible	Susceptible	Intermediate	Intermediate	Susceptible	2013-04-29 10:47:28	Equine	Thoroughbred	NULL	NULL	NULL	Sensitivity	Lung	Bacterium	2013	4	29	0	1	1	1	0	0	0	0	0	0	0	0	1	0	0	1	1
Spinal cord	Susceptible	Resistant	No Interpretation	Resistant	Resistant	No Interpretation	Susceptible	Susceptible	Susceptible	Intermediate	Susceptible	Susceptible	Susceptible	Resistant	Resistant	Susceptible	Susceptible	Resistant	Resistant	Resistant	2013-04-29 14:07:00	Equine	Thoroughbred	2	Months	Female	Sensitivity	Spinal cord	Bacterium	2013	4	29	0	1	1	1	0	0	0	1	0	0	0	1	1	0	0	1	1
Trachea	Susceptible	Resistant	No Interpretation	Resistant	Resistant	No Interpretation	Intermediate	Resistant	Susceptible	Intermediate	Resistant	Susceptible	Susceptible	Resistant	Resistant	Resistant	Resistant	Resistant	Resistant	Resistant	2015-05-19 13:43:58	Equine	Thoroughbred	2.5	Months	NULL	Sensitivity	Trachea	Bacterium	2015	5	19	0	1	1	1	1	1	0	1	1	0	0	1	1	1	1	1	1
Lymph node	Susceptible	Resistant	No Interpretation	Resistant	Resistant	No Interpretation	Intermediate	Susceptible	Susceptible	Intermediate	Susceptible	Susceptible	Susceptible	Resistant	Resistant	Susceptible	Susceptible	Resistant	Intermediate	Susceptible	2017-05-08 16:28:30	Equine	Thoroughbred	2	Months	Female	Sensitivity	Lymph node	Bacterium	2017	5	8	0	1	1	1	1	0	0	1	0	0	0	1	1	0	0	1	1
Lung	Susceptible	Resistant	No Interpretation	Resistant	Resistant	No Interpretation	Susceptible	Susceptible	Susceptible	Susceptible	Susceptible	Susceptible	Susceptible	Resistant	Resistant	Susceptible	Susceptible	Resistant	Resistant	Resistant	2015-05-21 16:10:52	Equine	Thoroughbred	50	Days	Male	Sensitivity	Lung	Bacterium	2015	5	21	0	1	1	1	0	0	0	0	0	0	0	1	1	0	0	1	1
Placenta	Susceptible	Resistant	No Interpretation	Resistant	Resistant	No Interpretation	Susceptible	Susceptible	Susceptible	Intermediate	Susceptible	Susceptible	Susceptible	Resistant	Resistant	Susceptible	Susceptible	Intermediate	Intermediate	Susceptible	2012-04-27 16:37:39	Equine	Thoroughbred	12	Hours	NULL	Sensitivity	Placenta	Bacterium	2012	4	27	0	1	1	1	0	0	0	1	0	0	0	1	1	0	0	1	1
Trachea	Susceptible	Resistant	No Interpretation	Resistant	Resistant	No Interpretation	Intermediate	Susceptible	Susceptible	Resistant	Susceptible	Susceptible	Susceptible	Resistant	Resistant	Susceptible	Susceptible	Intermediate	Resistant	Resistant	2015-05-26 14:34:36	Equine	Thoroughbred	2	Months	NULL	Sensitivity	Trachea	Bacterium	2015	5	26	0	1	1	1	1	0	0	1	0	0	0	1	1	0	0	1	1
Lung	Susceptible	Intermediate	No Interpretation	Resistant	Resistant	No Interpretation	Susceptible	Susceptible	Intermediate	Resistant	Susceptible	Susceptible	Susceptible	Resistant	Resistant	Susceptible	Susceptible	Resistant	Intermediate	Susceptible	2013-05-07 10:00:10	Equine	Thoroughbred	6	Weeks	Female	Sensitivity	Lung	Bacterium	2013	5	7	0	1	1	1	0	0	1	1	0	0	0	1	1	0	0	1	1
Lung	Susceptible	Intermediate	No Interpretation	Intermediate	Resistant	No Interpretation	Susceptible	Susceptible	Susceptible	Susceptible	Susceptible	Susceptible	Susceptible	Resistant	Resistant	Susceptible	Susceptible	Intermediate	Intermediate	Susceptible	2015-05-30 15:05:34	Equine	Thoroughbred	NULL	NULL	Female	Sensitivity	Lung	Bacterium	2015	5	30	0	1	1	1	0	0	0	0	0	0	0	1	1	0	0	1	1
Lung	Susceptible	Resistant	No Interpretation	Resistant	Resistant	No Interpretation	Susceptible	Susceptible	Susceptible	Susceptible	Susceptible	Susceptible	Susceptible	Resistant	Resistant	Susceptible	Susceptible	Resistant	Resistant	Susceptible	2016-05-14 10:14:49	Equine	Thoroughbred	2	Months	Male	Sensitivity	Lung	Bacterium	2016	5	14	0	1	1	1	0	0	0	0	0	0	0	1	1	0	0	1	1
Lung	Susceptible	Resistant	No Interpretation	Resistant	Resistant	No Interpretation	Resistant	Resistant	Susceptible	Resistant	Resistant	Susceptible	Susceptible	Resistant	Resistant	Resistant	Resistant	Resistant	Resistant	Resistant	2015-06-01 12:57:02	Equine	Thoroughbred	2	Months	Male	Sensitivity	Lung	Bacterium	2015	6	1	0	1	1	1	1	1	0	1	1	0	0	1	1	1	1	1	1
Lung	Susceptible	Resistant	No Interpretation	Resistant	Resistant	No Interpretation	Susceptible	Susceptible	Susceptible	Intermediate	Susceptible	Susceptible	Susceptible	Resistant	Resistant	Susceptible	Susceptible	Resistant	Resistant	Susceptible	2016-05-15 16:22:25	Equine	Thoroughbred	NULL	NULL	NULL	Sensitivity	Lung	Bacterium	2016	5	15	0	1	1	1	0	0	0	1	0	0	0	1	1	0	0	1	1
Lung	Susceptible	Intermediate	No Interpretation	Resistant	Resistant	No Interpretation	Susceptible	Susceptible	Susceptible	Intermediate	Susceptible	Susceptible	Susceptible	Resistant	Resistant	Susceptible	Susceptible	Intermediate	Intermediate	Susceptible	2015-06-02 08:09:10	Equine	Thoroughbred	60	Days	Male	Sensitivity	Lung	Bacterium	2015	6	2	0	1	1	1	0	0	0	1	0	0	0	1	1	0	0	1	1
Abscess	Susceptible	Resistant	No Interpretation	Resistant	Resistant	No Interpretation	Susceptible	Susceptible	Susceptible	Susceptible	Susceptible	Susceptible	Susceptible	Resistant	Resistant	Susceptible	Susceptible	Resistant	Resistant	Susceptible	2013-05-11 09:56:29	Equine	Thoroughbred	2	Months	Female	Sensitivity	Abscess	Bacterium	2013	5	11	0	1	1	1	0	0	0	0	0	0	0	1	1	0	0	1	1
Joint	Susceptible	Resistant	No Interpretation	Resistant	Resistant	No Interpretation	Susceptible	Susceptible	Susceptible	Intermediate	Susceptible	Susceptible	Susceptible	Resistant	Resistant	Susceptible	Susceptible	Resistant	Intermediate	Susceptible	2016-05-18 10:42:03	Equine	Thoroughbred	3	Months	Male	Sensitivity	Joint	Bacterium	2016	5	18	0	1	1	1	0	0	0	1	0	0	0	1	1	0	0	1	1
Transtrachea	Susceptible	Resistant	No Interpretation	Resistant	Resistant	No Interpretation	Susceptible	Susceptible	Susceptible	Susceptible	Susceptible	Susceptible	Susceptible	Resistant	Resistant	Susceptible	Susceptible	Resistant	Resistant	Susceptible	2014-06-04 10:53:38	Equine	Mixed Breed	5	Weeks	NULL	Sensitivity	Transtrachea	Bacterium	2014	6	4	0	1	1	1	0	0	0	0	0	0	0	1	1	0	0	1	1
Lung	Susceptible	Resistant	No Interpretation	Resistant	Resistant	No Interpretation	Susceptible	Susceptible	Susceptible	Intermediate	Susceptible	Susceptible	Susceptible	Resistant	Resistant	Susceptible	Susceptible	Resistant	Resistant	Susceptible	2015-06-12 12:01:25	Equine	Thoroughbred	NULL	NULL	Female	Sensitivity	Lung	Bacterium	2015	6	12	0	1	1	1	0	0	0	1	0	0	0	1	1	0	0	1	1
Abscess	Susceptible	Resistant	No Interpretation	Resistant	Resistant	No Interpretation	Susceptible	Susceptible	Susceptible	Intermediate	Susceptible	Susceptible	Susceptible	Resistant	Resistant	Susceptible	Susceptible	Resistant	Resistant	Resistant	2012-05-14 11:24:26	Equine	Thoroughbred	3	Months	Female	Sensitivity	Abscess	Bacterium	2012	5	14	0	1	1	1	0	0	0	1	0	0	0	1	1	0	0	1	1
Lung	Susceptible	Resistant	No Interpretation	Resistant	Resistant	No Interpretation	Resistant	Resistant	Susceptible	Intermediate	Resistant	Susceptible	Susceptible	Resistant	Resistant	Resistant	Susceptible	Intermediate	Resistant	Susceptible	2015-06-16 11:41:03	Equine	Thoroughbred	49	Days	Female	Sensitivity	Lung	Bacterium	2015	6	16	0	1	1	1	1	1	0	1	1	0	0	1	1	1	0	1	1
Lung	Susceptible	Resistant	No Interpretation	Resistant	Resistant	No Interpretation	Resistant	Susceptible	Susceptible	Intermediate	Susceptible	Susceptible	Susceptible	Resistant	Resistant	Susceptible	Susceptible	Resistant	Resistant	Resistant	2012-05-15 11:26:49	Equine	Thoroughbred	3	Months	Female	Sensitivity	Lung	Bacterium	2012	5	15	0	1	1	1	1	0	0	1	0	0	0	1	1	0	0	1	1
Lymph node	Susceptible	Resistant	No Interpretation	Resistant	Resistant	No Interpretation	Susceptible	Susceptible	Susceptible	Intermediate	Susceptible	Susceptible	Susceptible	Resistant	Resistant	Susceptible	Susceptible	Resistant	Resistant	Resistant	2017-05-28 16:19:00	Equine	Thoroughbred	3	Months	Female	Sensitivity	Lymph node	Bacterium	2017	5	28	0	1	1	1	0	0	0	1	0	0	0	1	1	0	0	1	1
Lung	Susceptible	Resistant	No Interpretation	Resistant	Resistant	No Interpretation	Susceptible	Susceptible	Susceptible	Intermediate	Susceptible	Susceptible	Susceptible	Resistant	Resistant	Susceptible	Susceptible	Resistant	Resistant	Susceptible	2017-05-28 16:19:58	Equine	Thoroughbred	2	Months	Male	Sensitivity	Lung	Bacterium	2017	5	28	0	1	1	1	0	0	0	1	0	0	0	1	1	0	0	1	1
	Susceptible	Intermediate	No Interpretation	Intermediate	Resistant	No Interpretation	Susceptible	Resistant	Susceptible	Intermediate	Resistant	Susceptible	Susceptible	Susceptible	Resistant	Resistant	Resistant	Intermediate	Intermediate	Resistant	2015-06-17 16:40:56	Equine	Thoroughbred	2	Months	Female	Sensitivity	NULL	Bacterium	2015	6	17	0	1	1	1	0	1	0	1	1	0	0	0	1	1	1	1	1
	Susceptible	Resistant	No Interpretation	Resistant	Resistant	No Interpretation	Susceptible	Susceptible	Susceptible	Intermediate	Susceptible	Susceptible	Susceptible	Resistant	Resistant	Susceptible	Susceptible	Intermediate	Intermediate	Resistant	2015-06-18 11:06:26	Equine	Thoroughbred	1	Months	Male	Sensitivity	NULL	Bacterium	2015	6	18	0	1	1	1	0	0	0	1	0	0	0	1	1	0	0	1	1
	Susceptible	Resistant	No Interpretation	Resistant	Resistant	No Interpretation	Susceptible	Susceptible	Susceptible	Intermediate	Susceptible	Susceptible	Susceptible	Resistant	Resistant	Susceptible	Susceptible	Intermediate	Intermediate	Susceptible	2015-06-18 11:46:41	Equine	Thoroughbred	3	Months	Male	Sensitivity	NULL	Bacterium	2015	6	18	0	1	1	1	0	0	0	1	0	0	0	1	1	0	0	1	1
Abscess	Susceptible	Resistant	No Interpretation	Resistant	Resistant	No Interpretation	Susceptible	Susceptible	Susceptible	Susceptible	Susceptible	Susceptible	Susceptible	Resistant	Resistant	Susceptible	Susceptible	Intermediate	Intermediate	Susceptible	2016-05-29 13:09:55	Equine	Thoroughbred	2	Months	Female	Sensitivity	Abscess	Bacterium	2016	5	29	0	1	1	1	0	0	0	0	0	0	0	1	1	0	0	1	1
	Susceptible	Resistant	No Interpretation	Resistant	Resistant	No Interpretation	Susceptible	Susceptible	Susceptible	Resistant	Susceptible	Susceptible	Susceptible	Resistant	Resistant	Susceptible	Susceptible	Resistant	Resistant	Resistant	2017-05-31 09:20:47	Equine	Thoroughbred	1	Months	Male	Sensitivity	NULL	Bacterium	2017	5	31	0	1	1	1	0	0	0	1	0	0	0	1	1	0	0	1	1
Colon	Susceptible	Intermediate	No Interpretation	Resistant	Resistant	No Interpretation	Susceptible	Susceptible	Susceptible	Intermediate	Susceptible	Susceptible	Susceptible	Resistant	Resistant	Susceptible	Susceptible	Intermediate	Intermediate	Susceptible	2016-05-31 15:02:23	Equine	Thoroughbred	3	Months	Female	Sensitivity	Colon	Bacterium	2016	5	31	0	1	1	1	0	0	0	1	0	0	0	1	1	0	0	1	1
Lung	Susceptible	Resistant	No Interpretation	Resistant	Resistant	No Interpretation	Resistant	Resistant	Susceptible	Intermediate	Resistant	Resistant	Susceptible	Resistant	Resistant	Resistant	Intermediate	Resistant	Resistant	Resistant	2014-06-19 09:41:07	Equine	Thoroughbred	10	Weeks	Male	Sensitivity	Lung	Bacterium	2014	6	19	0	1	1	1	1	1	0	1	1	1	0	1	1	1	1	1	1
Lung	Susceptible	Resistant	No Interpretation	Resistant	Resistant	No Interpretation	Susceptible	Susceptible	Susceptible	Intermediate	Susceptible	Susceptible	Susceptible	Resistant	Resistant	No Interpretation	Susceptible	Resistant	Resistant	Susceptible	2017-06-01 12:33:16	Equine	Thoroughbred	10	Weeks	Male	Sensitivity	Lung	Bacterium	2017	6	1	0	1	1	1	0	0	0	1	0	0	0	1	1		0	1	1
Colon	Susceptible	Resistant	No Interpretation	Resistant	Resistant	No Interpretation	Susceptible	Susceptible	Susceptible	Resistant	Susceptible	Susceptible	Susceptible	Resistant	Resistant	Susceptible	Susceptible	Resistant	Resistant	Resistant	2017-06-02 10:59:53	Equine	Thoroughbred	2	Months	Female	Sensitivity	Colon	Bacterium	2017	6	2	0	1	1	1	0	0	0	1	0	0	0	1	1	0	0	1	1
Lung	Susceptible	Resistant	No Interpretation	Resistant	Resistant	No Interpretation	Intermediate	Susceptible	Susceptible	Intermediate	Susceptible	Susceptible	Susceptible	Resistant	Resistant	Susceptible	Intermediate	Resistant	Resistant	Resistant	2014-06-22 13:23:48	Equine	Thoroughbred	2	Months	Female	Sensitivity	Lung	Bacterium	2014	6	22	0	1	1	1	1	0	0	1	0	0	0	1	1	0	1	1	1
Abdomen	Susceptible	Resistant	No Interpretation	Resistant	Resistant	No Interpretation	Susceptible	Susceptible	Susceptible	Intermediate	Susceptible	Susceptible	Susceptible	Resistant	Resistant	Susceptible	Susceptible	Intermediate	Intermediate	Susceptible	2017-06-05 08:41:44	Equine	Thoroughbred	2	Months	Male	Sensitivity	Abdomen	Bacterium	2017	6	5	0	1	1	1	0	0	0	1	0	0	0	1	1	0	0	1	1
Lymph node	Susceptible	Resistant	No Interpretation	Resistant	Resistant	No Interpretation	Susceptible	Susceptible	Susceptible	Susceptible	Susceptible	Susceptible	Susceptible	Resistant	Resistant	Susceptible	Susceptible	Resistant	Intermediate	Susceptible	2013-06-01 15:33:25	Equine	Thoroughbred	2	Months	Male	Sensitivity	Lymph node	Bacterium	2013	6	1	0	1	1	1	0	0	0	0	0	0	0	1	1	0	0	1	1
Lung	Susceptible	Resistant	No Interpretation	Resistant	Resistant	No Interpretation	Susceptible	Susceptible	Susceptible	Susceptible	Susceptible	Susceptible	Susceptible	Resistant	Resistant	Susceptible	Susceptible	Resistant	Resistant	Susceptible	2013-06-03 10:50:49	Equine	Thoroughbred	NULL	NULL	Female	Sensitivity	Lung	Bacterium	2013	6	3	0	1	1	1	0	0	0	0	0	0	0	1	1	0	0	1	1
	Susceptible	Resistant	No Interpretation	Resistant	Resistant	No Interpretation	Susceptible	Susceptible	Susceptible	Intermediate	Susceptible	Susceptible	Susceptible	Resistant	Resistant	Susceptible	Susceptible	Resistant	Resistant	Susceptible	2016-06-04 09:21:17	Equine	Thoroughbred	2	Months	Female	Sensitivity	NULL	Bacterium	2016	6	4	0	1	1	1	0	0	0	1	0	0	0	1	1	0	0	1	1
Lung	Susceptible	Resistant	No Interpretation	Resistant	Resistant	No Interpretation	Susceptible	Susceptible	Susceptible	Intermediate	Susceptible	Susceptible	Susceptible	Resistant	Resistant	Susceptible	Susceptible	Resistant	Resistant	Susceptible	2016-06-04 09:22:47	Equine	Thoroughbred	3	Months	Male	Sensitivity	Lung	Bacterium	2016	6	4	0	1	1	1	0	0	0	1	0	0	0	1	1	0	0	1	1
Lung	Susceptible	Resistant	No Interpretation	Resistant	Resistant	No Interpretation	Susceptible	Susceptible	Susceptible	Susceptible	Susceptible	Susceptible	Susceptible	Resistant	Resistant	Susceptible	Susceptible	Resistant	Resistant	Susceptible	2015-06-26 10:19:43	Equine	Thoroughbred	NULL	NULL	NULL	Sensitivity	Lung	Bacterium	2015	6	26	0	1	1	1	0	0	0	0	0	0	0	1	1	0	0	1	1
Lung	Susceptible	Resistant	No Interpretation	Resistant	Resistant	No Interpretation	Susceptible	Susceptible	Susceptible	Intermediate	Susceptible	Susceptible	Susceptible	Resistant	Resistant	Susceptible	Susceptible	Intermediate	Intermediate	Susceptible	2017-06-06 11:02:18	Equine	Quarter Horse, American	45	Days	NULL	Sensitivity	Lung	Bacterium	2017	6	6	0	1	1	1	0	0	0	1	0	0	0	1	1	0	0	1	1
Lung	Susceptible	Resistant	No Interpretation	Resistant	Susceptible	No Interpretation	Susceptible	Susceptible	Susceptible	Intermediate	Susceptible	Susceptible	Susceptible	Resistant	Resistant	Susceptible	Susceptible	Resistant	Intermediate	Susceptible	2016-06-06 10:09:00	Equine	Thoroughbred	60	Days	NULL	Sensitivity	Lung	Bacterium	2016	6	6	0	1	1	0	0	0	0	1	0	0	0	1	1	0	0	1	1
Lung	Susceptible	Resistant	No Interpretation	Resistant	Resistant	No Interpretation	Susceptible	Susceptible	Susceptible	Susceptible	Susceptible	Susceptible	Susceptible	Resistant	Resistant	Susceptible	Susceptible	Resistant	Resistant	Susceptible	2016-06-06 10:09:53	Equine	Thoroughbred	2	Weeks	Female	Sensitivity	Lung	Bacterium	2016	6	6	0	1	1	1	0	0	0	0	0	0	0	1	1	0	0	1	1
	Susceptible	Resistant	No Interpretation	Resistant	Resistant	No Interpretation	Susceptible	Susceptible	Susceptible	Intermediate	Susceptible	Susceptible	Susceptible	Resistant	Resistant	Susceptible	Susceptible	Intermediate	Intermediate	Susceptible	2016-06-06 16:23:18	Equine	Thoroughbred	NULL	NULL	NULL	Sensitivity	NULL	Bacterium	2016	6	6	0	1	1	1	0	0	0	1	0	0	0	1	1	0	0	1	1
Lymph node	Susceptible	Resistant	No Interpretation	Resistant	Resistant	No Interpretation	Susceptible	Susceptible	Susceptible	Intermediate	Susceptible	Susceptible	Susceptible	Resistant	Resistant	Susceptible	Susceptible	Resistant	Intermediate	Susceptible	2015-06-28 16:40:54	Equine	Thoroughbred	3	Months	Female	Sensitivity	Lymph node	Bacterium	2015	6	28	0	1	1	1	0	0	0	1	0	0	0	1	1	0	0	1	1
Lung	Susceptible	Resistant	No Interpretation	Resistant	Resistant	No Interpretation	Susceptible	Susceptible	Susceptible	Intermediate	Susceptible	Susceptible	Susceptible	Resistant	Resistant	Susceptible	Susceptible	Intermediate	Resistant	Resistant	2017-06-07 14:52:17	Equine	Thoroughbred	3	Months	Male	Sensitivity	Lung	Bacterium	2017	6	7	0	1	1	1	0	0	0	1	0	0	0	1	1	0	0	1	1
Lung	Susceptible	Resistant	No Interpretation	Resistant	Resistant	No Interpretation	Susceptible	Susceptible	Susceptible	Susceptible	Susceptible	Susceptible	Susceptible	Resistant	Resistant	Susceptible	Susceptible	Resistant	Resistant	Susceptible	2013-06-05 16:49:35	Equine	Thoroughbred	NULL	NULL	NULL	Sensitivity	Lung	Bacterium	2013	6	5	0	1	1	1	0	0	0	0	0	0	0	1	1	0	0	1	1
Lung	Susceptible	Resistant	No Interpretation	Resistant	Resistant	No Interpretation	Susceptible	Susceptible	Susceptible	Susceptible	Intermediate	Susceptible	Susceptible	Resistant	Resistant	Susceptible	Susceptible	Resistant	Resistant	Susceptible	2016-06-07 15:32:25	Equine	Thoroughbred	2	Months	Female	Sensitivity	Lung	Bacterium	2016	6	7	0	1	1	1	0	0	0	0	1	0	0	1	1	0	0	1	1
Lymph node	Susceptible	Intermediate	No Interpretation	Intermediate	Resistant	No Interpretation	Susceptible	Susceptible	Susceptible	Resistant	Susceptible	Susceptible	Susceptible	Resistant	Resistant	Intermediate	Susceptible	Intermediate	Intermediate	Susceptible	2017-06-09 13:45:39	Equine	Thoroughbred	3	Months	Male	Sensitivity	Lymph node	Bacterium	2017	6	9	0	1	1	1	0	0	0	1	0	0	0	1	1	1	0	1	1
Lung	Susceptible	Resistant	No Interpretation	Resistant	Resistant	No Interpretation	Intermediate	Resistant	Susceptible	Intermediate	Resistant	Susceptible	Susceptible	Resistant	Resistant	Resistant	Susceptible	Resistant	Resistant	Susceptible	2017-06-12 09:56:59	Equine	Thoroughbred	NULL	NULL	Male	Sensitivity	Lung	Bacterium	2017	6	12	0	1	1	1	1	1	0	1	1	0	0	1	1	1	0	1	1
Lung	Susceptible	Resistant	No Interpretation	Resistant	Resistant	No Interpretation	Susceptible	Susceptible	Susceptible	Resistant	Susceptible	Susceptible	Susceptible	Resistant	Resistant	Susceptible	Susceptible	Resistant	Resistant	Susceptible	2015-07-06 13:41:46	Equine	Thoroughbred	NULL	NULL	Male	Sensitivity	Lung	Bacterium	2015	7	6	0	1	1	1	0	0	0	1	0	0	0	1	1	0	0	1	1
Abscess	Susceptible	Resistant	No Interpretation	Resistant	Resistant	No Interpretation	Susceptible	Susceptible	Susceptible	Intermediate	Susceptible	Susceptible	Susceptible	Resistant	Resistant	Susceptible	Susceptible	Resistant	Resistant	Susceptible	2012-06-03 13:48:11	Equine	Thoroughbred	90	Days	Male	Sensitivity	Abscess	Bacterium	2012	6	3	0	1	1	1	0	0	0	1	0	0	0	1	1	0	0	1	1
Lung	Susceptible	Intermediate	No Interpretation	Resistant	Resistant	No Interpretation	Susceptible	Susceptible	Susceptible	Intermediate	Susceptible	Susceptible	Susceptible	Resistant	Resistant	Susceptible	Susceptible	Intermediate	Intermediate	Susceptible	2014-07-09 15:10:13	Equine	Thoroughbred	3	Months	NULL	Sensitivity	Lung	Bacterium	2014	7	9	0	1	1	1	0	0	0	1	0	0	0	1	1	0	0	1	1
Lung	Susceptible	Resistant	No Interpretation	Resistant	Resistant	No Interpretation	Susceptible	Intermediate	Susceptible	Susceptible	Susceptible	Susceptible	Susceptible	Resistant	Resistant	Susceptible	Susceptible	Resistant	Resistant	Resistant	2012-06-04 15:16:02	Equine	Thoroughbred	NULL	NULL	Male	Sensitivity	Lung	Bacterium	2012	6	4	0	1	1	1	0	1	0	0	0	0	0	1	1	0	0	1	1
Lymph node	Resistant	Resistant	No Interpretation	Resistant	Resistant	No Interpretation	Resistant	Resistant	Susceptible	Resistant	Resistant	Intermediate	Susceptible	Resistant	Resistant	Resistant	Susceptible	Resistant	Resistant	Resistant	2014-07-11 15:07:54	Equine	Thoroughbred	2	Months	Female	Sensitivity	Lymph node	Bacterium	2014	7	11	1	1	1	1	1	1	0	1	1	1	0	1	1	1	0	1	1
Liver	Susceptible	Resistant	No Interpretation	Resistant	Resistant	No Interpretation	Susceptible	Susceptible	Susceptible	Susceptible	Susceptible	Susceptible	Susceptible	Resistant	Resistant	Susceptible	Susceptible	Resistant	Resistant	Susceptible	2012-06-06 09:55:34	Equine	Pony	2	Years	Neutered	Sensitivity	Liver	Bacterium	2012	6	6	0	1	1	1	0	0	0	0	0	0	0	1	1	0	0	1	1
Transtrachea	Susceptible	Resistant	No Interpretation	Resistant	Resistant	No Interpretation	Susceptible	Susceptible	Susceptible	Susceptible	Susceptible	Susceptible	Susceptible	Resistant	Resistant	Susceptible	Susceptible	Resistant	Intermediate	Susceptible	2014-07-15 12:36:07	Equine	NULL	8	Weeks	NULL	Sensitivity	Transtrachea	Bacterium	2014	7	15	0	1	1	1	0	0	0	0	0	0	0	1	1	0	0	1	1
Lung	Susceptible	Resistant	No Interpretation	Resistant	Resistant	No Interpretation	Intermediate	Resistant	Susceptible	Intermediate	Resistant	Susceptible	Susceptible	Resistant	Resistant	Resistant	Resistant	Resistant	Resistant	Resistant	2013-06-24 07:54:41	Equine	Thoroughbred	2	Months	Male	Sensitivity	Lung	Bacterium	2013	6	24	0	1	1	1	1	1	0	1	1	0	0	1	1	1	1	1	1
Abscess	Susceptible	Resistant	No Interpretation	Resistant	Resistant	No Interpretation	Intermediate	Susceptible	Intermediate	Intermediate	Susceptible	Susceptible	Susceptible	Resistant	Resistant	Susceptible	Susceptible	Intermediate	Intermediate	Resistant	2017-06-22 10:57:20	Equine	Thoroughbred	2	Months	Female	Sensitivity	Abscess	Bacterium	2017	6	22	0	1	1	1	1	0	1	1	0	0	0	1	1	0	0	1	1
Abscess	Susceptible	Resistant	No Interpretation	Resistant	Resistant	No Interpretation	Intermediate	Resistant	Susceptible	Intermediate	Resistant	Susceptible	Susceptible	Resistant	Resistant	Resistant	Resistant	Resistant	Resistant	Resistant	2015-07-14 15:21:43	Equine	Thoroughbred	3	Months	Male	Sensitivity	Abscess	Bacterium	2015	7	14	0	1	1	1	1	1	0	1	1	0	0	1	1	1	1	1	1
Transtrachea	Susceptible	Intermediate	No Interpretation	Resistant	Resistant	No Interpretation	Susceptible	Susceptible	Susceptible	Susceptible	Susceptible	Susceptible	Susceptible	Resistant	Resistant	Susceptible	Susceptible	Resistant	Intermediate	Susceptible	2014-07-18 11:42:21	Equine	NULL	NULL	NULL	NULL	Sensitivity	Transtrachea	Bacterium	2014	7	18	0	1	1	1	0	0	0	0	0	0	0	1	1	0	0	1	1
Lung	Susceptible	Resistant	No Interpretation	Resistant	Resistant	No Interpretation	Susceptible	Susceptible	Susceptible	Susceptible	Susceptible	Susceptible	Susceptible	Resistant	Resistant	Intermediate	Susceptible	Intermediate	Resistant	Susceptible	2017-06-23 13:20:44	Equine	Thoroughbred	6	Months	Male	Sensitivity	Lung	Bacterium	2017	6	23	0	1	1	1	0	0	0	0	0	0	0	1	1	1	0	1	1
Lymph node	Susceptible	Resistant	No Interpretation	Resistant	Resistant	No Interpretation	Intermediate	Susceptible	Susceptible	Susceptible	Susceptible	Susceptible	Susceptible	Resistant	Resistant	Susceptible	Intermediate	Resistant	Resistant	Susceptible	2012-06-13 11:25:45	Equine	Thoroughbred	3	Months	Male	Sensitivity	Lymph node	Bacterium	2012	6	13	0	1	1	1	1	0	0	0	0	0	0	1	1	0	1	1	1
Abscess	Susceptible	Intermediate	No Interpretation	Resistant	Resistant	No Interpretation	Intermediate	Susceptible	Susceptible	Intermediate	Susceptible	Susceptible	Susceptible	Resistant	Resistant	Susceptible	Susceptible	Intermediate	Intermediate	Susceptible	2016-06-27 12:13:43	Equine	Thoroughbred	3.5	Months	Male	Sensitivity	Abscess	Bacterium	2016	6	27	0	1	1	1	1	0	0	1	0	0	0	1	1	0	0	1	1
Transtrachea	Intermediate	Resistant	No Interpretation	Resistant	Resistant	No Interpretation	Susceptible	Susceptible	Susceptible	Intermediate	Susceptible	Susceptible	Susceptible	Resistant	Resistant	Susceptible	Susceptible	Resistant	Resistant	Susceptible	2014-07-22 14:07:06	Equine	NULL	NULL	NULL	NULL	Sensitivity	Transtrachea	Bacterium	2014	7	22	1	1	1	1	0	0	0	1	0	0	0	1	1	0	0	1	1
Transtrachea	Resistant	Resistant	No Interpretation	Resistant	Resistant	No Interpretation	Susceptible	Susceptible	Susceptible	Intermediate	Susceptible	Resistant	Susceptible	Resistant	Resistant	Susceptible	Susceptible	Resistant	Resistant	Susceptible	2014-07-22 14:07:06	Equine	NULL	NULL	NULL	NULL	Sensitivity	Transtrachea	Bacterium	2014	7	22	1	1	1	1	0	0	0	1	0	1	0	1	1	0	0	1	1
Transtrachea	Susceptible	Intermediate	No Interpretation	Resistant	Resistant	No Interpretation	Susceptible	Susceptible	Susceptible	Susceptible	Susceptible	Susceptible	Susceptible	Resistant	Resistant	Susceptible	Susceptible	Resistant	Resistant	Susceptible	2014-07-23 13:21:01	Equine	NULL	NULL	NULL	NULL	Sensitivity	Transtrachea	Bacterium	2014	7	23	0	1	1	1	0	0	0	0	0	0	0	1	1	0	0	1	1
	Susceptible	Resistant	No Interpretation	Resistant	Resistant	No Interpretation	Susceptible	Susceptible	Susceptible	Intermediate	Susceptible	Susceptible	Susceptible	Resistant	Resistant	Resistant	Susceptible	Intermediate	Intermediate	Susceptible	2015-07-18 16:53:57	Equine	Thoroughbred	4	Months	Male	Sensitivity	NULL	Bacterium	2015	7	18	0	1	1	1	0	0	0	1	0	0	0	1	1	1	0	1	1
Abscess	Susceptible	Intermediate	No Interpretation	Intermediate	Resistant	No Interpretation	Susceptible	Susceptible	Susceptible	Intermediate	Susceptible	Susceptible	Susceptible	Resistant	Resistant	Susceptible	Susceptible	Intermediate	Intermediate	Susceptible	2016-06-30 10:50:06	Equine	Warm Blood	NULL	NULL	Male	Sensitivity	Abscess	Bacterium	2016	6	30	0	1	1	1	0	0	0	1	0	0	0	1	1	0	0	1	1
Abscess	Susceptible	Resistant	No Interpretation	Resistant	Resistant	No Interpretation	Susceptible	Susceptible	Susceptible	Intermediate	Susceptible	Susceptible	Susceptible	Resistant	Resistant	Susceptible	Susceptible	Resistant	Resistant	Susceptible	2014-07-25 10:52:29	Equine	Thoroughbred	3	Months	Male	Sensitivity	Abscess	Bacterium	2014	7	25	0	1	1	1	0	0	0	1	0	0	0	1	1	0	0	1	1
	Susceptible	Resistant	No Interpretation	Resistant	Resistant	No Interpretation	Susceptible	Susceptible	Susceptible	Resistant	Susceptible	Susceptible	Susceptible	Resistant	Resistant	Resistant	Susceptible	Resistant	Resistant	Susceptible	2013-07-02 12:57:21	Equine	Thoroughbred	4	Months	Male	Sensitivity	NULL	Bacterium	2013	7	2	0	1	1	1	0	0	0	1	0	0	0	1	1	1	0	1	1
Bone	Susceptible	Resistant	No Interpretation	Resistant	Resistant	No Interpretation	Resistant	Resistant	Susceptible	Intermediate	Resistant	Susceptible	Susceptible	Resistant	Resistant	Resistant	Resistant	Resistant	Resistant	Resistant	2012-06-21 15:19:17	Equine	Thoroughbred	3	Months	Male	Sensitivity	Bone	Bacterium	2012	6	21	0	1	1	1	1	1	0	1	1	0	0	1	1	1	1	1	1
	Susceptible	Resistant	No Interpretation	Resistant	Resistant	No Interpretation	Susceptible	Susceptible	Susceptible	Intermediate	Susceptible	Susceptible	Susceptible	Resistant	Resistant	Susceptible	Susceptible	Intermediate	Intermediate	Susceptible	2016-07-06 13:22:48	Equine	Thoroughbred	10	Weeks	Male	Sensitivity	NULL	Bacterium	2016	7	6	0	1	1	1	0	0	0	1	0	0	0	1	1	0	0	1	1
Lung	Susceptible	Resistant	No Interpretation	Resistant	Resistant	No Interpretation	Susceptible	Susceptible	Susceptible	Intermediate	Susceptible	Susceptible	Susceptible	Resistant	Resistant	Susceptible	Susceptible	Resistant	Resistant	Susceptible	2013-07-08 13:06:52	Equine	Thoroughbred	2	Months	Female	Sensitivity	Lung	Bacterium	2013	7	8	0	1	1	1	0	0	0	1	0	0	0	1	1	0	0	1	1
Lung	Susceptible	Resistant	No Interpretation	Resistant	Resistant	No Interpretation	Susceptible	Susceptible	Susceptible	Susceptible	Susceptible	Susceptible	Susceptible	Resistant	Resistant	Susceptible	Susceptible	Resistant	Resistant	Susceptible	2017-07-06 10:53:09	Equine	Thoroughbred	2	Months	Male	Sensitivity	Lung	Bacterium	2017	7	6	0	1	1	1	0	0	0	0	0	0	0	1	1	0	0	1	1
Lung	Susceptible	Intermediate	No Interpretation	Resistant	Resistant	No Interpretation	Susceptible	Susceptible	Susceptible	Intermediate	Susceptible	Susceptible	Susceptible	Susceptible	Resistant	Susceptible	Susceptible	Intermediate	Intermediate	Susceptible	2013-07-10 13:11:37	Equine	Thoroughbred	NULL	NULL	Male	Sensitivity	Lung	Bacterium	2013	7	10	0	1	1	1	0	0	0	1	0	0	0	0	1	0	0	1	1
	Resistant	Resistant	No Interpretation	Resistant	Resistant	No Interpretation	Resistant	Susceptible	Resistant	Intermediate	Susceptible	Resistant	Susceptible	Resistant	Resistant	Intermediate	Resistant	Resistant	Resistant	Resistant	2016-06-09 13:01:23	Equine	NULL	NULL	NULL	Male	Sensitivity	NULL	Bacterium	2016	6	9	1	1	1	1	1	0	1	1	0	1	0	1	1	1	1	1	1
Lung	Susceptible	Resistant	No Interpretation	Resistant	Resistant	No Interpretation	Intermediate	Susceptible	Susceptible	Resistant	Susceptible	Susceptible	Susceptible	Resistant	Resistant	Susceptible	Susceptible	Resistant	Resistant	Susceptible	2017-06-20 10:19:39	Equine	Rocky Mountain Horse	1	Months	Female	Sensitivity	Lung	Bacterium	2017	6	20	0	1	1	1	1	0	0	1	0	0	0	1	1	0	0	1	1
Lung	Susceptible	Resistant	No Interpretation	Resistant	Resistant	No Interpretation	Susceptible	Susceptible	Susceptible	Resistant	Susceptible	Susceptible	Susceptible	Resistant	Resistant	Susceptible	Susceptible	Resistant	Resistant	Susceptible	2012-08-17 16:13:45	Equine	Rocky Mountain Horse	30	Days	NULL	Sensitivity	Lung	Bacterium	2012	8	17	0	1	1	1	0	0	0	1	0	0	0	1	1	0	0	1	1
Lung	Susceptible	Resistant	No Interpretation	Resistant	Resistant	No Interpretation	Susceptible	Susceptible	Susceptible	Intermediate	Susceptible	Susceptible	Susceptible	Susceptible	Resistant	Resistant	Resistant	Resistant	Resistant	Susceptible	2012-06-27 12:32:00	Equine	Thoroughbred	60	Days	Male	Sensitivity	Lung	Bacterium	2012	6	27	0	1	1	1	0	0	0	1	0	0	0	0	1	1	1	1	1
	Susceptible	Resistant	No Interpretation	Resistant	Resistant	No Interpretation	Susceptible	Susceptible	Susceptible	Resistant	Intermediate	Susceptible	Susceptible	Resistant	Resistant	Susceptible	Susceptible	Resistant	Intermediate	Resistant	2014-10-17 15:32:55	Equine	Quarter Horse, American	3	Years	Female	Sensitivity	NULL	Bacterium	2014	10	17	0	1	1	1	0	0	0	1	1	0	0	1	1	0	0	1	1
Lung	Susceptible	Resistant	No Interpretation	Resistant	Resistant	No Interpretation	Intermediate	Susceptible	Susceptible	Resistant	Susceptible	Susceptible	Susceptible	Resistant	Resistant	Susceptible	Susceptible	Resistant	Resistant	Resistant	2014-10-20 10:17:14	Equine	Tennessee Walking Horse	7	Weeks	Male	Sensitivity	Lung	Bacterium	2014	10	20	0	1	1	1	1	0	0	1	0	0	0	1	1	0	0	1	1
Abscess	Susceptible	Resistant	No Interpretation	Resistant	Resistant	No Interpretation	Intermediate	Susceptible	Susceptible	Resistant	Susceptible	Susceptible	Susceptible	Resistant	Resistant	Susceptible	Susceptible	Intermediate	Resistant	Susceptible	2016-02-16 12:03:17	Equine	Tennessee Walking Horse	4	Months	Male	Sensitivity	Abscess	Bacterium	2016	2	16	0	1	1	1	1	0	0	1	0	0	0	1	1	0	0	1	1
Abscess	Susceptible	Intermediate	No Interpretation	Resistant	Resistant	No Interpretation	Susceptible	Susceptible	Susceptible	Susceptible	Susceptible	Susceptible	Susceptible	Susceptible	Resistant	Susceptible	Susceptible	Intermediate	Intermediate	Susceptible	2016-04-14 16:24:37	Equine	Tennessee Walking Horse	NULL	NULL	NULL	Sensitivity	Abscess	Bacterium	2016	4	14	0	1	1	1	0	0	0	0	0	0	0	0	1	0	0	1	1
Nasal	Susceptible	Resistant	No Interpretation	Resistant	Resistant	No Interpretation	Susceptible	Susceptible	Susceptible	Resistant	Susceptible	Susceptible	Susceptible	Resistant	Resistant	Susceptible	Susceptible	Resistant	Resistant	Resistant	2017-03-21 07:46:48	Equine	NULL	20	Years	Female	Sensitivity	Nasal	Bacterium	2017	3	21	0	1	1	1	0	0	0	1	0	0	0	1	1	0	0	1	1
Lung	Susceptible	Resistant	No Interpretation	Resistant	Resistant	No Interpretation	Susceptible	Susceptible	Susceptible	Intermediate	Susceptible	Susceptible	Susceptible	Resistant	Resistant	Susceptible	Susceptible	Resistant	Resistant	Susceptible	2017-07-29 12:07:34	Equine	Morgan	9	Weeks	Male	Sensitivity	Lung	Bacterium	2017	7	29	0	1	1	1	0	0	0	1	0	0	0	1	1	0	0	1	1
Abscess	Susceptible	Resistant	No Interpretation	Resistant	Resistant	No Interpretation	Intermediate	Resistant	Susceptible	Intermediate	Resistant	Susceptible	Susceptible	Resistant	Resistant	Resistant	Resistant	Resistant	Resistant	Resistant	2015-05-08 10:49:19	Equine	Thoroughbred	NULL	NULL	NULL	Sensitivity	Abscess	Bacterium	2015	5	8	0	1	1	1	1	1	0	1	1	0	0	1	1	1	1	1	1
Abscess	Susceptible	Resistant	No Interpretation	Resistant	Resistant	No Interpretation	Susceptible	Susceptible	Susceptible	Resistant	Susceptible	Susceptible	Susceptible	Resistant	Resistant	Susceptible	Susceptible	Intermediate	Intermediate	Susceptible	2012-08-24 09:11:17	Equine	Quarter Horse, American	NULL	NULL	Neutered	Sensitivity	Abscess	Bacterium	2012	8	24	0	1	1	1	0	0	0	1	0	0	0	1	1	0	0	1	1
Liver	Susceptible	Intermediate	No Interpretation	Resistant	Resistant	No Interpretation	Susceptible	Susceptible	Susceptible	Susceptible	Intermediate	Susceptible	Susceptible	Resistant	Resistant	Susceptible	Susceptible	Intermediate	Intermediate	Resistant	2013-07-14 14:20:51	Equine	Saddlebred, American	4	Months	Male	Sensitivity	Liver	Bacterium	2013	7	14	0	1	1	1	0	0	0	0	1	0	0	1	1	0	0	1	1
Joint	Intermediate	Resistant	No Interpretation	Resistant	Resistant	No Interpretation	Resistant	Resistant	Resistant	Resistant	Resistant	Resistant	Susceptible	Resistant	Resistant	Resistant	Resistant	Resistant	Resistant	Susceptible	2015-08-20 11:39:34	Equine	Thoroughbred	6	Months	Female	Sensitivity	Joint	Bacterium	2015	8	20	1	1	1	1	1	1	1	1	1	1	0	1	1	1	1	1	1
Lung	Susceptible	Intermediate	No Interpretation	Intermediate	Resistant	No Interpretation	Susceptible	Susceptible	Susceptible	Intermediate	Susceptible	Susceptible	Susceptible	Resistant	Resistant	Susceptible	Susceptible	Susceptible	Intermediate	Susceptible	2012-07-30 13:12:00	Equine	Thoroughbred	4	Months	Male	Sensitivity	Lung	Bacterium	2012	7	30	0	1	1	1	0	0	0	1	0	0	0	1	1	0	0	0	1
Abscess	Susceptible	Resistant	No Interpretation	Resistant	Resistant	No Interpretation	Susceptible	Susceptible	Susceptible	Susceptible	Susceptible	Susceptible	Susceptible	Resistant	Resistant	Susceptible	Susceptible	Resistant	Resistant	Susceptible	2012-09-19 11:26:00	Equine	Thoroughbred	NULL	NULL	Female	Sensitivity	Abscess	Bacterium	2012	9	19	0	1	1	1	0	0	0	0	0	0	0	1	1	0	0	1	1
Lung	Susceptible	Resistant	No Interpretation	Resistant	Resistant	No Interpretation	Intermediate	Susceptible	Susceptible	Intermediate	Susceptible	Susceptible	Susceptible	Resistant	Resistant	Susceptible	Intermediate	Resistant	Resistant	Resistant	2017-10-06 15:31:16	Equine	Standardbred	23	Years	Female	Sensitivity	Lung	Bacterium	2017	10	6	0	1	1	1	1	0	0	1	0	0	0	1	1	0	1	1	1
Lung	Susceptible	Resistant	No Interpretation	Resistant	Resistant	No Interpretation	Susceptible	Intermediate	Susceptible	Intermediate	Intermediate	Resistant	Susceptible	Resistant	Resistant	Susceptible	Resistant	Resistant	Resistant	Susceptible	2013-03-15 12:29:35	Equine	Thoroughbred	2	Months	Female	Sensitivity	Lung	Bacterium	2013	3	15	0	1	1	1	0	1	0	1	1	1	0	1	1	0	1	1	1
Liver	Susceptible	Intermediate	No Interpretation	Intermediate	Resistant	No Interpretation	Susceptible	Susceptible	Susceptible	Intermediate	Susceptible	Susceptible	Susceptible	Susceptible	Resistant	Susceptible	Susceptible	Intermediate	Susceptible	Susceptible	2015-04-08 08:27:01	Equine	Thoroughbred	1	Months	Female	Sensitivity	Liver	Bacterium	2015	4	8	0	1	1	1	0	0	0	1	0	0	0	0	1	0	0	1	0
Lung	Susceptible	Resistant	No Interpretation	Resistant	Resistant	No Interpretation	Susceptible	Susceptible	Susceptible	Susceptible	Susceptible	Susceptible	Susceptible	Resistant	Resistant	Susceptible	Susceptible	Resistant	Resistant	Susceptible	2014-05-08 13:55:36	Equine	Thoroughbred	1.5	Months	Female	Sensitivity	Lung	Bacterium	2014	5	8	0	1	1	1	0	0	0	0	0	0	0	1	1	0	0	1	1
Lung	Susceptible	Resistant	No Interpretation	Resistant	Resistant	No Interpretation	Susceptible	Susceptible	Susceptible	Intermediate	Susceptible	Susceptible	Susceptible	Resistant	Resistant	Susceptible	Susceptible	Resistant	Resistant	Resistant	2015-05-24 13:07:55	Equine	Thoroughbred	2.5	Months	Female	Sensitivity	Lung	Bacterium	2015	5	24	0	1	1	1	0	0	0	1	0	0	0	1	1	0	0	1	1
Lung	Susceptible	Intermediate	No Interpretation	Intermediate	Resistant	No Interpretation	Intermediate	Resistant	Susceptible	Intermediate	Resistant	Susceptible	Susceptible	Resistant	Resistant	Resistant	Resistant	Intermediate	Intermediate	Resistant	2016-06-12 13:51:00	Equine	Thoroughbred	3	Months	NULL	Sensitivity	Lung	Bacterium	2016	6	12	0	1	1	1	1	1	0	1	1	0	0	1	1	1	1	1	1
Abscess	Susceptible	Intermediate	No Interpretation	Resistant	Resistant	No Interpretation	Susceptible	Susceptible	Susceptible	Intermediate	Susceptible	Susceptible	Susceptible	Resistant	Resistant	Susceptible	Susceptible	Intermediate	Intermediate	Susceptible	2013-06-28 11:14:43	Equine	Saddlebred, American	3	Months	Male	Sensitivity	Abscess	Bacterium	2013	6	28	0	1	1	1	0	0	0	1	0	0	0	1	1	0	0	1	1
Lung	Susceptible	Intermediate	No Interpretation	Resistant	Resistant	No Interpretation	Intermediate	Susceptible	Susceptible	Resistant	Intermediate	Susceptible	Susceptible	Resistant	Resistant	Susceptible	Susceptible	Resistant	Resistant	Susceptible	2016-07-05 08:43:16	Equine	Thoroughbred	1	Months	Male	Sensitivity	Lung	Bacterium	2016	7	5	0	1	1	1	1	0	0	1	1	0	0	1	1	0	0	1	1
	Susceptible	Intermediate	No Interpretation	Resistant	Resistant	No Interpretation	Susceptible	Resistant	Susceptible	Intermediate	Resistant	Susceptible	Susceptible	Resistant	Resistant	Resistant	Resistant	Resistant	Resistant	Resistant	2017-07-02 13:59:27	Equine	Thoroughbred	2	Months	Female	Sensitivity	NULL	Bacterium	2017	7	2	0	1	1	1	0	1	0	1	1	0	0	1	1	1	1	1	1
Lung	Susceptible	Resistant	No Interpretation	Resistant	Resistant	No Interpretation	Susceptible	Susceptible	Susceptible	Susceptible	Susceptible	Susceptible	Susceptible	Resistant	Resistant	Resistant	Susceptible	Resistant	Resistant	Susceptible	2013-07-06 10:34:30	Equine	Thoroughbred	5	Months	Male	Sensitivity	Lung	Bacterium	2013	7	6	0	1	1	1	0	0	0	0	0	0	0	1	1	1	0	1	1
[truncated: 16 more columns]
