# Supplementary material for: Antimicrobial resistance among Streptococcus equi subspecies zooepidemicus and Rhodococcus equi isolated from equine specimens submitted to a diagnostic laboratory in Kentucky, USA
Source: PeerJ. 2022 Sep 21;10:e13682. doi: 10.7717/peerj.13682 (PMC9508889; doi:10.7717/peerj.13682)
Supplement: Supplemental Information 2 [file peerj-10-13682-s002.xlsx]

## Sheet: strepzoo_export
intAmikacin	intAmpicill	intAzithrom	intCefazoli	intCeftazid	intCeftiofu	intChloramp	intClarithr	intDoxycycl	intEnroflox	intErythrom	intGentamic	intImipenem	intOxacilli	intPenicill	intRifampin	intTetracyc	intTicarcil	intTicarCla	intTMS	intChlortet	intClindamy	intFlorfeni	intNeomycin	intOxytetra	intSulphadi	intTiamulin	intTilmicos	intClavamox	intCefoxiti	intCephalot	intMarboflo	SubmittedDate	Species	Breed	Age	AgeType	Sex	ProcedureName	SpecimenSource	SpecimenType	NewOrg	AgeWks	NewBreed	Amikacin	Ampicillin	Azithro	Cefazolin	Ceftazidime	Ceftiofur
Resistant	Susceptible	Susceptible	Susceptible	Susceptible	Susceptible	Intermediate	Resistant	Resistant	Resistant	Susceptible	Resistant	Susceptible	Susceptible	Susceptible	Resistant	Resistant	Susceptible	Resistant	Resistant													2017-01-14 09:01:42	Equine	Thoroughbred	1	Years	Female	Sensitivity	Lung	Bacterium	Strep. equi ss zooepidemicus	52	TB	1	0	0	0	0	0
																																2016-01-02 09:36:29	Equine	Thoroughbred	NULL	NULL	NULL	Sensitivity	Lung	Bacterium	Strep. equi ss zooepidemicus		TB
Intermediate	Susceptible	Susceptible	Susceptible	Susceptible	Susceptible	Intermediate	No Interpretation	Intermediate	Resistant	Susceptible	Intermediate	Susceptible	Susceptible	Susceptible	Susceptible	Resistant	Susceptible	Susceptible	Susceptible													2013-07-14 14:20:51	Equine	Saddlebred, American	4	Months	Male	Sensitivity	Trachea	Bacterium	Strep. equi ss zooepidemicus	16	Saddl	1	0	0	0	0	0
Susceptible	Susceptible	Susceptible	Susceptible	Susceptible	Susceptible	Susceptible	No Interpretation	Intermediate	Intermediate	Susceptible	Susceptible	Susceptible	Susceptible	Susceptible	Susceptible	Resistant	Susceptible	Susceptible	Susceptible													2012-06-28 13:32:33	Equine	Thoroughbred	73	Days	NULL	Sensitivity	Lung	Bacterium	Strep. equi ss zooepidemicus	10.4286	TB	0	0	0	0	0	0
Susceptible	Susceptible	Susceptible	Susceptible	Susceptible	Susceptible	Susceptible	No Interpretation	Resistant	Resistant	Susceptible	Intermediate	Susceptible	Susceptible	Susceptible	Susceptible	Resistant	Susceptible	Susceptible	Susceptible													2015-08-03 13:16:54	Equine	Saddlebred, American	3	Years	Male	Sensitivity	Lung	Bacterium	Strep. equi ss zooepidemicus	156	Saddl	0	0	0	0	0	0
Intermediate	Susceptible	Susceptible	Susceptible	Susceptible	Susceptible	Susceptible	No Interpretation	Susceptible	Resistant	Susceptible	Susceptible	Susceptible	Susceptible	Susceptible	Susceptible	Susceptible	Susceptible	Susceptible	Susceptible													2013-07-19 10:00:27	Equine	Quarter Horse, American	7	Years	Female	Sensitivity	Nasal	Bacterium	Strep. equi ss zooepidemicus	364	QH	1	0	0	0	0	0
Resistant	Susceptible	Susceptible	Susceptible	Susceptible	No Interpretation	Intermediate	No Interpretation	Resistant	Resistant	Susceptible	Resistant	Susceptible	Susceptible	Susceptible	Susceptible	Resistant	Susceptible	Susceptible	Susceptible													2017-07-17 08:07:07	Equine	Grade	12	Years	Male	Sensitivity	Lung	Bacterium	Strep. equi ss zooepidemicus	624	Mixed	1	0	0	0	0
Susceptible	Susceptible	Intermediate	Susceptible	Susceptible	No Interpretation	Susceptible	No Interpretation	Susceptible	Resistant	Susceptible	Intermediate	Susceptible	Susceptible	Intermediate	Susceptible	Resistant	Susceptible	Susceptible	Resistant													2015-08-06 10:24:27	Equine	Quarter Horse, American	8	Years	Female	Sensitivity	Transtrachea	Bacterium	Strep. equi ss zooepidemicus	416	QH	0	0	1	0	0
Resistant	Susceptible	Susceptible	Susceptible	Susceptible	Susceptible	Susceptible	No Interpretation	Susceptible	Resistant	Susceptible	Resistant	Susceptible	Susceptible	Susceptible	Susceptible	Resistant	Susceptible	Susceptible	Susceptible													2016-07-19 10:14:46	Equine	Saddlebred, American	8	Years	Male	Sensitivity	Trachea	Bacterium	Strep. equi ss zooepidemicus	416	Saddl	1	0	0	0	0	0
Susceptible	Susceptible	Susceptible	Susceptible	Susceptible	Susceptible	Susceptible	No Interpretation	Susceptible	Intermediate	Susceptible	Susceptible	Susceptible	Susceptible	Susceptible	Susceptible	Intermediate	Susceptible	Susceptible	Resistant													2015-08-08 09:10:37	Equine	Thoroughbred	3.5	Months	Female	Sensitivity	Lung	Bacterium	Strep. equi ss zooepidemicus	14	TB	0	0	0	0	0	0
Resistant	Susceptible	Susceptible	Susceptible	Susceptible	Susceptible	Intermediate	No Interpretation	Susceptible	Intermediate	Susceptible	Resistant	Susceptible	Susceptible	Susceptible	Susceptible	Resistant	Susceptible	Susceptible	Resistant													2017-07-18 12:20:00	Equine	Thoroughbred	4	Months	Female	Sensitivity	Nasal	Bacterium	Strep. equi ss zooepidemicus	16	TB	1	0	0	0	0	0
Susceptible	Susceptible	Susceptible	Susceptible	Susceptible	Susceptible	Intermediate	No Interpretation	Susceptible	Resistant	Susceptible	Susceptible	Susceptible	Susceptible	Susceptible	Susceptible	Resistant	Susceptible	Susceptible	Susceptible													2015-08-11 15:55:12	Equine	Thoroughbred	17	Years	Neutered	Sensitivity	Nasal	Bacterium	Strep. equi ss zooepidemicus	884	TB	0	0	0	0	0	0
Intermediate	Susceptible	Susceptible	Susceptible	Susceptible	Susceptible	Susceptible	No Interpretation	Resistant	Resistant	Susceptible	Intermediate	Susceptible	Susceptible	Susceptible	Susceptible	Resistant	Susceptible	Susceptible	Resistant													2015-08-13 10:57:56	Equine	NULL	NULL	NULL	NULL	Sensitivity	Nasal	Bacterium	Strep. equi ss zooepidemicus			1	0	0	0	0	0
Resistant	Susceptible	Susceptible	Susceptible	Susceptible	Susceptible	Intermediate	No Interpretation	Susceptible	Resistant	Susceptible	Intermediate	Susceptible	Susceptible	Susceptible	Susceptible	Resistant	Susceptible	Susceptible	Resistant													2013-07-31 07:49:05	Equine	Quarter Horse, American	2	Years	Female	Sensitivity	Nasal	Bacterium	Strep. equi ss zooepidemicus	104	QH	1	0	0	0	0	0
Susceptible	Susceptible	Susceptible	Susceptible	Susceptible	Susceptible	Intermediate	No Interpretation	Susceptible	Intermediate	Susceptible	Susceptible	Susceptible	Susceptible	Susceptible	Susceptible	Intermediate	Susceptible	Susceptible	Susceptible													2013-07-31 11:29:29	Equine	Thoroughbred	1	Years	Male	Sensitivity	Lung	Bacterium	Strep. equi ss zooepidemicus	52	TB	0	0	0	0	0	0
Intermediate	Susceptible	Susceptible	Susceptible	Susceptible	Susceptible	Intermediate	No Interpretation	Susceptible	Resistant	Susceptible	Intermediate	Susceptible	Susceptible	Susceptible	Susceptible	Intermediate	Susceptible	Susceptible	Resistant													2014-09-02 15:33:10	Equine	Saddlebred, American	NULL	NULL	NULL	Sensitivity	Lung	Bacterium	Strep. equi ss zooepidemicus		Saddl	1	0	0	0	0	0
Resistant	Susceptible	Susceptible	Susceptible	Susceptible	Susceptible	Intermediate	No Interpretation	Susceptible	Resistant	Susceptible	Resistant	Susceptible	Susceptible	Susceptible	Susceptible	Resistant	Susceptible	Susceptible	Susceptible													2017-07-25 13:10:53	Equine	Thoroughbred	1	Years	Female	Sensitivity	Nasal	Bacterium	Strep. equi ss zooepidemicus	52	TB	1	0	0	0	0	0
Resistant	Susceptible	Susceptible	Susceptible	Susceptible	Susceptible	Resistant	No Interpretation	Susceptible	Resistant	Susceptible	Resistant	Susceptible	Susceptible	Susceptible	Susceptible	Resistant	Susceptible	Susceptible	Resistant													2016-07-30 16:16:22	Equine	Thoroughbred	8	Years	Female	Sensitivity	Lung	Bacterium	Strep. equi ss zooepidemicus	416	TB	1	0	0	0	0	0
Susceptible	Susceptible	Susceptible	Susceptible	Susceptible	Susceptible	Susceptible	No Interpretation	Susceptible	Intermediate	Susceptible	Susceptible	Susceptible	Susceptible	Susceptible	Susceptible	Susceptible	Susceptible	Susceptible	Susceptible													2012-07-25 11:24:00	Equine	Quarter Horse, American	6	Months	Neutered	Sensitivity	Nasal	Bacterium	Strep. equi ss zooepidemicus	24	QH	0	0	0	0	0	0
Susceptible	Susceptible	Susceptible	Susceptible	Susceptible	Susceptible	Susceptible	No Interpretation	Susceptible	Resistant	Susceptible	Susceptible	Susceptible	Susceptible	Susceptible	Susceptible	Intermediate	Susceptible	Susceptible	Susceptible													2012-07-30 13:12:00	Equine	Thoroughbred	3	Months	Female	Sensitivity	Lung	Bacterium	Strep. equi ss zooepidemicus	12	TB	0	0	0	0	0	0
Intermediate	Susceptible	Susceptible	Susceptible	Susceptible	Susceptible	Intermediate	No Interpretation	Resistant	Resistant	Susceptible	Intermediate	Susceptible	Susceptible	Susceptible	Susceptible	Resistant	Susceptible	Susceptible	Susceptible													2015-01-27 10:06:32	Equine	Thoroughbred	1	Years	NULL	Sensitivity	Lung	Bacterium	Strep. equi ss zooepidemicus	52	TB	1	0	0	0	0	0
Intermediate	Susceptible	Susceptible	Susceptible	Susceptible	Susceptible	Intermediate	No Interpretation	Susceptible	Resistant	Susceptible	Resistant	Susceptible	Susceptible	Susceptible	Susceptible	Resistant	Susceptible	Susceptible	Susceptible													2012-08-01 10:36:57	Equine	NULL	9	Years	Neutered	Sensitivity	Nasal	Bacterium	Strep. equi ss zooepidemicus	468		1	0	0	0	0	0
Susceptible	Susceptible	Susceptible	Susceptible	Susceptible	Susceptible	Susceptible	No Interpretation	Resistant	Resistant	Susceptible	Susceptible	Susceptible	Susceptible	Susceptible	Susceptible	Resistant	Susceptible	Susceptible	Susceptible													2015-09-04 11:19:34	Equine	Thoroughbred	NULL	NULL	NULL	Sensitivity	Lung	Bacterium	Strep. equi ss zooepidemicus		TB	0	0	0	0	0	0
Resistant	Susceptible	Susceptible	Susceptible	Susceptible	No Interpretation	Resistant	No Interpretation	Resistant	Resistant	Susceptible	Resistant	Susceptible	Susceptible	Susceptible	Susceptible	Resistant	Susceptible	Susceptible	Resistant													2014-09-26 08:42:27	Equine	Thoroughbred	NULL	NULL	Female	Sensitivity	Lung	Bacterium	Strep. equi ss zooepidemicus		TB	1	0	0	0	0
Intermediate	Susceptible	Susceptible	Susceptible	Susceptible	Susceptible	Susceptible	No Interpretation	Intermediate	Resistant	Susceptible	Susceptible	Susceptible	Susceptible	Susceptible	Susceptible	Resistant	Susceptible	Susceptible	Susceptible													2013-08-30 13:09:59	Equine	Thoroughbred	3	Years	Female	Sensitivity	Lung	Bacterium	Strep. equi ss zooepidemicus	156	TB	1	0	0	0	0	0
Susceptible	Susceptible	Susceptible	Susceptible	Susceptible	Susceptible	Susceptible	No Interpretation	Susceptible	Susceptible	Susceptible	Susceptible	Susceptible	Susceptible	Susceptible	Susceptible	Susceptible	Susceptible	Susceptible	Susceptible													2017-08-16 08:41:36	Equine	Saddlebred, American	4	Months	Female	Sensitivity	Transtrachea	Bacterium	Strep. equi ss zooepidemicus	16	Saddl	0	0	0	0	0	0
Resistant	Susceptible	Susceptible	Susceptible	Susceptible	Susceptible	Susceptible	No Interpretation	Susceptible	Resistant	Susceptible	Resistant	Susceptible	Susceptible	Susceptible	Susceptible	Resistant	Susceptible	Susceptible	Susceptible													2017-08-18 11:28:45	Equine	Thoroughbred	NULL	NULL	Male	Sensitivity	Lung	Bacterium	Strep. equi ss zooepidemicus		TB	1	0	0	0	0	0
Susceptible	Susceptible	Susceptible	Susceptible	Susceptible	No Interpretation	Susceptible	No Interpretation	Susceptible	Intermediate	Susceptible	Susceptible	Susceptible	Susceptible	Susceptible	No Interpretation	Resistant	Susceptible	Susceptible	Susceptible													2012-08-16 07:59:00	Equine	NULL	NULL	NULL	NULL	Sensitivity	Nasal	Bacterium	Strep. equi ss zooepidemicus			0	0	0	0	0
Intermediate	Susceptible	Susceptible	Susceptible	Susceptible	Susceptible	Intermediate	No Interpretation	Susceptible	Resistant	Susceptible	Intermediate	Susceptible	Susceptible	Susceptible	Susceptible	Resistant	Susceptible	Susceptible	Susceptible													2012-08-17 16:13:45	Equine	Rocky Mountain Horse	30	Days	NULL	Sensitivity	Lung	Bacterium	Strep. equi ss zooepidemicus	4.28571	RMH	1	0	0	0	0	0
Susceptible	Susceptible	Susceptible	Susceptible	Susceptible	Susceptible	Susceptible	No Interpretation	Susceptible	Intermediate	Susceptible	Susceptible	Susceptible	Susceptible	Susceptible	Susceptible	Resistant	Susceptible	Susceptible	Susceptible													2012-08-18 11:16:07	Equine	Thoroughbred	5	Years	Neutered	Sensitivity	Lung	Bacterium	Strep. equi ss zooepidemicus	260	TB	0	0	0	0	0	0
Intermediate	Susceptible	Susceptible	Susceptible	Susceptible	Susceptible	Intermediate	No Interpretation	Susceptible	Resistant	Susceptible	Intermediate	Susceptible	Susceptible	Susceptible	Susceptible	Resistant	Susceptible	Susceptible	Susceptible													2014-01-29 10:17:56	Equine	Thoroughbred	1	Years	Female	Sensitivity	Nasal	Bacterium	Strep. equi ss zooepidemicus	52	TB	1	0	0	0	0	0
Resistant	Susceptible	Susceptible	Susceptible	Susceptible	Susceptible	Intermediate	No Interpretation	Susceptible	Resistant	Susceptible	Resistant	Susceptible	Susceptible	Susceptible	Susceptible	Resistant	Susceptible	Susceptible	Susceptible													2014-01-29 10:17:56	Equine	Thoroughbred	1	Years	Female	Sensitivity	Nasal	Bacterium	Strep. equi ss zooepidemicus	52	TB	1	0	0	0	0	0
Resistant	Susceptible	Susceptible	Susceptible	Susceptible	Susceptible	Intermediate	No Interpretation	Susceptible	Resistant	Susceptible	Resistant	Susceptible	Susceptible	Susceptible	Intermediate	Resistant	Susceptible	Susceptible	Resistant													2017-08-25 13:54:26	Equine	Thoroughbred	7	Months	Male	Sensitivity	Lung	Bacterium	Strep. equi ss zooepidemicus	28	TB	1	0	0	0	0	0
Resistant	Susceptible	Susceptible	Susceptible	Susceptible	Susceptible	Intermediate	No Interpretation	Susceptible	Resistant	Susceptible	Intermediate	Susceptible	Susceptible	Susceptible	Susceptible	Resistant	Susceptible	Susceptible	Susceptible													2014-10-17 10:25:36	Equine	Paint Horse, American	20	Years	Female	Sensitivity	Lung	Bacterium	Strep. equi ss zooepidemicus	1040	Other	1	0	0	0	0	0
Intermediate	Susceptible	Susceptible	Susceptible	Susceptible	Susceptible	Susceptible	No Interpretation	Susceptible	Intermediate	Susceptible	Susceptible	Susceptible	Susceptible	Susceptible	Susceptible	Susceptible	Susceptible	Susceptible	Susceptible													2015-09-25 09:25:22	Equine	Thoroughbred	NULL	NULL	NULL	Sensitivity	Lung	Bacterium	Strep. equi ss zooepidemicus		TB	1	0	0	0	0	0
Susceptible	Susceptible	Susceptible	Susceptible	Susceptible	Susceptible	Susceptible	No Interpretation	Susceptible	Intermediate	Susceptible	Susceptible	Susceptible	Susceptible	Susceptible	Susceptible	Susceptible	Susceptible	Susceptible	Susceptible													2012-08-30 15:59:00	Equine	Thoroughbred	14	Years	Neutered	Sensitivity	Lung	Bacterium	Strep. equi ss zooepidemicus	728	TB	0	0	0	0	0	0
Susceptible	Susceptible	Susceptible	Susceptible	Susceptible	Susceptible	Susceptible	No Interpretation	Susceptible	Resistant	Susceptible	Susceptible	Susceptible	Susceptible	Susceptible	Susceptible	Susceptible	Susceptible	Susceptible	Susceptible													2012-08-31 13:35:00	Equine	NULL	2.5	Years	Male	Sensitivity	Lung	Bacterium	Strep. equi ss zooepidemicus	130		0	0	0	0	0	0
	Susceptible				Susceptible				Intermediate		Susceptible			Susceptible					Resistant	Susceptible	Susceptible	Susceptible	Susceptible	Susceptible	Resistant	Susceptible	Susceptible					2015-09-29 11:19:06	Equine	Thoroughbred	NULL	NULL	NULL	Sensitivity	Lung	Bacterium	Strep. equi ss zooepidemicus		TB		0				0
Susceptible	Susceptible	Susceptible	Susceptible	Susceptible	Susceptible	Susceptible	No Interpretation	Susceptible	Resistant	Intermediate	Resistant	Susceptible	Susceptible	Intermediate	Susceptible	Resistant	Susceptible	Susceptible	Susceptible													2016-09-12 13:40:11	Equine	Thoroughbred	NULL	NULL	NULL	Sensitivity	Lung	Bacterium	Strep. equi ss zooepidemicus		TB	0	0	0	0	0	0
Intermediate	Susceptible	Susceptible	Susceptible	Susceptible	Susceptible	Susceptible	No Interpretation	Susceptible	Resistant	Susceptible	Susceptible	Susceptible	Susceptible	Susceptible	Susceptible	Resistant	Susceptible	Susceptible	Susceptible													2013-09-30 11:31:00	Equine	Thoroughbred	6	Months	Male	Sensitivity	Transtrachea	Bacterium	Strep. equi ss zooepidemicus	24	TB	1	0	0	0	0	0
Resistant	Resistant	Susceptible	Resistant	Resistant	No Interpretation	Intermediate	No Interpretation	Susceptible	Resistant	Susceptible	Resistant	Susceptible	Resistant	Resistant	Resistant	Resistant	Resistant	Resistant	Resistant													2016-09-13 12:00:59	Equine	Saddlebred, American	3	Months	Male	Sensitivity	Lung	Bacterium	Strep. equi ss zooepidemicus	12	Saddl	1	1	0	1	1
Susceptible	Susceptible	Susceptible	Susceptible	Susceptible	Susceptible	Susceptible	No Interpretation	Susceptible	Intermediate	Susceptible	Susceptible	Susceptible	Susceptible	Susceptible	Susceptible	Susceptible	Susceptible	Susceptible	Susceptible													2013-10-05 10:10:31	Equine	Quarter Horse, American	NULL	NULL	Female	Sensitivity	Nasal	Bacterium	Strep. equi ss zooepidemicus		QH	0	0	0	0	0	0
Intermediate	Susceptible	Susceptible	Susceptible	Susceptible	Susceptible	Susceptible	No Interpretation	Resistant	Intermediate	Susceptible	Intermediate	Susceptible	Susceptible	Susceptible	Susceptible	Resistant	Susceptible	Susceptible	Susceptible													2013-10-07 14:49:52	Equine	Mixed Breed	NULL	NULL	NULL	Sensitivity	Trachea	Bacterium	Strep. equi ss zooepidemicus		Mixed	1	0	0	0	0	0
Intermediate	Susceptible	Susceptible	Susceptible	Susceptible	Susceptible	Susceptible	No Interpretation	Resistant	Intermediate	Susceptible	Intermediate	Susceptible	Susceptible	Susceptible	Susceptible	Resistant	Susceptible	Susceptible	Susceptible													2013-10-07 14:49:52	Equine	Mixed Breed	NULL	NULL	NULL	Sensitivity	Trachea	Bacterium	Strep. equi ss zooepidemicus		Mixed	1	0	0	0	0	0
Intermediate	Susceptible	Susceptible	Susceptible	Susceptible	Susceptible	Susceptible	No Interpretation	Intermediate	Intermediate	Susceptible	Susceptible	Susceptible	Susceptible	Susceptible	Susceptible	Resistant	Susceptible	Susceptible	Susceptible													2013-10-07 14:49:52	Equine	Mixed Breed	NULL	NULL	NULL	Sensitivity	Trachea	Bacterium	Strep. equi ss zooepidemicus		Mixed	1	0	0	0	0	0
Intermediate	Susceptible	Susceptible	Susceptible	Susceptible	Susceptible	Susceptible	No Interpretation	Resistant	Intermediate	Susceptible	Susceptible	Susceptible	Susceptible	Susceptible	Susceptible	Resistant	Susceptible	Susceptible	Susceptible													2013-10-07 14:49:52	Equine	Mixed Breed	NULL	NULL	NULL	Sensitivity	Trachea	Bacterium	Strep. equi ss zooepidemicus		Mixed	1	0	0	0	0	0
Intermediate	Susceptible	Susceptible	Susceptible	Susceptible	Susceptible	Susceptible	No Interpretation	Resistant	Intermediate	Susceptible	Intermediate	Susceptible	Susceptible	Susceptible	Susceptible	Resistant	Susceptible	Susceptible	Susceptible													2013-10-07 14:49:52	Equine	Mixed Breed	NULL	NULL	NULL	Sensitivity	Trachea	Bacterium	Strep. equi ss zooepidemicus		Mixed	1	0	0	0	0	0
Intermediate	Susceptible	Susceptible	Susceptible	Susceptible	Susceptible	Susceptible	No Interpretation	Resistant	Intermediate	Susceptible	Susceptible	Susceptible	Susceptible	Susceptible	Susceptible	Resistant	Susceptible	Susceptible	Susceptible													2013-10-07 14:49:52	Equine	Mixed Breed	NULL	NULL	NULL	Sensitivity	Trachea	Bacterium	Strep. equi ss zooepidemicus		Mixed	1	0	0	0	0	0
Intermediate	Susceptible	Susceptible	Susceptible	Susceptible	Susceptible	Susceptible	No Interpretation	Resistant	Intermediate	Susceptible	Intermediate	Susceptible	Susceptible	Susceptible	Susceptible	Resistant	Susceptible	Susceptible	Susceptible													2013-10-07 14:49:52	Equine	Mixed Breed	NULL	NULL	NULL	Sensitivity	Trachea	Bacterium	Strep. equi ss zooepidemicus		Mixed	1	0	0	0	0	0
Resistant	Susceptible	Susceptible	Susceptible	Susceptible	Susceptible	Susceptible	No Interpretation	Resistant	Intermediate	Susceptible	Intermediate	Susceptible	Susceptible	Susceptible	Susceptible	Resistant	Susceptible	Susceptible	Susceptible													2013-10-08 10:51:53	Equine	Mixed Breed	NULL	NULL	NULL	Sensitivity	Trachea	Bacterium	Strep. equi ss zooepidemicus		Mixed	1	0	0	0	0	0
Susceptible	Susceptible	Susceptible	Susceptible	Susceptible	Susceptible	Susceptible	No Interpretation	Susceptible	Intermediate	Susceptible	Susceptible	Susceptible	Susceptible	Susceptible	Susceptible	Susceptible	Susceptible	Susceptible	Susceptible													2012-09-22 15:10:54	Equine	Standardbred	1	Years	Female	Sensitivity	Nasal	Bacterium	Strep. equi ss zooepidemicus	52	STB	0	0	0	0	0	0
Resistant	Susceptible	Susceptible	Susceptible	Susceptible	Susceptible	Intermediate	No Interpretation	Resistant	Resistant	Susceptible	Intermediate	Susceptible	Susceptible	Susceptible	Susceptible	Resistant	Susceptible	Susceptible	Resistant													2013-10-17 07:36:32	Equine	Thoroughbred	NULL	NULL	Male	Sensitivity	Transtrachea	Bacterium	Strep. equi ss zooepidemicus		TB	1	0	0	0	0	0
Resistant	Susceptible	Susceptible	Susceptible	Susceptible	Susceptible	Susceptible	No Interpretation	Susceptible	Resistant	Susceptible	Intermediate	Susceptible	Susceptible	Susceptible	Susceptible	Resistant	Susceptible	Susceptible	Susceptible													2014-02-02 13:57:30	Equine	Thoroughbred	1	Years	Female	Sensitivity	Lung	Bacterium	Strep. equi ss zooepidemicus	52	TB	1	0	0	0	0	0
Intermediate	Susceptible	Resistant	Susceptible	Susceptible	Susceptible	Susceptible	Resistant	Resistant	Resistant	Resistant	Intermediate	Susceptible	Susceptible	Susceptible	Susceptible	Resistant	Susceptible	Susceptible	Susceptible													2013-10-21 11:19:34	Equine	Saddle Horse, American	6	Months	Female	Sensitivity	Lung	Bacterium	Strep. equi ss zooepidemicus	24	Saddl	1	0	1	0	0	0
Resistant	Susceptible	Susceptible	Susceptible	Susceptible	No Interpretation	Susceptible	No Interpretation	Susceptible	Resistant	Susceptible	Resistant	Susceptible	Susceptible	Susceptible	Susceptible	Resistant	Susceptible	Susceptible	Resistant													2017-09-21 10:46:57	Equine	Thoroughbred	NULL	NULL	NULL	Sensitivity	Lung	Bacterium	Strep. equi ss zooepidemicus		TB	1	0	0	0	0
Resistant	Susceptible	Susceptible	Susceptible	Susceptible	No Interpretation	Intermediate	No Interpretation	Susceptible	Resistant	Susceptible	Resistant	Susceptible	Susceptible	Susceptible	Susceptible	Resistant	Susceptible	Susceptible	Resistant													2017-09-25 16:04:04	Equine	Thoroughbred	6	Months	Female	Sensitivity	Lung	Bacterium	Strep. equi ss zooepidemicus	24	TB	1	0	0	0	0
Susceptible	Susceptible	Susceptible	Susceptible	Susceptible	Susceptible	Susceptible	No Interpretation	Intermediate	Intermediate	Susceptible	Susceptible	Susceptible	Susceptible	Susceptible	Susceptible	Resistant	Susceptible	Susceptible	Susceptible													2013-10-28 12:53:07	Equine	NULL	NULL	NULL	NULL	Sensitivity	Transtrachea	Bacterium	Strep. equi ss zooepidemicus			0	0	0	0	0	0
Intermediate	Susceptible	Susceptible	Susceptible	Susceptible	Susceptible	Susceptible	No Interpretation	Resistant	Resistant	Susceptible	Susceptible	Susceptible	Susceptible	Susceptible	Susceptible	Resistant	Susceptible	Susceptible	Susceptible													2013-10-30 14:51:39	Equine	Thoroughbred	NULL	NULL	NULL	Sensitivity	Lung	Bacterium	Strep. equi ss zooepidemicus		TB	1	0	0	0	0	0
Resistant	Susceptible	Susceptible	Susceptible	Susceptible	No Interpretation	Susceptible	No Interpretation	Resistant	Resistant	Susceptible	Resistant	Susceptible	Susceptible	Susceptible	Susceptible	Resistant	Susceptible	Susceptible	Resistant													2016-01-29 11:17:44	Equine	Thoroughbred	1	Years	Male	Sensitivity	Lung	Bacterium	Strep. equi ss zooepidemicus	52	TB	1	0	0	0	0
Resistant	Resistant	Susceptible	Susceptible	Susceptible	Susceptible	Resistant	No Interpretation	Susceptible	Resistant	Susceptible	Intermediate	Susceptible	Susceptible	Susceptible	Susceptible	Resistant	Intermediate	Resistant	Susceptible													2017-01-30 16:23:35	Equine	Thoroughbred	NULL	NULL	Female	Sensitivity	Lung	Bacterium	Strep. equi ss zooepidemicus		TB	1	1	0	0	0	0
Resistant	Susceptible	Susceptible	Susceptible	Susceptible	Susceptible	Resistant	No Interpretation	Resistant	Intermediate	Susceptible	Resistant	Susceptible	Susceptible	Susceptible	Susceptible	Resistant	Susceptible	Susceptible	Susceptible													2017-10-01 14:29:03	Equine	Thoroughbred	6	Months	Female	Sensitivity	Lung	Bacterium	Strep. equi ss zooepidemicus	24	TB	1	0	0	0	0	0
Resistant	Susceptible	Susceptible	Susceptible	Susceptible	Susceptible	Intermediate	No Interpretation	Resistant	Susceptible	Susceptible	Susceptible	Susceptible	Susceptible	Susceptible	Susceptible	Resistant	Susceptible	Susceptible	Susceptible													2016-10-15 09:18:37	Equine	Thoroughbred	14	Years	Neutered	Sensitivity	Lung	Bacterium	Strep. equi ss zooepidemicus	728	TB	1	0	0	0	0	0
Susceptible	Susceptible	Susceptible	Susceptible	Susceptible	Susceptible	Intermediate	No Interpretation	Resistant	Resistant	Susceptible	Susceptible	Susceptible	Susceptible	Susceptible	Susceptible	Resistant	Susceptible	Susceptible	Resistant													2015-11-06 08:16:16	Equine	Thoroughbred	9	Months	Male	Sensitivity	Lung	Bacterium	Strep. equi ss zooepidemicus	36	TB	0	0	0	0	0	0
Resistant	Susceptible	Susceptible	Susceptible	Susceptible	Susceptible	Susceptible	No Interpretation	Intermediate	Resistant	Susceptible	Resistant	Susceptible	Susceptible	Susceptible	Susceptible	Resistant	Susceptible	Susceptible	Susceptible													2012-01-30 16:31:00	Equine	Thoroughbred	5	Years	Female	Sensitivity	Lung	Bacterium	Strep. equi ss zooepidemicus	260	TB	1	0	0	0	0	0
Intermediate	Susceptible	Susceptible	Susceptible	Susceptible	Susceptible	Susceptible	No Interpretation	Susceptible	Resistant	Susceptible	Susceptible	Susceptible	Susceptible	Susceptible	Susceptible	Susceptible	Susceptible	Susceptible	Susceptible													2012-10-16 10:07:00	Equine	Quarter Horse, American	6	Months	Male	Sensitivity	Trachea	Bacterium	Strep. equi ss zooepidemicus	24	QH	1	0	0	0	0	0
Susceptible	Susceptible	Susceptible	Susceptible	Susceptible	Susceptible	Susceptible	No Interpretation	Susceptible	Intermediate	Susceptible	Susceptible	Susceptible	Susceptible	Susceptible	Susceptible	Intermediate	Susceptible	Susceptible	Susceptible													2013-11-12 12:12:19	Equine	Thoroughbred	NULL	NULL	NULL	Sensitivity	Lung	Bacterium	Strep. equi ss zooepidemicus		TB	0	0	0	0	0	0
Resistant	Susceptible	Susceptible	Susceptible	Susceptible	No Interpretation	Intermediate	No Interpretation	Susceptible	Intermediate	Susceptible	Resistant	Susceptible	Susceptible	Susceptible	Susceptible	Resistant	Susceptible	Susceptible	Susceptible													2016-10-22 10:32:59	Equine	Thoroughbred	1	Years	Female	Sensitivity	Lung	Bacterium	Strep. equi ss zooepidemicus	52	TB	1	0	0	0	0
Resistant	Susceptible	Susceptible	Susceptible	Susceptible	Susceptible	Intermediate	No Interpretation	Susceptible	Intermediate	Susceptible	Resistant	Susceptible	Susceptible	Susceptible	Susceptible	Resistant	Susceptible	Susceptible	Susceptible													2016-10-25 10:51:14	Equine	Thoroughbred	NULL	NULL	Male	Sensitivity	Lung	Bacterium	Strep. equi ss zooepidemicus		TB	1	0	0	0	0	0
Intermediate	Susceptible	Susceptible	Susceptible	Susceptible	Susceptible	Susceptible	No Interpretation	Susceptible	Resistant	Susceptible	Intermediate	Susceptible	Susceptible	Susceptible	Susceptible	Intermediate	Susceptible	Susceptible	Susceptible													2014-12-14 15:59:51	Equine	Thoroughbred	NULL	NULL	NULL	Sensitivity	Lung	Bacterium	Strep. equi ss zooepidemicus		TB	1	0	0	0	0	0
Resistant	Susceptible	Susceptible	Susceptible	Susceptible	Susceptible	Intermediate	No Interpretation	Susceptible	Resistant	Susceptible	Resistant	Susceptible	Susceptible	Susceptible	Susceptible	Resistant	Susceptible	Susceptible	Susceptible													2017-10-12 10:02:17	Equine	Saddlebred, American	4	Years	Female	Sensitivity	Nasal	Bacterium	Strep. equi ss zooepidemicus	208	Saddl	1	0	0	0	0	0
Resistant	Susceptible	Susceptible	Susceptible	Susceptible	Susceptible	Intermediate	No Interpretation	Susceptible	Resistant	Susceptible	Resistant	Susceptible	Susceptible	Susceptible	Susceptible	Resistant	Susceptible	Susceptible	Susceptible													2016-11-05 16:13:30	Equine	Thoroughbred	NULL	NULL	NULL	Sensitivity	Lung	Bacterium	Strep. equi ss zooepidemicus		TB	1	0	0	0	0	0
Intermediate	Susceptible	Susceptible	Susceptible	Susceptible	Susceptible	Susceptible	No Interpretation	Susceptible	Resistant	Susceptible	Intermediate	Susceptible	Susceptible	Susceptible	Susceptible	Intermediate	Susceptible	Susceptible	Susceptible													2012-11-01 12:21:00	Equine	Thoroughbred	NULL	NULL	NULL	Sensitivity	Lung	Bacterium	Strep. equi ss zooepidemicus		TB	1	0	0	0	0	0
Intermediate	Susceptible	Susceptible	Susceptible	Susceptible	Susceptible	Susceptible	No Interpretation	Intermediate	Resistant	Susceptible	Susceptible	Susceptible	Susceptible	Susceptible	Susceptible	Resistant	Susceptible	Susceptible	Susceptible													2012-11-02 09:46:20	Equine	Paint Horse, American	2	Years	Neutered	Sensitivity	Lung	Bacterium	Strep. equi ss zooepidemicus	104	Other	1	0	0	0	0	0
Resistant	Susceptible	Susceptible	Susceptible	Susceptible	Susceptible	Intermediate	No Interpretation	Susceptible	Resistant	Susceptible	Resistant	Susceptible	Susceptible	Susceptible	Susceptible	Resistant	Susceptible	Susceptible	Susceptible													2016-11-08 16:58:16	Equine	Quarter Horse, American	6	Years	Female	Sensitivity	Nasal	Bacterium	Strep. equi ss zooepidemicus	312	QH	1	0	0	0	0	0
Resistant	Susceptible	Susceptible	Susceptible	Susceptible	Susceptible	Intermediate	No Interpretation	Susceptible	Resistant	Susceptible	Resistant	Susceptible	Susceptible	Susceptible	Susceptible	Resistant	Susceptible	Susceptible	Susceptible													2017-10-18 07:25:09	Equine	NULL	NULL	NULL	Neutered	Sensitivity	Nasal	Bacterium	Strep. equi ss zooepidemicus			1	0	0	0	0	0
Intermediate	Susceptible	Resistant	Susceptible	Susceptible	Susceptible	Susceptible	Resistant	Intermediate	Resistant	Resistant	Susceptible	Susceptible	Susceptible	Susceptible	Susceptible	Resistant	Susceptible	Susceptible	Resistant													2013-11-25 15:54:38	Equine	Thoroughbred	7	Months	Female	Sensitivity	Lung	Bacterium	Strep. equi ss zooepidemicus	28	TB	1	0	1	0	0	0
Resistant	Susceptible	Susceptible	Susceptible	Susceptible	Susceptible	Intermediate	No Interpretation	Resistant	Resistant	Susceptible	Resistant	Susceptible	Susceptible	Susceptible	Susceptible	Resistant	Susceptible	Susceptible	Susceptible													2015-11-25 09:22:47	Equine	Friesian	13	Years	Neutered	Sensitivity	Lung	Bacterium	Strep. equi ss zooepidemicus	676	Draft	1	0	0	0	0	0
Susceptible	Susceptible	Susceptible	Susceptible	Susceptible	Susceptible	Susceptible	No Interpretation	Susceptible	Resistant	Susceptible	Susceptible	Susceptible	Susceptible	Susceptible	Susceptible	Susceptible	Susceptible	Susceptible	Susceptible													2012-11-03 09:11:19	Equine	NULL	NULL	NULL	NULL	Sensitivity	Nasal	Bacterium	Strep. equi ss zooepidemicus			0	0	0	0	0	0
Intermediate	Susceptible	Susceptible	Susceptible	Susceptible	Susceptible	Susceptible	No Interpretation	Susceptible	Resistant	Susceptible	Susceptible	Susceptible	Susceptible	Susceptible	Susceptible	Susceptible	Susceptible	Susceptible	Susceptible													2012-11-03 09:11:19	Equine	NULL	NULL	NULL	NULL	Sensitivity	Nasal	Bacterium	Strep. equi ss zooepidemicus			1	0	0	0	0	0
Resistant	Susceptible	Susceptible	Susceptible	Susceptible	Susceptible	Resistant	No Interpretation	Resistant	Resistant	Susceptible	Resistant	Susceptible	Susceptible	Susceptible	Susceptible	Resistant	Susceptible	Susceptible	Susceptible													2015-11-27 10:40:45	Equine	Thoroughbred	3	Years	Neutered	Sensitivity	Lung	Bacterium	Strep. equi ss zooepidemicus	156	TB	1	0	0	0	0	0
Resistant	Susceptible	Susceptible	Susceptible	Susceptible	Susceptible	Resistant	No Interpretation	Resistant	Resistant	Susceptible	Resistant	Susceptible	Susceptible	Susceptible	Resistant	Resistant	Susceptible	Susceptible	Susceptible													2016-11-10 16:35:19	Equine	Thoroughbred	2	Years	Female	Sensitivity	Lung	Bacterium	Strep. equi ss zooepidemicus	104	TB	1	0	0	0	0	0
Resistant	Susceptible	Susceptible	Susceptible	Susceptible	Susceptible	Intermediate	No Interpretation	Resistant	Resistant	Intermediate	Resistant	Susceptible	Susceptible	Susceptible	Susceptible	Resistant	Susceptible	Susceptible	Resistant													2016-11-12 10:15:39	Equine	Rocky Mountain Horse	9	Years	Female	Sensitivity	Nasal	Bacterium	Strep. equi ss zooepidemicus	468	RMH	1	0	0	0	0	0
Resistant	Susceptible	Intermediate	Susceptible	Susceptible	No Interpretation	Resistant	Resistant	Resistant	Resistant	Resistant	Resistant	Resistant	Resistant	Resistant	Resistant	Resistant	Susceptible	Susceptible	Resistant													2015-12-02 12:01:14	Equine	Belgian	NULL	NULL	Female	Sensitivity	Lung	Bacterium	Strep. equi ss zooepidemicus		Draft	1	0	1	0	0
Susceptible	Susceptible	Susceptible	Susceptible	Susceptible	Susceptible	Susceptible	No Interpretation	Susceptible	Resistant	Susceptible	Susceptible	Susceptible	Susceptible	Susceptible	Susceptible	Susceptible	Susceptible	Susceptible	Susceptible													2012-11-09 09:42:00	Equine	Thoroughbred	13	Years	Female	Sensitivity	Pleura	Bacterium	Strep. equi ss zooepidemicus	676	TB	0	0	0	0	0	0
Intermediate	Susceptible	Susceptible	Susceptible	Susceptible	Susceptible	Susceptible	No Interpretation	Susceptible	Resistant	Susceptible	Resistant	Susceptible	Susceptible	Susceptible	Susceptible	Intermediate	Susceptible	Susceptible	Susceptible													2012-02-02 09:53:25	Equine	Thoroughbred	NULL	NULL	Female	Sensitivity	Lung	Bacterium	Strep. equi ss zooepidemicus		TB	1	0	0	0	0	0
Resistant	Susceptible	Susceptible	Susceptible	Susceptible	Susceptible	Intermediate	No Interpretation	Susceptible	Susceptible	Susceptible	Resistant	Susceptible	Susceptible	Susceptible	Susceptible	Susceptible	Susceptible	Susceptible	Susceptible													2016-11-25 09:02:58	Equine	Standardbred	NULL	NULL	Female	Sensitivity	Lung	Bacterium	Strep. equi ss zooepidemicus		STB	1	0	0	0	0	0
Resistant	Susceptible	Susceptible	Susceptible	Susceptible	Susceptible	Resistant	No Interpretation	Resistant	Resistant	Susceptible	Resistant	Susceptible	Susceptible	Susceptible	Susceptible	Resistant	Susceptible	Susceptible	Susceptible													2015-02-08 13:59:42	Equine	Thoroughbred	1	Years	Female	Sensitivity	Lung	Bacterium	Strep. equi ss zooepidemicus	52	TB	1	0	0	0	0	0
Resistant	Susceptible	Susceptible	Susceptible	Susceptible	Susceptible	Resistant	No Interpretation	Susceptible	Resistant	Susceptible	Resistant	Susceptible	Susceptible	Susceptible	Susceptible	Resistant	Susceptible	Susceptible	Resistant													2015-12-11 16:03:15	Equine	Miniature Horse, American	15	Years	Female	Sensitivity	Nasal	Bacterium	Strep. equi ss zooepidemicus	780	Pony	1	0	0	0	0	0
Resistant	Susceptible	Susceptible	Susceptible	Susceptible	Susceptible	Intermediate	No Interpretation	Susceptible	Resistant	Susceptible	Resistant	Susceptible	Susceptible	Susceptible	Susceptible	Resistant	Susceptible	Susceptible	Susceptible													2016-11-29 10:55:48	Equine	Thoroughbred	NULL	NULL	Male	Sensitivity	Lung	Bacterium	Strep. equi ss zooepidemicus		TB	1	0	0	0	0	0
Resistant	Susceptible	Susceptible	Susceptible	Susceptible	Susceptible	Resistant	Resistant	Susceptible	Resistant	Susceptible	Resistant	Susceptible	Susceptible	Susceptible	Susceptible	Resistant	Susceptible	Susceptible	Susceptible													2016-11-29 13:53:27	Equine	Thoroughbred	NULL	NULL	Female	Sensitivity	Lung	Bacterium	Strep. equi ss zooepidemicus		TB	1	0	0	0	0	0
Resistant	Not Susceptible	Susceptible	Intermediate	No Interpretation	Susceptible	Susceptible	No Interpretation	No Interpretation	No Interpretation	Susceptible	Resistant	Susceptible	No Interpretation	Susceptible	No Interpretation	Resistant	No Interpretation	No Interpretation	No Interpretation													2017-11-06 13:42:42	Equine	Thoroughbred	6	Months	Male	Sensitivity	Lung	Bacterium	Strep. equi ss zooepidemicus	24	TB	1	1	0	1		0
Resistant	Susceptible	Susceptible	Susceptible	Susceptible	Susceptible	Susceptible	No Interpretation	Resistant	Resistant	Susceptible	Resistant	Susceptible	Susceptible	Intermediate	Susceptible	Resistant	Susceptible	Susceptible	Susceptible													2015-12-19 15:11:52	Equine	Thoroughbred	7	Years	Female	Sensitivity	Lung	Bacterium	Strep. equi ss zooepidemicus	364	TB	1	0	0	0	0	0
Resistant	Susceptible	Susceptible	Susceptible	Susceptible	Susceptible	Susceptible	No Interpretation	Resistant	Resistant	Susceptible	Resistant	Susceptible	Susceptible	Resistant	Susceptible	Resistant	Susceptible	Susceptible	Susceptible													2015-12-19 16:05:15	Equine	Thoroughbred	9	Years	Female	Sensitivity	Lung	Bacterium	Strep. equi ss zooepidemicus	468	TB	1	0	0	0	0	0
Resistant	Susceptible	Susceptible	Susceptible	Susceptible	No Interpretation	Intermediate	No Interpretation	Susceptible	Intermediate	Susceptible	Resistant	Susceptible	Susceptible	Susceptible	Susceptible	Resistant	Susceptible	Susceptible	Susceptible													2015-12-20 00:58:11	Equine	Thoroughbred	NULL	NULL	NULL	Sensitivity	Lung	Bacterium	Strep. equi ss zooepidemicus		TB	1	0	0	0	0
Resistant	Intermediate	Susceptible	Resistant	Susceptible	Susceptible	Intermediate	No Interpretation	Susceptible	Intermediate	Susceptible	Resistant	Susceptible	Susceptible	Susceptible	Susceptible	Resistant	Susceptible	Susceptible	Resistant													2017-02-04 11:06:14	Equine	Thoroughbred	NULL	NULL	Male	Sensitivity	Lung	Bacterium	Strep. equi ss zooepidemicus		TB	1	1	0	1	0	0
Intermediate	Susceptible	Susceptible	Susceptible	Susceptible	Susceptible	Susceptible	No Interpretation	Susceptible	Resistant	Susceptible	Susceptible	Susceptible	Susceptible	Susceptible	Susceptible	Intermediate	Susceptible	Susceptible	Susceptible													2013-12-26 09:28:15	Equine	Thoroughbred	NULL	NULL	NULL	Sensitivity	Lung	Bacterium	Strep. equi ss zooepidemicus		TB	1	0	0	0	0	0
Resistant	Susceptible	Susceptible	Susceptible	Susceptible	Susceptible	Intermediate	No Interpretation	Susceptible	Resistant	Susceptible	Resistant	Susceptible	Susceptible	Susceptible	Susceptible	Resistant	Susceptible	Susceptible	Resistant													2016-12-09 08:10:20	Equine	Thoroughbred	NULL	NULL	NULL	Sensitivity	Lung	Bacterium	Strep. equi ss zooepidemicus		TB	1	0	0	0	0	0
Resistant	Susceptible	Susceptible	Susceptible	Susceptible	Susceptible	Intermediate	No Interpretation	Susceptible	Resistant	Susceptible	Resistant	Susceptible	Susceptible	Susceptible	Susceptible	Resistant	Susceptible	Resistant	Resistant													2016-12-09 10:30:40	Equine	Thoroughbred	NULL	NULL	NULL	Sensitivity	Lung	Bacterium	Strep. equi ss zooepidemicus		TB	1	0	0	0	0	0
Resistant	Susceptible	Susceptible	Susceptible	Susceptible	Susceptible	Intermediate	No Interpretation	Susceptible	Resistant	Susceptible	Resistant	Susceptible	Susceptible	Susceptible	Susceptible	Resistant	Susceptible	Susceptible	Resistant													2015-12-30 11:04:18	Equine	Morgan	5	Years	Female	Sensitivity	Lung	Bacterium	Strep. equi ss zooepidemicus	260	Other	1	0	0	0	0	0
Resistant	Susceptible	Susceptible	Intermediate	No Interpretation	Susceptible	Susceptible	No Interpretation	No Interpretation	No Interpretation	Susceptible	Resistant	Susceptible	No Interpretation	Susceptible	No Interpretation	Intermediate	No Interpretation	No Interpretation	No Interpretation													2017-11-11 10:53:22	Equine	NULL	NULL	NULL	Female	Sensitivity	Nasal	Bacterium	Strep. equi ss zooepidemicus			1	0	0	1		0
Intermediate	Susceptible	Susceptible	Susceptible	Susceptible	Susceptible	Susceptible	No Interpretation	Susceptible	Resistant	Susceptible	Susceptible	Susceptible	Susceptible	Susceptible	Susceptible	Intermediate	Susceptible	Susceptible	Susceptible													2012-12-07 11:37:16	Equine	NULL	NULL	NULL	NULL	Sensitivity	Lung	Bacterium	Strep. equi ss zooepidemicus			1	0	0	0	0	0
Intermediate	Susceptible	Susceptible	Susceptible	Susceptible	Susceptible	Susceptible	No Interpretation	Susceptible	Resistant	Susceptible	Susceptible	Susceptible	Susceptible	Susceptible	Susceptible	Intermediate	Susceptible	Susceptible	Susceptible													2012-12-08 10:13:00	Equine	Quarter Horse, American	NULL	NULL	NULL	Sensitivity	Nasal	Bacterium	Strep. equi ss zooepidemicus		QH	1	0	0	0	0	0
Intermediate	Intermediate	Susceptible	Resistant	Resistant	No Interpretation	Resistant	Resistant	Resistant	Resistant	Resistant	Resistant	Resistant	Susceptible	Susceptible	Resistant	Resistant	Susceptible	Resistant	Resistant													2017-02-05 13:21:18	Equine	Thoroughbred	22	Years	Female	Sensitivity	Lung	Bacterium	Strep. equi ss zooepidemicus	1144	TB	1	1	0	1	1
Resistant	Susceptible	Susceptible	Susceptible	Susceptible	Susceptible	Intermediate	No Interpretation	Susceptible	Resistant	Susceptible	Resistant	Susceptible	Susceptible	Susceptible	Susceptible	Resistant	Susceptible	Susceptible	Resistant													2016-12-17 15:25:48	Equine	Thoroughbred	NULL	NULL	NULL	Sensitivity	Lung	Bacterium	Strep. equi ss zooepidemicus		TB	1	0	0	0	0	0
Resistant	Susceptible	Susceptible	Susceptible	Susceptible	Susceptible	Resistant	No Interpretation	Intermediate	Resistant	Susceptible	Resistant	Susceptible	Susceptible	Susceptible	Susceptible	Resistant	Susceptible	Susceptible	Resistant													2016-12-18 15:24:14	Equine	Tennessee Walking Horse	2	Years	Female	Sensitivity	Lung	Bacterium	Strep. equi ss zooepidemicus	104	TWH	1	0	0	0	0	0
Resistant	Susceptible	Susceptible	Susceptible	Susceptible	Susceptible	Susceptible	No Interpretation	Resistant	Susceptible	Susceptible	Susceptible	Susceptible	Resistant	Susceptible	Intermediate	Resistant	Susceptible	Susceptible	Resistant													2016-12-20 12:00:48	Equine	Arabian	NULL	NULL	Female	Sensitivity	Lung	Bacterium	Strep. equi ss zooepidemicus		Arabi	1	0	0	0	0	0
Intermediate	Susceptible	Susceptible	Susceptible	Susceptible	Susceptible	Susceptible	No Interpretation	Susceptible	Resistant	Susceptible	Susceptible	Susceptible	Susceptible	Susceptible	Susceptible	Intermediate	Susceptible	Susceptible	Susceptible													2012-12-13 12:51:00	Equine	Thoroughbred	NULL	NULL	Female	Sensitivity	Lung	Bacterium	Strep. equi ss zooepidemicus		TB	1	0	0	0	0	0
Susceptible	Susceptible	Susceptible	Susceptible	Susceptible	Susceptible	Susceptible	No Interpretation	Susceptible	Intermediate	Susceptible	Susceptible	Susceptible	Susceptible	Susceptible	Susceptible	Susceptible	Susceptible	Susceptible	Susceptible													2012-02-05 15:19:26	Equine	Thoroughbred	NULL	NULL	Female	Sensitivity	Lung	Bacterium	Strep. equi ss zooepidemicus		TB	0	0	0	0	0	0
Intermediate	Susceptible	Susceptible	Susceptible	Susceptible	Susceptible	Intermediate	No Interpretation	Susceptible	Resistant	Susceptible	Susceptible	Susceptible	Susceptible	Susceptible	Susceptible	Intermediate	Susceptible	Susceptible	Susceptible													2012-02-05 15:20:49	Equine	Quarter Horse, American	1	Months	Female	Sensitivity	Pleura	Bacterium	Strep. equi ss zooepidemicus	4	QH	1	0	0	0	0	0
Intermediate	Susceptible	Susceptible	Susceptible	Susceptible	Susceptible	Susceptible	No Interpretation	Susceptible	Resistant	Susceptible	Intermediate	Susceptible	Susceptible	Susceptible	Susceptible	Intermediate	Susceptible	Susceptible	Susceptible													2012-12-17 08:33:31	Equine	Thoroughbred	2	Years	Male	Sensitivity	Lung	Bacterium	Strep. equi ss zooepidemicus	104	TB	1	0	0	0	0	0
Resistant	Susceptible	Susceptible	Susceptible	Susceptible	Susceptible	Susceptible	No Interpretation	Susceptible	Resistant	Susceptible	Intermediate	Susceptible	Susceptible	Susceptible	Susceptible	Intermediate	Susceptible	Susceptible	Susceptible													2012-12-17 12:59:20	Equine	Thoroughbred	NULL	NULL	NULL	Sensitivity	Lung	Bacterium	Strep. equi ss zooepidemicus		TB	1	0	0	0	0	0
Resistant	Susceptible	Susceptible	Susceptible	Susceptible	Susceptible	Intermediate	No Interpretation	Susceptible	Resistant	Susceptible	Resistant	Susceptible	Susceptible	Susceptible	Susceptible	Resistant	Susceptible	Susceptible	Resistant													2017-02-08 11:34:23	Equine	Thoroughbred	NULL	NULL	Male	Sensitivity	Lung	Bacterium	Strep. equi ss zooepidemicus		TB	1	0	0	0	0	0
Resistant	Susceptible	Susceptible	Intermediate	No Interpretation	Susceptible	Susceptible	No Interpretation	No Interpretation	No Interpretation	Susceptible	Resistant	Susceptible	No Interpretation	Susceptible	No Interpretation	Resistant	No Interpretation	No Interpretation	No Interpretation													2017-12-12 10:26:45	Equine	Thoroughbred	NULL	NULL	Male	Sensitivity	Lung	Bacterium	Strep. equi ss zooepidemicus		TB	1	0	0	1		0
Resistant	Susceptible	Susceptible	Intermediate	No Interpretation	Susceptible	Susceptible	No Interpretation	No Interpretation	No Interpretation	Susceptible	Resistant	Susceptible	No Interpretation	Susceptible	No Interpretation	Intermediate	No Interpretation	No Interpretation	No Interpretation													2017-12-15 07:26:16	Equine	Saddlebred, American	NULL	NULL	NULL	Sensitivity	Nasal	Bacterium	Strep. equi ss zooepidemicus		Saddl	1	0	0	1		0
Intermediate	Susceptible	Susceptible	Susceptible	Susceptible	Susceptible	Resistant	No Interpretation	Resistant	Resistant	Susceptible	Resistant	Susceptible	Susceptible	Susceptible	Susceptible	Resistant	Susceptible	Susceptible	Resistant													2015-02-17 10:38:07	Equine	Thoroughbred	1	Years	Male	Sensitivity	Lung	Bacterium	Strep. equi ss zooepidemicus	52	TB	1	0	0	0	0	0
Resistant	Susceptible	Susceptible	Intermediate	No Interpretation	Susceptible	Susceptible	No Interpretation	No Interpretation	No Interpretation	Susceptible	Resistant	Susceptible	No Interpretation	Susceptible	No Interpretation	Intermediate	No Interpretation	No Interpretation	No Interpretation													2017-12-20 10:58:00	Equine	Thoroughbred	NULL	NULL	NULL	Sensitivity	Nasal	Bacterium	Strep. equi ss zooepidemicus		TB	1	0	0	1		0
Resistant	Susceptible	Susceptible	Intermediate	No Interpretation	Susceptible	Susceptible	No Interpretation	No Interpretation	No Interpretation	Susceptible	Intermediate	Susceptible	No Interpretation	Susceptible	No Interpretation	Resistant	No Interpretation	No Interpretation	No Interpretation													2017-12-20 10:58:00	Equine	Thoroughbred	NULL	NULL	NULL	Sensitivity	Nasal	Bacterium	Strep. equi ss zooepidemicus		TB	1	0	0	1		0
Resistant	Susceptible	Susceptible	Intermediate	No Interpretation	Susceptible	Susceptible	No Interpretation	No Interpretation	No Interpretation	Susceptible	Resistant	Susceptible	No Interpretation	Susceptible	No Interpretation	Intermediate	No Interpretation	No Interpretation	No Interpretation													2017-12-20 10:58:00	Equine	Thoroughbred	NULL	NULL	NULL	Sensitivity	Nasal	Bacterium	Strep. equi ss zooepidemicus		TB	1	0	0	1		0
Resistant	Susceptible	Susceptible	Intermediate	No Interpretation	Susceptible	Susceptible	No Interpretation	No Interpretation	No Interpretation	Susceptible	Resistant	Susceptible	No Interpretation	Susceptible	No Interpretation	Intermediate	No Interpretation	No Interpretation	No Interpretation													2017-12-20 10:58:00	Equine	Thoroughbred	NULL	NULL	NULL	Sensitivity	Nasal	Bacterium	Strep. equi ss zooepidemicus		TB	1	0	0	1		0
Resistant	Susceptible	Susceptible	Susceptible	Susceptible	Susceptible	Susceptible	No Interpretation	Susceptible	Intermediate	Susceptible	Susceptible	Susceptible	Susceptible	Susceptible	Susceptible	Susceptible	Susceptible	Susceptible	Susceptible													2013-02-10 14:04:08	Equine	Thoroughbred	NULL	NULL	NULL	Sensitivity	Lung	Bacterium	Strep. equi ss zooepidemicus		TB	1	0	0	0	0	0
Intermediate	Susceptible	Susceptible	Susceptible	Susceptible	Susceptible	Susceptible	No Interpretation	Susceptible	Resistant	Susceptible	Intermediate	Susceptible	Susceptible	Susceptible	Susceptible	Intermediate	Susceptible	Susceptible	Susceptible													2012-02-10 10:01:07	Equine	Saddlebred, American	4	Years	Female	Sensitivity	Transtrachea	Bacterium	Strep. equi ss zooepidemicus	208	Saddl	1	0	0	0	0	0
Intermediate	Susceptible	Susceptible	Susceptible	Susceptible	Susceptible	Susceptible	No Interpretation	Resistant	Resistant	Susceptible	Intermediate	Susceptible	Susceptible	Susceptible	Susceptible	Resistant	Susceptible	Susceptible	Susceptible													2015-02-22 14:33:55	Equine	Warm Blood	16	Years	Female	Sensitivity	Lung	Bacterium	Strep. equi ss zooepidemicus	832	WB	1	0	0	0	0	0
Resistant	Susceptible	Susceptible	Susceptible	Susceptible	No Interpretation	Resistant	No Interpretation	Resistant	Resistant	Susceptible	Resistant	Susceptible	Susceptible	Intermediate	Susceptible	Resistant	Susceptible	Susceptible	Susceptible													2016-02-16 10:26:00	Equine	Quarter Horse, American	NULL	NULL	Female	Sensitivity	Pharyngeal	Bacterium	Strep. equi ss zooepidemicus		QH	1	0	0	0	0
Resistant	Susceptible	Susceptible	Susceptible	Susceptible	Susceptible	Susceptible	No Interpretation	Susceptible	Susceptible	Susceptible	Resistant	Susceptible	Susceptible	Susceptible	Susceptible	Resistant	Susceptible	Susceptible	Resistant													2017-02-16 07:40:29	Equine	NULL	NULL	NULL	Neutered	Sensitivity	Nasal	Bacterium	Strep. equi ss zooepidemicus			1	0	0	0	0	0
Resistant	Susceptible	Susceptible	Susceptible	Susceptible	No Interpretation	Resistant	No Interpretation	Susceptible	Intermediate	Susceptible	Resistant	Susceptible	Susceptible	Susceptible	Susceptible	Resistant	Susceptible	Susceptible	Susceptible													2017-02-16 09:48:07	Equine	Thoroughbred	NULL	NULL	NULL	Sensitivity	Lung	Bacterium	Strep. equi ss zooepidemicus		TB	1	0	0	0	0
Resistant	Susceptible	Susceptible	Susceptible	Susceptible	Susceptible	Susceptible	No Interpretation	Susceptible	Resistant	Susceptible	Intermediate	Susceptible	Susceptible	Susceptible	Susceptible	Intermediate	Susceptible	Susceptible	Susceptible													2014-01-07 16:50:35	Equine	Grade	14	Years	Female	Sensitivity	Lung	Bacterium	Strep. equi ss zooepidemicus	728	Mixed	1	0	0	0	0	0
Resistant	Susceptible	Susceptible	Susceptible	Susceptible	Susceptible	Susceptible	No Interpretation	Susceptible	Intermediate	Susceptible	Intermediate	Susceptible	Susceptible	Susceptible	Susceptible	Intermediate	Susceptible	Susceptible	Resistant													2012-01-06 10:07:00	Equine	NULL	NULL	NULL	NULL	Sensitivity	Lung	Bacterium	Strep. equi ss zooepidemicus			1	0	0	0	0	0
Intermediate	Susceptible	Susceptible	Susceptible	Susceptible	Susceptible	Susceptible	No Interpretation	Susceptible	Intermediate	Susceptible	Intermediate	Susceptible	Susceptible	Susceptible	Susceptible	Intermediate	Susceptible	Susceptible	Susceptible													2014-03-04 08:42:48	Equine	Thoroughbred	NULL	NULL	NULL	Sensitivity	Lung	Bacterium	Strep. equi ss zooepidemicus		TB	1	0	0	0	0	0
Intermediate	Susceptible	Susceptible	Susceptible	Susceptible	Susceptible	Resistant	No Interpretation	Susceptible	Resistant	Susceptible	Resistant	Susceptible	Susceptible	Susceptible	Susceptible	Resistant	Susceptible	Susceptible	Resistant													2015-03-12 09:00:44	Equine	Warm Blood	8	Months	Male	Sensitivity	Lung	Bacterium	Strep. equi ss zooepidemicus	32	WB	1	0	0	0	0	0
Intermediate	Susceptible	Susceptible	Susceptible	Susceptible	Susceptible	Susceptible	No Interpretation	Resistant	Resistant	Susceptible	Intermediate	Susceptible	Susceptible	Susceptible	Susceptible	Resistant	Susceptible	Susceptible	Susceptible													2015-03-11 15:40:26	Equine	Thoroughbred	1	Years	Female	Sensitivity	Lung	Bacterium	Strep. equi ss zooepidemicus	52	TB	1	0	0	0	0	0
Resistant	Susceptible	Susceptible	Susceptible	Susceptible	Susceptible	Susceptible	No Interpretation	Susceptible	Intermediate	Susceptible	Resistant	Susceptible	Susceptible	Susceptible	Susceptible	Resistant	Susceptible	Susceptible	Resistant													2013-02-27 13:20:10	Equine	Thoroughbred	1	Days	Male	Sensitivity	Lung	Bacterium	Strep. equi ss zooepidemicus	0.142857	TB	1	0	0	0	0	0
Resistant	Susceptible	Susceptible	Susceptible	Susceptible	Susceptible	Susceptible	Resistant	Susceptible	Intermediate	Susceptible	Resistant	Susceptible	Susceptible	Susceptible	Susceptible	Susceptible	Susceptible	Susceptible	Resistant													2016-02-28 14:00:09	Equine	Tennessee Walking Horse	10	Months	Male	Sensitivity	Lung	Bacterium	Strep. equi ss zooepidemicus	40	TWH	1	0	0	0	0	0
Intermediate	Susceptible	Susceptible	Susceptible	Susceptible	Susceptible	Intermediate	No Interpretation	Susceptible	Resistant	Susceptible	Resistant	Susceptible	Susceptible	Susceptible	Susceptible	Resistant	Susceptible	Susceptible	Resistant													2015-03-12 13:38:15	Equine	Thoroughbred	NULL	NULL	Male	Sensitivity	Lung	Bacterium	Strep. equi ss zooepidemicus		TB	1	0	0	0	0	0
Intermediate	Intermediate	Susceptible	Susceptible	Susceptible	Susceptible	Susceptible	No Interpretation	Intermediate	Resistant	Susceptible	Susceptible	Susceptible	Susceptible	Susceptible	Susceptible	Resistant	Susceptible	Susceptible	Resistant													2013-02-28 11:01:00	Equine	Thoroughbred	NULL	NULL	NULL	Sensitivity	Lung	Bacterium	Strep. equi ss zooepidemicus		TB	1	1	0	0	0	0
Susceptible	Susceptible	Susceptible	Susceptible	Susceptible	Susceptible	Intermediate	No Interpretation	Susceptible	Resistant	Susceptible	Intermediate	Susceptible	Susceptible	Susceptible	Susceptible	Intermediate	Susceptible	Susceptible	Susceptible													2015-03-17 09:16:07	Equine	Thoroughbred	7	Days	Male	Sensitivity	Lung	Bacterium	Strep. equi ss zooepidemicus	1	TB	0	0	0	0	0	0
Intermediate	Susceptible	Susceptible	Susceptible	Susceptible	Susceptible	Intermediate	No Interpretation	Susceptible	Resistant	Susceptible	Susceptible	Susceptible	Susceptible	Susceptible	Susceptible	Susceptible	Susceptible	Susceptible	Susceptible													2012-03-05 11:57:25	Equine	Thoroughbred	5	Hours	Male	Sensitivity	Lung	Bacterium	Strep. equi ss zooepidemicus	0.0297619	TB	1	0	0	0	0	0
Resistant	Susceptible	Susceptible	Susceptible	Susceptible	Susceptible	Susceptible	No Interpretation	Susceptible	Intermediate	Susceptible	Susceptible	Susceptible	Susceptible	Susceptible	Susceptible	Intermediate	Susceptible	Susceptible	Susceptible													2013-03-05 09:44:53	Equine	Thoroughbred	4	Years	Neutered	Sensitivity	Lung	Bacterium	Strep. equi ss zooepidemicus	208	TB	1	0	0	0	0	0
Intermediate	Susceptible	Susceptible	Susceptible	Susceptible	Susceptible	Susceptible	No Interpretation	Susceptible	Intermediate	Susceptible	Susceptible	Susceptible	Susceptible	Susceptible	Susceptible	Intermediate	Susceptible	Susceptible	Susceptible													2013-01-07 15:23:00	Equine	Thoroughbred	3	Hours	NULL	Sensitivity	Lung	Bacterium	Strep. equi ss zooepidemicus	0.0178571	TB	1	0	0	0	0	0
Intermediate	Susceptible	Susceptible	Susceptible	Susceptible	Susceptible	Susceptible	No Interpretation	Intermediate	Resistant	Susceptible	Susceptible	Susceptible	Susceptible	Susceptible	Susceptible	Resistant	Susceptible	Susceptible	Susceptible													2013-03-06 13:36:00	Equine	NULL	4	Years	Neutered	Sensitivity	Nasal	Bacterium	Strep. equi ss zooepidemicus	208		1	0	0	0	0	0
Resistant	Resistant	Susceptible	Susceptible	Susceptible	No Interpretation	Intermediate	No Interpretation	Resistant	Resistant	Resistant	Resistant	Intermediate	Susceptible	Resistant	Resistant	Resistant	Susceptible	Resistant	Resistant													2016-03-08 16:37:34	Equine	Thoroughbred	42	Days	NULL	Sensitivity	Nasal	Bacterium	Strep. equi ss zooepidemicus	6	TB	1	1	0	0	0
Resistant	Susceptible	Susceptible	Susceptible	Susceptible	Susceptible	Susceptible	No Interpretation	Susceptible	Resistant	Susceptible	Intermediate	Susceptible	Susceptible	Susceptible	Susceptible	Susceptible	Susceptible	Susceptible	Susceptible													2015-03-22 02:31:37	Equine	Thoroughbred	36	Hours	Male	Sensitivity	Lung	Bacterium	Strep. equi ss zooepidemicus	0.214286	TB	1	0	0	0	0	0
Intermediate	Susceptible	Susceptible	Susceptible	Susceptible	Susceptible	Susceptible	No Interpretation	Susceptible	Resistant	Susceptible	Intermediate	Susceptible	Susceptible	Susceptible	Susceptible	Susceptible	Susceptible	Susceptible	Susceptible													2014-03-19 10:03:37	Equine	Thoroughbred	NULL	NULL	NULL	Sensitivity	Lung	Bacterium	Strep. equi ss zooepidemicus		TB	1	0	0	0	0	0
Resistant	Susceptible	Susceptible	Susceptible	Susceptible	No Interpretation	Susceptible	No Interpretation	Susceptible	Resistant	Susceptible	Resistant	Susceptible	Susceptible	Susceptible	Susceptible	Susceptible	Susceptible	Susceptible	Susceptible													2016-03-14 15:57:54	Equine	Thoroughbred	3	Weeks	Male	Sensitivity	Lung	Bacterium	Strep. equi ss zooepidemicus	3	TB	1	0	0	0	0
Resistant	Susceptible	Susceptible	Susceptible	Susceptible	Susceptible	Intermediate	No Interpretation	Susceptible	Resistant	Susceptible	Resistant	Susceptible	Susceptible	Susceptible	Susceptible	Susceptible	Susceptible	Susceptible	Susceptible													2015-03-29 15:39:15	Equine	Quarter Horse, American	11	Months	Male	Sensitivity	Lung	Bacterium	Strep. equi ss zooepidemicus	44	QH	1	0	0	0	0	0
Resistant	Susceptible	Susceptible	Susceptible	Susceptible	Susceptible	Intermediate	No Interpretation	Susceptible	Resistant	Susceptible	Resistant	Susceptible	Susceptible	Susceptible	Susceptible	Resistant	Susceptible	Susceptible	Susceptible													2016-03-15 14:24:59	Equine	Thoroughbred	10	Years	Female	Sensitivity	Lung	Bacterium	Strep. equi ss zooepidemicus	520	TB	1	0	0	0	0	0
Intermediate	Susceptible	Susceptible	Susceptible	Susceptible	Susceptible	Susceptible	No Interpretation	Susceptible	Resistant	Susceptible	Intermediate	Susceptible	Susceptible	Susceptible	Susceptible	Intermediate	Susceptible	Susceptible	Susceptible													2015-03-30 10:42:28	Equine	Thoroughbred	NULL	NULL	NULL	Sensitivity	Lung	Bacterium	Strep. equi ss zooepidemicus		TB	1	0	0	0	0	0
Resistant	Susceptible	Susceptible	Susceptible	Susceptible	No Interpretation	Resistant	No Interpretation	Susceptible	Resistant	Susceptible	Susceptible	Susceptible	Susceptible	Susceptible	Susceptible	Resistant	Susceptible	Susceptible	Resistant													2017-03-18 10:16:14	Equine	Thoroughbred	5	Days	Male	Sensitivity	Lung	Bacterium	Strep. equi ss zooepidemicus	0.714286	TB	1	0	0	0	0
Resistant	Susceptible	Susceptible	Susceptible	Susceptible	Susceptible	Resistant	No Interpretation	Resistant	Resistant	Susceptible	Resistant	Susceptible	Susceptible	Susceptible	Susceptible	Resistant	Susceptible	Susceptible	Resistant													2017-03-21 10:27:05	Equine	NULL	NULL	NULL	NULL	Sensitivity	Lung	Bacterium	Strep. equi ss zooepidemicus			1	0	0	0	0	0
Susceptible	Susceptible	Susceptible	Susceptible	Susceptible	Susceptible	Susceptible	No Interpretation	Susceptible	Resistant	Susceptible	Susceptible	Susceptible	Susceptible	Susceptible	Susceptible	Susceptible	Susceptible	Susceptible	Susceptible													2013-03-16 12:51:00	Equine	Thoroughbred	24	Hours	Female	Sensitivity	Lung	Bacterium	Strep. equi ss zooepidemicus	0.142857	TB	0	0	0	0	0	0
Resistant	Susceptible	Susceptible	Susceptible	Susceptible	Susceptible	Intermediate	No Interpretation	Susceptible	Intermediate	Susceptible	Resistant	Susceptible	Susceptible	Susceptible	Susceptible	Resistant	Susceptible	Susceptible	Resistant													2016-03-21 09:01:16	Equine	Thoroughbred	5	Days	Male	Sensitivity	Lung	Bacterium	Strep. equi ss zooepidemicus	0.714286	TB	1	0	0	0	0	0
Resistant	Susceptible	Susceptible	Susceptible	Susceptible	Susceptible	Intermediate	No Interpretation	Resistant	Resistant	Susceptible	Resistant	Susceptible	Susceptible	Susceptible	Resistant	Resistant	Susceptible	Susceptible	Susceptible													2014-03-29 10:02:36	Equine	Thoroughbred	2	Years	Female	Sensitivity	Lung	Bacterium	Strep. equi ss zooepidemicus	104	TB	1	0	0	0	0	0
Intermediate	Susceptible	Susceptible	Susceptible	Susceptible	Susceptible	Intermediate	Resistant	Intermediate	Resistant	Resistant	Resistant	Susceptible	Susceptible	Intermediate	Intermediate	Resistant	Susceptible	Susceptible	Susceptible													2015-04-06 09:40:25	Equine	Thoroughbred	NULL	NULL	Male	Sensitivity	Lung	Bacterium	Strep. equi ss zooepidemicus		TB	1	0	0	0	0	0
Susceptible	Susceptible	Susceptible	Susceptible	Susceptible	Susceptible	Susceptible	No Interpretation	Susceptible	Resistant	Susceptible	Susceptible	Susceptible	Susceptible	Susceptible	Susceptible	Intermediate	Susceptible	Susceptible	Susceptible													2014-04-01 13:15:32	Equine	Thoroughbred	NULL	NULL	NULL	Sensitivity	Lung	Bacterium	Strep. equi ss zooepidemicus		TB	0	0	0	0	0	0
Intermediate	Intermediate	Susceptible	Susceptible	Susceptible	Susceptible	Susceptible	Resistant	Susceptible	Resistant	Susceptible	Intermediate	Susceptible	Susceptible	Susceptible	Susceptible	Resistant	Susceptible	Susceptible	Resistant													2015-04-07 15:31:00	Equine	Thoroughbred	1	Years	Male	Sensitivity	Lung	Bacterium	Strep. equi ss zooepidemicus	52	TB	1	1	0	0	0	0
Resistant	Resistant	Susceptible	Susceptible	Susceptible	Susceptible	Susceptible	No Interpretation	Susceptible	Intermediate	Resistant	Resistant	Susceptible	Susceptible	Resistant	Susceptible	Resistant	Resistant	Resistant	Susceptible													2017-03-29 08:32:05	Equine	Thoroughbred	10	Days	Male	Sensitivity	Lung	Bacterium	Strep. equi ss zooepidemicus	1.42857	TB	1	1	0	0	0	0
Intermediate	Susceptible	Susceptible	Susceptible	Susceptible	Susceptible	Susceptible	No Interpretation	Susceptible	Resistant	Susceptible	Intermediate	Susceptible	Susceptible	Susceptible	Susceptible	Intermediate	Susceptible	Susceptible	Susceptible													2014-04-03 09:20:27	Equine	Thoroughbred	NULL	NULL	Female	Sensitivity	Lung	Bacterium	Strep. equi ss zooepidemicus		TB	1	0	0	0	0	0
Susceptible	Susceptible	Susceptible	Susceptible	Susceptible	Susceptible	Susceptible	No Interpretation	Susceptible	Resistant	Susceptible	Susceptible	Susceptible	Susceptible	Susceptible	Susceptible	Intermediate	Susceptible	Susceptible	Susceptible													2013-03-22 11:24:00	Equine	Quarter Horse, American	3	Days	NULL	Sensitivity	Lung	Bacterium	Strep. equi ss zooepidemicus	0.428571	QH	0	0	0	0	0	0
Resistant	Susceptible	Susceptible	Susceptible	Susceptible	Susceptible	Susceptible	No Interpretation	Susceptible	Resistant	Susceptible	Intermediate	Susceptible	Susceptible	Susceptible	Susceptible	Resistant	Susceptible	Susceptible	Resistant													2015-04-14 09:25:27	Equine	Thoroughbred	3	Years	Neutered	Sensitivity	Lung	Bacterium	Strep. equi ss zooepidemicus	156	TB	1	0	0	0	0	0
Resistant	Susceptible	Susceptible	Susceptible	Susceptible	Susceptible	Intermediate	No Interpretation	Susceptible	Resistant	Susceptible	Resistant	Susceptible	Susceptible	Susceptible	Susceptible	Resistant	Susceptible	Susceptible	Resistant													2017-04-02 13:16:00	Equine	Thoroughbred	3	Days	Male	Sensitivity	Lung	Bacterium	Strep. equi ss zooepidemicus	0.428571	TB	1	0	0	0	0	0
Resistant	Susceptible	Susceptible	Susceptible	Susceptible	Susceptible	Susceptible	No Interpretation	Susceptible	Intermediate	Susceptible	Intermediate	Susceptible	Susceptible	Susceptible	Susceptible	Intermediate	Susceptible	Susceptible	Susceptible													2013-03-28 14:07:00	Equine	Thoroughbred	4	Years	Female	Sensitivity	Lung	Bacterium	Strep. equi ss zooepidemicus	208	TB	1	0	0	0	0	0
Resistant	Susceptible	Susceptible	Susceptible	Susceptible	Susceptible	Susceptible	No Interpretation	Intermediate	Resistant	Susceptible	Intermediate	Susceptible	Susceptible	Susceptible	Susceptible	Resistant	Susceptible	Susceptible	Resistant													2015-04-16 14:15:14	Equine	NULL	4	Years	Neutered	Sensitivity	Lung	Bacterium	Strep. equi ss zooepidemicus	208		1	0	0	0	0	0
Resistant	Susceptible	Susceptible	Susceptible	Susceptible	Susceptible	Susceptible	No Interpretation	Resistant	Intermediate	Susceptible	Intermediate	Susceptible	Susceptible	Susceptible	Susceptible	Resistant	Susceptible	Susceptible	Susceptible													2012-03-30 14:09:36	Equine	Thoroughbred	NULL	NULL	NULL	Sensitivity	Lung	Bacterium	Strep. equi ss zooepidemicus		TB	1	0	0	0	0	0
Susceptible	Susceptible	Susceptible	Susceptible	Susceptible	Susceptible	Susceptible	No Interpretation	Susceptible	Resistant	Susceptible	Susceptible	Susceptible	Susceptible	Susceptible	Susceptible	Susceptible	Susceptible	Susceptible	Susceptible													2014-04-11 08:44:48	Equine	Warm Blood	6	Days	Male	Sensitivity	Lung	Bacterium	Strep. equi ss zooepidemicus	0.857143	WB	0	0	0	0	0	0
Resistant	Susceptible	Susceptible	Susceptible	Susceptible	Susceptible	Susceptible	No Interpretation	Susceptible	Resistant	Susceptible	Resistant	Susceptible	Susceptible	Susceptible	Susceptible	Susceptible	Susceptible	Susceptible	Resistant													2016-01-11 12:11:56	Equine	Thoroughbred	NULL	NULL	NULL	Sensitivity	Lung	Bacterium	Strep. equi ss zooepidemicus		TB	1	0	0	0	0	0
Intermediate	Susceptible	Susceptible	Susceptible	Susceptible	Susceptible	Susceptible	No Interpretation	Susceptible	Resistant	Susceptible	Susceptible	Susceptible	Susceptible	Susceptible	Susceptible	Intermediate	Susceptible	Susceptible	Susceptible													2013-03-31 08:44:34	Equine	Tennessee Walking Horse	NULL	NULL	Male	Sensitivity	Lung	Bacterium	Strep. equi ss zooepidemicus		TWH	1	0	0	0	0	0
Resistant	Susceptible	Susceptible	Susceptible	Susceptible	Susceptible	Intermediate	No Interpretation	Resistant	Resistant	Susceptible	Resistant	Susceptible	Resistant	Susceptible	Susceptible	Resistant	Susceptible	Susceptible	Resistant													2015-04-18 09:28:01	Equine	Mixed Breed	2	Years	Neutered	Sensitivity	Nasal	Bacterium	Strep. equi ss zooepidemicus	104	Mixed	1	0	0	0	0	0
Resistant	Susceptible	Susceptible	Susceptible	Susceptible	Susceptible	Intermediate	No Interpretation	Susceptible	Intermediate	Susceptible	Intermediate	Susceptible	Susceptible	Susceptible	Susceptible	Resistant	Susceptible	Susceptible	Susceptible													2016-04-05 09:49:29	Equine	Thoroughbred	NULL	NULL	NULL	Sensitivity	Lung	Bacterium	Strep. equi ss zooepidemicus		TB	1	0	0	0	0	0
Resistant	Susceptible	Susceptible	Susceptible	Susceptible	Susceptible	Susceptible	No Interpretation	Susceptible	Resistant	Susceptible	Intermediate	Susceptible	Susceptible	Susceptible	Susceptible	Intermediate	Susceptible	Susceptible	Susceptible													2014-04-14 16:05:12	Equine	NULL	NULL	NULL	NULL	Sensitivity	Transtrachea	Bacterium	Strep. equi ss zooepidemicus			1	0	0	0	0	0
Resistant	Susceptible	Susceptible	Susceptible	Susceptible	Susceptible	Susceptible	No Interpretation	Resistant	Resistant	Susceptible	Intermediate	Susceptible	Susceptible	Susceptible	Susceptible	Resistant	Susceptible	Susceptible	Resistant													2014-04-14 16:05:12	Equine	NULL	NULL	NULL	NULL	Sensitivity	Transtrachea	Bacterium	Strep. equi ss zooepidemicus			1	0	0	0	0	0
Resistant	Susceptible	Resistant	Susceptible	Susceptible	No Interpretation	Intermediate	Resistant	Susceptible	Resistant	Resistant	Resistant	Susceptible	Susceptible	Susceptible	Susceptible	Resistant	Susceptible	Susceptible	Resistant													2017-04-08 09:01:17	Equine	Standardbred	NULL	NULL	Female	Sensitivity	Lung	Bacterium	Strep. equi ss zooepidemicus		STB	1	0	1	0	0
Intermediate	Susceptible	Susceptible	Susceptible	Susceptible	No Interpretation	Intermediate	No Interpretation	Susceptible	Resistant	Susceptible	Resistant	Susceptible	Susceptible	Susceptible	Susceptible	Resistant	Susceptible	Susceptible	Susceptible													2015-04-21 10:59:04	Equine	Quarter Horse, American	NULL	NULL	Neutered	Sensitivity	Nasal	Bacterium	Strep. equi ss zooepidemicus		QH	1	0	0	0	0
Intermediate	Susceptible	Susceptible	Susceptible	Susceptible	Susceptible	Susceptible	No Interpretation	Intermediate	Resistant	Susceptible	Susceptible	Susceptible	Susceptible	Susceptible	Susceptible	Resistant	Susceptible	Susceptible	Susceptible													2013-04-05 14:09:00	Equine	Thoroughbred	4	Years	Female	Sensitivity	Lung	Bacterium	Strep. equi ss zooepidemicus	208	TB	1	0	0	0	0	0
Resistant	Susceptible	Susceptible	Susceptible	Susceptible	Susceptible	Intermediate	No Interpretation	Intermediate	Resistant	Susceptible	Resistant	Susceptible	Susceptible	Susceptible	Susceptible	Resistant	Susceptible	Susceptible	Susceptible													2012-04-08 14:55:42	Equine	Thoroughbred	2	Months	Male	Sensitivity	Lung	Bacterium	Strep. equi ss zooepidemicus	8	TB	1	0	0	0	0	0
Resistant	Susceptible	Susceptible	Susceptible	Susceptible	Susceptible	Intermediate	No Interpretation	Susceptible	Resistant	Susceptible	Resistant	Susceptible	Susceptible	Susceptible	Susceptible	Resistant	Susceptible	Susceptible	Resistant													2015-04-27 14:32:17	Equine	Thoroughbred	22	Years	Female	Sensitivity	Lung	Bacterium	Strep. equi ss zooepidemicus	1144	TB	1	0	0	0	0	0
Susceptible	Susceptible	Susceptible	Susceptible	Susceptible	Susceptible	Susceptible	No Interpretation	Susceptible	Intermediate	Susceptible	Susceptible	Susceptible	Susceptible	Susceptible	Susceptible	Susceptible	Susceptible	Susceptible	Susceptible													2014-04-23 09:31:11	Equine	Thoroughbred	30	Days	NULL	Sensitivity	Cavity, thoracic	Bacterium	Strep. equi ss zooepidemicus	4.28571	TB	0	0	0	0	0	0
Susceptible	Susceptible	Susceptible	Susceptible	Susceptible	Susceptible	Susceptible	No Interpretation	Susceptible	Intermediate	Susceptible	Susceptible	Susceptible	Susceptible	Intermediate	Susceptible	Susceptible	Susceptible	Susceptible	Susceptible													2013-04-10 10:16:00	Equine	Thoroughbred	2	Years	Female	Sensitivity	Thoracic	Bacterium	Strep. equi ss zooepidemicus	104	TB	0	0	0	0	0	0
Intermediate	Susceptible	Susceptible	Susceptible	Susceptible	Susceptible	Susceptible	No Interpretation	Susceptible	Resistant	Susceptible	Susceptible	Susceptible	Susceptible	Susceptible	Susceptible	Resistant	Susceptible	Susceptible	Susceptible													2014-04-27 03:09:43	Equine	Thoroughbred	NULL	NULL	Male	Sensitivity	Lung	Bacterium	Strep. equi ss zooepidemicus		TB	1	0	0	0	0	0
Resistant	Susceptible	Susceptible	Susceptible	Susceptible	Susceptible	Intermediate	No Interpretation	Susceptible	Resistant	Susceptible	Intermediate	Susceptible	Susceptible	Susceptible	Susceptible	Intermediate	Susceptible	Susceptible	Susceptible													2012-04-13 11:04:52	Equine	Thoroughbred	2	Years	Female	Sensitivity	Lung	Bacterium	Strep. equi ss zooepidemicus	104	TB	1	0	0	0	0	0
Intermediate	Susceptible	Susceptible	Intermediate	Intermediate	Susceptible	Susceptible	No Interpretation	Susceptible	Resistant	Susceptible	Susceptible	Susceptible	Susceptible	Susceptible	Susceptible	Susceptible	Susceptible	Susceptible	Susceptible													2013-04-16 07:21:39	Equine	Rocky Mountain Horse	6	Years	Neutered	Sensitivity	Throat	Bacterium	Strep. equi ss zooepidemicus	312	RMH	1	0	0	1	1	0
Susceptible	Susceptible	Susceptible	Susceptible	Susceptible	Susceptible	Susceptible	No Interpretation	Susceptible	Resistant	Susceptible	Susceptible	Susceptible	Susceptible	Susceptible	Susceptible	Resistant	Susceptible	Susceptible	Susceptible													2017-04-22 16:38:18	Equine	Quarter Horse, American	NULL	NULL	Male	Sensitivity	Throat	Bacterium	Strep. equi ss zooepidemicus		QH	0	0	0	0	0	0
Resistant	Susceptible	Susceptible	Susceptible	Susceptible	Susceptible	Intermediate	No Interpretation	Susceptible	Resistant	Susceptible	Resistant	Susceptible	Susceptible	Susceptible	Susceptible	Resistant	Susceptible	Susceptible	Resistant													2017-04-23 13:21:21	Equine	Thoroughbred	3	Weeks	Female	Sensitivity	Lung	Bacterium	Strep. equi ss zooepidemicus	3	TB	1	0	0	0	0	0
Intermediate	Susceptible	Susceptible	Susceptible	Susceptible	No Interpretation	Intermediate	No Interpretation	Resistant	Resistant	Susceptible	Resistant	Susceptible	Susceptible	Susceptible	Susceptible	Resistant	Susceptible	Susceptible	Susceptible													2015-05-05 16:49:58	Equine	Thoroughbred	1	Years	Female	Sensitivity	Lung	Bacterium	Strep. equi ss zooepidemicus	52	TB	1	0	0	0	0
Resistant	Susceptible	Susceptible	Susceptible	Susceptible	No Interpretation	Intermediate	No Interpretation	Resistant	Resistant	Susceptible	Resistant	Susceptible	Susceptible	Susceptible	Susceptible	Resistant	Susceptible	Susceptible	Resistant													2017-04-25 09:59:11	Equine	Thoroughbred	4	Days	Female	Sensitivity	Lung	Bacterium	Strep. equi ss zooepidemicus	0.571429	TB	1	0	0	0	0
Resistant	Susceptible	Susceptible	Susceptible	Susceptible	Susceptible	Intermediate	No Interpretation	Susceptible	Resistant	Susceptible	Susceptible	Susceptible	Susceptible	Susceptible	Susceptible	Resistant	Susceptible	Susceptible	Susceptible													2016-01-13 10:08:04	Equine	Saddlebred, American	NULL	NULL	NULL	Sensitivity	Lung	Bacterium	Strep. equi ss zooepidemicus		Saddl	1	0	0	0	0	0
Intermediate	Susceptible	Susceptible	Susceptible	Susceptible	Susceptible	Susceptible	No Interpretation	Susceptible	Resistant	Susceptible	Susceptible	Susceptible	Susceptible	Susceptible	Susceptible	Intermediate	Susceptible	Susceptible	Susceptible													2014-05-03 13:47:00	Equine	Tennessee Walking Horse	2	Days	Female	Sensitivity	Lung	Bacterium	Strep. equi ss zooepidemicus	0.285714	TWH	1	0	0	0	0	0
Resistant	Susceptible	Susceptible	Susceptible	Susceptible	Susceptible	Susceptible	No Interpretation	Susceptible	Intermediate	Susceptible	Resistant	Susceptible	Susceptible	Susceptible	Susceptible	Resistant	Susceptible	Susceptible	Susceptible													2014-05-05 09:44:55	Equine	Thoroughbred	NULL	NULL	Female	Sensitivity	Lung	Bacterium	Strep. equi ss zooepidemicus		TB	1	0	0	0	0	0
Intermediate	Susceptible	Susceptible	Susceptible	Susceptible	Susceptible	Intermediate	No Interpretation	Susceptible	Resistant	Susceptible	Susceptible	Susceptible	Susceptible	Susceptible	Susceptible	Intermediate	Susceptible	Susceptible	Resistant													2012-04-17 15:24:21	Equine	NULL	2	Months	NULL	Sensitivity	Lung	Bacterium	Strep. equi ss zooepidemicus	8		1	0	0	0	0	0
Resistant	Intermediate	Susceptible	Susceptible	Susceptible	No Interpretation	Intermediate	No Interpretation	Resistant	Susceptible	Susceptible	Resistant	Susceptible	Resistant	Resistant	Susceptible	Resistant	Susceptible	Susceptible	Susceptible													2017-04-28 07:36:46	Equine	Saddlebred, American	NULL	NULL	NULL	Sensitivity	Nasal	Bacterium	Strep. equi ss zooepidemicus		Saddl	1	1	0	0	0
Intermediate	Intermediate	Susceptible	Susceptible	Susceptible	Susceptible	Intermediate	No Interpretation	Resistant	Resistant	Susceptible	Resistant	Susceptible	Susceptible	Susceptible	Susceptible	Resistant	Susceptible	Susceptible	Susceptible													2012-04-21 09:19:00	Equine	Saddlebred, American	24	Years	Neutered	Sensitivity	Nasal	Bacterium	Strep. equi ss zooepidemicus	1248	Saddl	1	1	0	0	0	0
Intermediate	Susceptible	Susceptible	Susceptible	Susceptible	Susceptible	Intermediate	No Interpretation	Susceptible	Resistant	Intermediate	Susceptible	Susceptible	Susceptible	Susceptible	Susceptible	Susceptible	Susceptible	Susceptible	Susceptible													2014-05-13 12:17:59	Equine	Thoroughbred	8	Years	Female	Sensitivity	Lung	Bacterium	Strep. equi ss zooepidemicus	416	TB	1	0	0	0	0	0
Intermediate	Susceptible	Susceptible	Susceptible	Susceptible	Susceptible	Susceptible	No Interpretation	Susceptible	Resistant	Susceptible	Intermediate	Susceptible	Susceptible	Susceptible	Susceptible	Resistant	Susceptible	Susceptible	Resistant													2015-05-18 11:24:35	Equine	Thoroughbred	4	Days	Female	Sensitivity	Lung	Bacterium	Strep. equi ss zooepidemicus	0.571429	TB	1	0	0	0	0	0
Resistant	Susceptible	Susceptible	Susceptible	Susceptible	Susceptible	Intermediate	No Interpretation	Resistant	Resistant	Susceptible	Resistant	Susceptible	Susceptible	Susceptible	Susceptible	Resistant	Susceptible	Susceptible	Susceptible													2015-05-18 12:12:43	Equine	Thoroughbred	45	Days	NULL	Sensitivity	Lung	Bacterium	Strep. equi ss zooepidemicus	6.42857	TB	1	0	0	0	0	0
Intermediate	Susceptible	Susceptible	Susceptible	Susceptible	Susceptible	Susceptible	No Interpretation	Susceptible	Resistant	Susceptible	Susceptible	Susceptible	Susceptible	Susceptible	Susceptible	Intermediate	Susceptible	Susceptible	Susceptible													2012-04-24 16:11:59	Equine	NULL	9	Years	Neutered	Sensitivity	Lung	Bacterium	Strep. equi ss zooepidemicus	468		1	0	0	0	0	0
Intermediate	Susceptible	Susceptible	Susceptible	Susceptible	Susceptible	Susceptible	No Interpretation	Resistant	Resistant	Susceptible	Intermediate	Susceptible	Susceptible	Susceptible	Susceptible	Resistant	Susceptible	Susceptible	Susceptible													2012-04-26 12:23:00	Equine	Thoroughbred	NULL	NULL	Male	Sensitivity	Lung	Bacterium	Strep. equi ss zooepidemicus		TB	1	0	0	0	0	0
Resistant	Susceptible	Susceptible	Susceptible	Susceptible	Susceptible	Susceptible	No Interpretation	Susceptible	Resistant	Susceptible	Intermediate	Susceptible	Susceptible	Susceptible	Susceptible	Intermediate	Susceptible	Susceptible	Resistant													2015-05-21 16:43:12	Equine	Thoroughbred	2	Months	NULL	Sensitivity	Lung	Bacterium	Strep. equi ss zooepidemicus	8	TB	1	0	0	0	0	0
Susceptible	Susceptible	Susceptible	Susceptible	Susceptible	Susceptible	Susceptible	No Interpretation	Susceptible	Intermediate	Resistant	Susceptible	Susceptible	Susceptible	Intermediate	Susceptible	Intermediate	Susceptible	Susceptible	Susceptible													2013-05-02 10:19:11	Equine	Thoroughbred	2	Days	Male	Sensitivity	Lung	Bacterium	Strep. equi ss zooepidemicus	0.285714	TB	0	0	0	0	0	0
Resistant	Resistant	Resistant	Resistant	Susceptible	No Interpretation	Intermediate	No Interpretation	Susceptible	Susceptible	Susceptible	Susceptible	Susceptible	Susceptible	Susceptible	Resistant	Resistant	Susceptible	Resistant	Susceptible													2016-05-08 15:49:05	Equine	Thoroughbred	1	Days	Female	Sensitivity	Lung	Bacterium	Strep. equi ss zooepidemicus	0.142857	TB	1	1	1	1	0
Resistant	Susceptible	Susceptible	Susceptible	Susceptible	Susceptible	Intermediate	No Interpretation	Susceptible	Intermediate	Susceptible	Resistant	Susceptible	Susceptible	Susceptible	Susceptible	Intermediate	Susceptible	Susceptible	Susceptible													2016-05-08 15:53:36	Equine	Thoroughbred	1	Days	Male	Sensitivity	Lung	Bacterium	Strep. equi ss zooepidemicus	0.142857	TB	1	0	0	0	0	0
Resistant	Susceptible	Susceptible	Susceptible	Susceptible	Susceptible	Intermediate	No Interpretation	Susceptible	Resistant	Susceptible	Susceptible	Susceptible	Susceptible	Susceptible	Susceptible	Susceptible	Susceptible	Susceptible	Susceptible													2013-05-05 16:41:36	Equine	Thoroughbred	NULL	NULL	Male	Sensitivity	Lung	Bacterium	Strep. equi ss zooepidemicus		TB	1	0	0	0	0	0
Intermediate	Susceptible	Susceptible	Susceptible	Susceptible	Susceptible	Susceptible	No Interpretation	Intermediate	Resistant	Susceptible	Susceptible	Susceptible	Susceptible	Susceptible	Susceptible	Resistant	Susceptible	Susceptible	Susceptible													2013-05-07 12:30:00	Equine	Thoroughbred	2	Months	Male	Sensitivity	Lung	Bacterium	Strep. equi ss zooepidemicus	8	TB	1	0	0	0	0	0
Intermediate	Susceptible	Susceptible	Susceptible	Susceptible	Susceptible	Susceptible	No Interpretation	Intermediate	Resistant	Susceptible	Susceptible	Susceptible	Susceptible	Susceptible	Susceptible	Resistant	Susceptible	Susceptible	Susceptible													2014-05-23 14:45:39	Equine	Thoroughbred	3	Years	Male	Sensitivity	Transtrachea	Bacterium	Strep. equi ss zooepidemicus	156	TB	1	0	0	0	0	0
Resistant	Susceptible	Susceptible	Susceptible	Susceptible	No Interpretation	Susceptible	No Interpretation	Susceptible	Intermediate	Susceptible	Resistant	Susceptible	Susceptible	Susceptible	Susceptible	Susceptible	Susceptible	Susceptible	Susceptible													2016-05-15 16:22:25	Equine	Thoroughbred	NULL	NULL	NULL	Sensitivity	Lung	Bacterium	Strep. equi ss zooepidemicus		TB	1	0	0	0	0
Susceptible	Resistant	Resistant	Susceptible	Intermediate	No Interpretation	Susceptible	No Interpretation	Susceptible	Susceptible	Resistant	Susceptible	Susceptible	Susceptible	Susceptible	Susceptible	Intermediate	Intermediate	Susceptible	Resistant													2012-05-03 16:50:11	Equine	Thoroughbred	NULL	NULL	NULL	Sensitivity	Lung	Bacterium	Strep. equi ss zooepidemicus		TB	0	1	1	0	1
Resistant	Susceptible	Susceptible	Susceptible	Susceptible	Susceptible	Intermediate	No Interpretation	Susceptible	Resistant	Susceptible	Intermediate	Susceptible	Susceptible	Susceptible	Susceptible	Intermediate	Susceptible	Susceptible	Susceptible													2014-05-31 11:20:58	Equine	Thoroughbred	1	Weeks	NULL	Sensitivity	Lung	Bacterium	Strep. equi ss zooepidemicus	1	TB	1	0	0	0	0	0
Intermediate	Susceptible	Susceptible	Susceptible	Susceptible	Susceptible	Susceptible	No Interpretation	Susceptible	Resistant	Susceptible	Intermediate	Susceptible	Resistant	Susceptible	Susceptible	Intermediate	Susceptible	Susceptible	Susceptible													2013-05-14 09:48:55	Equine	Quarter Horse, American	6	Years	Neutered	Sensitivity	Nasal	Bacterium	Strep. equi ss zooepidemicus	312	QH	1	0	0	0	0	0
Intermediate	Susceptible	Susceptible	Susceptible	Susceptible	Susceptible	Susceptible	No Interpretation	Resistant	Resistant	Susceptible	Intermediate	Susceptible	Susceptible	Susceptible	Susceptible	Resistant	Susceptible	Susceptible	Resistant													2015-06-04 14:35:54	Equine	Thoroughbred	9	Days	Male	Sensitivity	Lung	Bacterium	Strep. equi ss zooepidemicus	1.28571	TB	1	0	0	0	0	0
Resistant	Susceptible	Susceptible	Susceptible	Susceptible	Susceptible	Intermediate	No Interpretation	Susceptible	Resistant	Susceptible	Intermediate	Susceptible	Susceptible	Susceptible	Susceptible	Intermediate	Susceptible	Susceptible	Susceptible													2014-06-04 08:05:18	Equine	Thoroughbred	3	Weeks	Male	Sensitivity	Lung	Bacterium	Strep. equi ss zooepidemicus	3	TB	1	0	0	0	0	0
Resistant	Susceptible	Susceptible	Susceptible	Susceptible	Susceptible	Susceptible	No Interpretation	Susceptible	Susceptible	Susceptible	Susceptible	Susceptible	Susceptible	Susceptible	Susceptible	Susceptible	Intermediate	Susceptible	Susceptible													2016-05-20 11:48:25	Equine	Thoroughbred	NULL	NULL	Female	Sensitivity	Lung	Bacterium	Strep. equi ss zooepidemicus		TB	1	0	0	0	0	0
Intermediate	Susceptible	Susceptible	Susceptible	Susceptible	Susceptible	Susceptible	No Interpretation	Intermediate	Resistant	Susceptible	Intermediate	Susceptible	Susceptible	Susceptible	Susceptible	Resistant	Susceptible	Susceptible	Resistant													2015-06-09 10:13:10	Equine	Pony	5	Years	NULL	Sensitivity	Nasal	Bacterium	Strep. equi ss zooepidemicus	260	Pony	1	0	0	0	0	0
Resistant	Susceptible	Susceptible	Susceptible	Susceptible	Susceptible	Susceptible	No Interpretation	Resistant	Intermediate	Susceptible	Resistant	Susceptible	Susceptible	Susceptible	Susceptible	Resistant	Susceptible	Susceptible	Susceptible													2016-05-21 13:14:27	Equine	Thoroughbred	2	Weeks	Female	Sensitivity	Lung	Bacterium	Strep. equi ss zooepidemicus	2	TB	1	0	0	0	0	0
Resistant	Susceptible	Susceptible	Susceptible	Susceptible	Susceptible	Susceptible	No Interpretation	Resistant	Resistant	Susceptible	Resistant	Susceptible	Susceptible	Susceptible	Susceptible	Resistant	Susceptible	Susceptible	Susceptible													2016-05-22 13:39:19	Equine	Thoroughbred	3	Years	Female	Sensitivity	Lung	Bacterium	Strep. equi ss zooepidemicus	156	TB	1	0	0	0	0	0
Intermediate	Susceptible	Susceptible	Susceptible	Susceptible	Susceptible	Susceptible	No Interpretation	Resistant	Resistant	Susceptible	Intermediate	Susceptible	Susceptible	Susceptible	Susceptible	Resistant	Susceptible	Susceptible	Susceptible													2012-05-10 16:38:20	Equine	Thoroughbred	8	Years	Female	Sensitivity	Lung	Bacterium	Strep. equi ss zooepidemicus	416	TB	1	0	0	0	0	0
Resistant	Susceptible	Resistant	Susceptible	Susceptible	Susceptible	Resistant	Resistant	Resistant	Resistant	Resistant	Resistant	Resistant	Susceptible	Susceptible	Resistant	Resistant	Susceptible	Susceptible	Resistant													2016-05-27 12:36:56	Equine	Thoroughbred	3	Weeks	Female	Sensitivity	Lung	Bacterium	Strep. equi ss zooepidemicus	3	TB	1	0	1	0	0	0
Intermediate	Susceptible	Susceptible	Susceptible	Susceptible	Susceptible	Susceptible	No Interpretation	Susceptible	Intermediate	Susceptible	Susceptible	Susceptible	Susceptible	Susceptible	Susceptible	Intermediate	Susceptible	Susceptible	Susceptible													2013-05-27 10:38:31	Equine	Arabian	NULL	NULL	NULL	Sensitivity	Lung	Bacterium	Strep. equi ss zooepidemicus		Arabi	1	0	0	0	0	0
Intermediate	Susceptible	Susceptible	Susceptible	Susceptible	Susceptible	Susceptible	No Interpretation	Susceptible	Resistant	Susceptible	Susceptible	Susceptible	Susceptible	Susceptible	Susceptible	Intermediate	Susceptible	Susceptible	Susceptible													2013-05-28 11:55:24	Equine	Thoroughbred	3	Days	NULL	Sensitivity	Lung	Bacterium	Strep. equi ss zooepidemicus	0.428571	TB	1	0	0	0	0	0
Intermediate	Susceptible	Susceptible	Susceptible	Susceptible	Susceptible	Susceptible	No Interpretation	Susceptible	Resistant	Susceptible	Intermediate	Susceptible	Susceptible	Susceptible	Susceptible	Susceptible	Susceptible	Susceptible	Susceptible													2015-06-22 10:20:12	Equine	Thoroughbred	4	Months	NULL	Sensitivity	Lung	Bacterium	Strep. equi ss zooepidemicus	16	TB	1	0	0	0	0	0
Intermediate	Susceptible	Susceptible	Susceptible	Susceptible	Susceptible	Intermediate	No Interpretation	Susceptible	Resistant	Susceptible	Intermediate	Susceptible	Susceptible	Susceptible	Susceptible	Resistant	Susceptible	Susceptible	Susceptible													2012-05-19 12:30:21	Equine	NULL	NULL	NULL	NULL	Sensitivity	Lung	Bacterium	Strep. equi ss zooepidemicus			1	0	0	0	0	0
Resistant	Susceptible	Susceptible	Susceptible	Susceptible	Susceptible	Intermediate	No Interpretation	Susceptible	Intermediate	Susceptible	Resistant	Susceptible	Susceptible	Susceptible	Susceptible	Susceptible	Susceptible	Susceptible	Resistant													2017-06-02 08:55:13	Equine	Thoroughbred	NULL	NULL	NULL	Sensitivity	Lung	Bacterium	Strep. equi ss zooepidemicus		TB	1	0	0	0	0	0
Susceptible	Susceptible	Susceptible	Susceptible	Susceptible	Susceptible	Susceptible	No Interpretation	Susceptible	Intermediate	Susceptible	Susceptible	Susceptible	Susceptible	Susceptible	Susceptible	Intermediate	Susceptible	Susceptible	Susceptible													2013-05-31 09:02:20	Equine	Thoroughbred	90	Days	Female	Sensitivity	Lung	Bacterium	Strep. equi ss zooepidemicus	12.8571	TB	0	0	0	0	0	0
Resistant	Susceptible	Susceptible	Susceptible	Susceptible	Susceptible	Susceptible	No Interpretation	Susceptible	Resistant	Susceptible	Intermediate	Susceptible	Susceptible	Susceptible	Susceptible	Resistant	Susceptible	Susceptible	Susceptible													2013-05-31 12:11:47	Equine	Thoroughbred	3	Months	Male	Sensitivity	Bronchus	Bacterium	Strep. equi ss zooepidemicus	12	TB	1	0	0	0	0	0
Resistant	Susceptible	Susceptible	Susceptible	Susceptible	Susceptible	Intermediate	No Interpretation	Susceptible	Resistant	Susceptible	Resistant	Susceptible	Susceptible	Susceptible	Susceptible	Resistant	Susceptible	Susceptible	Resistant													2017-06-04 13:10:01	Equine	Warm Blood	NULL	NULL	Male	Sensitivity	Lung	Bacterium	Strep. equi ss zooepidemicus		WB	1	0	0	0	0	0
Resistant	Susceptible	Susceptible	Susceptible	Susceptible	Susceptible	Intermediate	No Interpretation	Susceptible	Resistant	Susceptible	Resistant	Susceptible	Susceptible	Susceptible	Susceptible	Resistant	Susceptible	Susceptible	Susceptible													2015-06-26 10:19:43	Equine	Thoroughbred	NULL	NULL	NULL	Sensitivity	Lung	Bacterium	Strep. equi ss zooepidemicus		TB	1	0	0	0	0	0
Resistant	Susceptible	Susceptible	Susceptible	Susceptible	No Interpretation	Intermediate	No Interpretation	Susceptible	Resistant	Susceptible	Resistant	Susceptible	Susceptible	Susceptible	Resistant	Intermediate	Susceptible	Susceptible	Resistant													2017-06-07 14:52:17	Equine	Thoroughbred	3	Months	Male	Sensitivity	Lung	Bacterium	Strep. equi ss zooepidemicus	12	TB	1	0	0	0	0
Susceptible	Susceptible	Susceptible	Susceptible	Susceptible	Susceptible	Susceptible	No Interpretation	Susceptible	Resistant	Susceptible	Susceptible	Susceptible	Susceptible	Susceptible	Susceptible	Intermediate	Susceptible	Susceptible	Susceptible													2013-06-06 07:43:20	Equine	Thoroughbred	1	Years	Female	Sensitivity	Nasal	Bacterium	Strep. equi ss zooepidemicus	52	TB	0	0	0	0	0	0
Resistant	Susceptible	Resistant	Susceptible	Susceptible	Susceptible	Intermediate	Resistant	Resistant	Intermediate	Resistant	Resistant	Susceptible	Susceptible	Intermediate	Susceptible	Resistant	Susceptible	Susceptible	Susceptible													2014-06-29 02:59:02	Equine	Thoroughbred	NULL	NULL	Female	Sensitivity	Lung	Bacterium	Strep. equi ss zooepidemicus		TB	1	0	1	0	0	0
Resistant	Susceptible	Susceptible	Susceptible	Susceptible	Susceptible	Intermediate	No Interpretation	Intermediate	Resistant	Susceptible	Intermediate	Susceptible	Susceptible	Susceptible	Susceptible	Resistant	Susceptible	Susceptible	Susceptible													2012-05-26 08:51:50	Equine	Thoroughbred	4	Years	Neutered	Sensitivity	Lung	Bacterium	Strep. equi ss zooepidemicus	208	TB	1	0	0	0	0	0
Resistant	Intermediate	Susceptible	Susceptible	Susceptible	No Interpretation	Intermediate	No Interpretation	Susceptible	Resistant	Susceptible	Resistant	Susceptible	Resistant	Intermediate	Susceptible	Resistant	Susceptible	Susceptible	Resistant													2017-06-09 07:46:17	Equine	Thoroughbred	NULL	NULL	Neutered	Sensitivity	Nasal	Bacterium	Strep. equi ss zooepidemicus		TB	1	1	0	0	0
Resistant	Susceptible	Susceptible	Susceptible	Susceptible	Susceptible	Intermediate	No Interpretation	Susceptible	Resistant	Susceptible	Resistant	Susceptible	Susceptible	Susceptible	Susceptible	Resistant	Susceptible	Susceptible	Resistant													2017-06-09 07:49:02	Equine	Quarter Horse, American	3	Years	Neutered	Sensitivity	Nasal	Bacterium	Strep. equi ss zooepidemicus	156	QH	1	0	0	0	0	0
Resistant	Susceptible	Susceptible	Susceptible	Susceptible	Susceptible	Intermediate	No Interpretation	Resistant	Resistant	Susceptible	Resistant	Susceptible	Susceptible	Susceptible	Susceptible	Resistant	Susceptible	Susceptible	Resistant													2017-06-11 12:56:30	Equine	Thoroughbred	5	Years	Neutered	Sensitivity	Lung	Bacterium	Strep. equi ss zooepidemicus	260	TB	1	0	0	0	0	0
Resistant	Resistant	Resistant	Resistant	Susceptible	No Interpretation	Resistant	Resistant	Resistant	Resistant	Resistant	Resistant	Susceptible	Resistant	Resistant	Susceptible	Resistant	Intermediate	Susceptible	Resistant													2016-06-11 14:08:48	Equine	Thoroughbred	19	Years	Female	Sensitivity	Lung	Bacterium	Strep. equi ss zooepidemicus	988	TB	1	1	1	1	0
Resistant	Susceptible	Susceptible	Susceptible	Susceptible	No Interpretation	Intermediate	No Interpretation	Intermediate	Intermediate	Susceptible	Intermediate	Susceptible	Susceptible	Susceptible	Susceptible	Resistant	Susceptible	Susceptible	Susceptible													2014-07-07 10:11:12	Equine	Thoroughbred	12	Years	Male	Sensitivity	Lung	Bacterium	Strep. equi ss zooepidemicus	624	TB	1	0	0	0	0
Resistant	Susceptible	Susceptible	Susceptible	Susceptible	No Interpretation	Intermediate	No Interpretation	Resistant	Resistant	Intermediate	Resistant	Susceptible	Susceptible	Susceptible	Susceptible	Resistant	Susceptible	Susceptible	Resistant													2017-06-14 15:03:46	Equine	Thoroughbred	3	Years	Male	Sensitivity	Lung	Bacterium	Strep. equi ss zooepidemicus	156	TB	1	0	0	0	0
Resistant	Susceptible	Susceptible	Susceptible	Susceptible	Susceptible	Intermediate	No Interpretation	Susceptible	Resistant	Susceptible	Resistant	Susceptible	Susceptible	Susceptible	Susceptible	Resistant	Susceptible	Susceptible	Resistant													2017-06-15 09:03:03	Equine	NULL	NULL	NULL	NULL	Sensitivity	Nasal	Bacterium	Strep. equi ss zooepidemicus			1	0	0	0	0	0
Resistant	Susceptible	Susceptible	Susceptible	Susceptible	Susceptible	Susceptible	No Interpretation	Susceptible	Resistant	Susceptible	Susceptible	Susceptible	Susceptible	Susceptible	Susceptible	Susceptible	Susceptible	Susceptible	Resistant													2012-06-04 10:02:44	Equine	Thoroughbred	11	Days	Female	Sensitivity	Lung	Bacterium	Strep. equi ss zooepidemicus	1.57143	TB	1	0	0	0	0	0
Resistant	Susceptible	Susceptible	Susceptible	Susceptible	Susceptible	Intermediate	No Interpretation	Susceptible	Resistant	Susceptible	Intermediate	Susceptible	Susceptible	Susceptible	Susceptible	Intermediate	Susceptible	Susceptible	Susceptible													2012-06-05 14:11:40	Equine	Tennessee Walking Horse	3	Months	Female	Sensitivity	Lung	Bacterium	Strep. equi ss zooepidemicus	12	TWH	1	0	0	0	0	0
Resistant	Susceptible	Susceptible	Susceptible	Intermediate	Susceptible	Intermediate	No Interpretation	Susceptible	Resistant	Susceptible	Resistant	Susceptible	Susceptible	Susceptible	Susceptible	Resistant	Susceptible	Susceptible	Resistant													2017-06-18 14:01:06	Equine	Thoroughbred	2	Months	Female	Sensitivity	Lung	Bacterium	Strep. equi ss zooepidemicus	8	TB	1	0	0	0	1	0
Susceptible	Susceptible	Susceptible	Susceptible	Susceptible	Susceptible	Susceptible	No Interpretation	Susceptible	Resistant	Susceptible	Intermediate	Susceptible	Susceptible	Susceptible	Susceptible	Intermediate	Susceptible	Susceptible	Susceptible													2013-06-24 07:54:41	Equine	Thoroughbred	2	Months	Male	Sensitivity	Lung	Bacterium	Strep. equi ss zooepidemicus	8	TB	0	0	0	0	0	0
Resistant	Susceptible	Susceptible	Susceptible	Susceptible	Susceptible	Intermediate	No Interpretation	Susceptible	Resistant	Susceptible	Resistant	Susceptible	Susceptible	Susceptible	Susceptible	Resistant	Susceptible	Susceptible	Susceptible													2016-01-18 15:12:16	Equine	Thoroughbred	23	Years	Male	Sensitivity	Lung	Bacterium	Strep. equi ss zooepidemicus	1196	TB	1	0	0	0	0	0
Resistant	Susceptible	Susceptible	Susceptible	Susceptible	Susceptible	Susceptible	No Interpretation	Resistant	Intermediate	Susceptible	Resistant	Susceptible	Susceptible	Susceptible	Susceptible	Resistant	Susceptible	Susceptible	Susceptible													2014-07-23 14:34:08	Equine	Thoroughbred	1	Years	Female	Sensitivity	Lung	Bacterium	Strep. equi ss zooepidemicus	52	TB	1	0	0	0	0	0
Intermediate	Susceptible	Susceptible	Susceptible	Susceptible	Susceptible	Susceptible	No Interpretation	Susceptible	Intermediate	Susceptible	Susceptible	Susceptible	Susceptible	Susceptible	Susceptible	Susceptible	Susceptible	Susceptible	Susceptible													2013-06-28 11:14:43	Equine	Saddlebred, American	3	Months	Male	Sensitivity	Lung	Bacterium	Strep. equi ss zooepidemicus	12	Saddl	1	0	0	0	0	0
Resistant	Intermediate	Susceptible	Intermediate	Resistant	No Interpretation	Intermediate	No Interpretation	Resistant	Resistant	Susceptible	Resistant	Susceptible	Resistant	Intermediate	Susceptible	Resistant	Susceptible	Susceptible	Susceptible													2012-06-20 13:28:37	Equine	Thoroughbred	1	Years	Male	Sensitivity	Lung	Bacterium	Strep. equi ss zooepidemicus	52	TB	1	1	0	1	1
Susceptible	Susceptible	Susceptible	Susceptible	Susceptible	Susceptible	Susceptible	No Interpretation	Susceptible	Intermediate	Susceptible	Susceptible	Susceptible	Susceptible	Susceptible	Susceptible	Intermediate	Susceptible	Susceptible	Susceptible													2012-06-21 11:27:43	Equine	NULL	20	Years	Female	Sensitivity	Thoracic	Bacterium	Strep. equi ss zooepidemicus	1040		0	0	0	0	0	0
Susceptible	Susceptible	Susceptible	Susceptible	Susceptible	Susceptible	Susceptible	No Interpretation	Susceptible	Intermediate	Susceptible	Susceptible	Susceptible	Susceptible	Susceptible	Susceptible	Intermediate	Susceptible	Susceptible	Susceptible													2013-07-03 13:16:30	Equine	Mixed Breed	2.5	Months	Female	Sensitivity	Lung	Bacterium	Strep. equi ss zooepidemicus	10	Mixed	0	0	0	0	0	0
Intermediate	Susceptible	Susceptible	Susceptible	Susceptible	Susceptible	Intermediate	No Interpretation	Resistant	Resistant	Susceptible	Intermediate	Susceptible	Susceptible	Susceptible	Susceptible	Resistant	Susceptible	Susceptible	Susceptible													2014-07-29 13:57:29	Equine	Thoroughbred	NULL	NULL	NULL	Sensitivity	Lung	Bacterium	Strep. equi ss zooepidemicus		TB	1	0	0	0	0	0
Resistant	Susceptible	Susceptible	Susceptible	Susceptible	No Interpretation	Intermediate	No Interpretation	Susceptible	Intermediate	Susceptible	Resistant	Susceptible	Susceptible	Susceptible	Susceptible	Resistant	Susceptible	Susceptible	Resistant													2016-07-06 08:31:27	Equine	Saddlebred, American	1	Months	Female	Sensitivity	Lung	Bacterium	Strep. equi ss zooepidemicus	4	Saddl	1	0	0	0	0
Resistant	Susceptible	Susceptible	Susceptible	Susceptible	Susceptible	Susceptible	No Interpretation	Susceptible	Intermediate	Susceptible	Resistant	Susceptible	Susceptible	Susceptible	Susceptible	Resistant	Susceptible	Susceptible	Susceptible													2016-07-07 17:02:37	Equine	NULL	2	Days	Male	Sensitivity	Lung	Bacterium	Strep. equi ss zooepidemicus	0.285714		1	0	0	0	0	0
Intermediate	Susceptible	Susceptible	Susceptible	Susceptible	Susceptible	Susceptible	No Interpretation	Susceptible	Resistant	Susceptible	Susceptible	Susceptible	Susceptible	Susceptible	Susceptible	Susceptible	Susceptible	Susceptible	Susceptible													2012-06-27 16:02:00	Equine	Thoroughbred	2	Years	Female	Sensitivity	Lung	Bacterium	Strep. equi ss zooepidemicus	104	TB	1	0	0	0	0	0
[truncated: 36 more columns]
